# Supplementary material for: Binary conformers of a flexible, long-chain fluoroalcohol: dispersion controlled selectivity and relative abundances in a jet
Source: Royal Society of Chemistry journal article supplement (doi:10.1039/d4cp00401a), 2024-01-01
Supplement: d4cp00401a1.pdf [file d4cp00401a1.pdf]

## Support Information

### Binary Conformers of a Flexible, Long-chain Fluoroalcohol: Dispersion

#### Controlled Selectivity and Relative Abundances in a Jet

Tao Lu,<sup>a,b</sup> Fan Xie,<sup>a,c</sup> Nathan A. Seifert,<sup>a,d</sup> Reihaneh Hamidi Mejlje,<sup>a</sup> Wolfgang Jäger,<sup>a</sup> and Yunjie Xu<sup>†a</sup>

<sup>a</sup>Department of Chemistry, University of Alberta, 11227 Saskatchewan Drive, Edmonton, AB, Canada.

<sup>b</sup>Key Laboratory of Biology and Medical Engineering, School of Biology and Engineering, Guizhou Medical University, Guiyang 550025, China.

<sup>c</sup>Present address: Deutsches Elektronen-Synchrotron (DESY), Notkestraße 85, 22607 Hamburg, Germany.

<sup>d</sup>Chemistry and Chemical & Biomedical Engineering Department, University of New Haven, 300 Boston Post Rd, West Haven, CT, 06516, USA.

\* Corresponding Author E-mail: yunjie.xu@ualberta.ca

#### Contents:

|                                                                                                                                                                                                   |        |
|---------------------------------------------------------------------------------------------------------------------------------------------------------------------------------------------------|--------|
| <b>Table S1.</b> Spectroscopic properties of the 102 binary TFB conformers at B3LYP-D3BJ/def2-TZVP.....                                                                                           | S2-S3  |
| <b>Table S2.</b> Spectroscopic properties of the 16 binary TFB conformers at B3LYP-D3BJ/6-311++G(2d,p).....                                                                                       | S4     |
| <b>Table S3.</b> Spectroscopic properties of the 16 binary TFB conformers at B2PLYP-D3BJ/6-311++G(2d,p).....                                                                                      | S4     |
| <b>Table S4.</b> Spectroscopic properties of the 16 binary TFB conformers at B2PLYP-D3BJ/def2-TZVP.....                                                                                           | S5     |
| <b>Table S5.</b> Spectroscopic properties of the 16 binary TFB conformers at MP2/6-311++G(2d,p).....                                                                                              | S5     |
| <b>Table S6-S10.</b> Experimental transition frequencies of the five observed binary TFB conformers.....                                                                                          | S6-S38 |
| <b>Table S11.</b> Comparison of the experimental and theoretical rotational constants.....                                                                                                        | S39    |
| <b>Table S12.</b> The SAPT decomposition of the six aliphatic alcohol homodimers and water homodimer.....                                                                                         | S40    |
| <b>Figure S1.</b> Average absolute percentage deviations (AAPD) between experimental and calculated rotational constants of the five observed binary TFB conformers at five levels of theory..... | S40    |
| <b>Figure S2.</b> The modified kinetic-thermodynamic model for conformational abundances in a jet.....                                                                                            | S41    |
| <b>Figure S3.</b> The QTAIM analyses results of the five observed binary TFB conformers.....                                                                                                      | S42    |
| <b>Figure S4.</b> Comparison of the SAPT decompositions of a range of alcohol dimers.....                                                                                                         | S43    |

**Table S1.** Theoretical spectroscopic parameters of the 102 conformers of the TFB dimer calculated at the B3LYP-D3BJ/def2-TZVP level of theory.<sup>a</sup>

| Conformers                | Energy ordering | $\Delta E$ | $\Delta E_0$ | <i>A</i> | <i>B</i> | <i>C</i> | $ \mu_a $ | $ \mu_b $ | $ \mu_c $ |
|---------------------------|-----------------|------------|--------------|----------|----------|----------|-----------|-----------|-----------|
| <b>I(TG-g-/TG+g+)</b>     | 1               | 0.0        | 0.0          | 565      | 299      | 272      | 1.1       | 1.8       | 1.3       |
| <b>II(TG+g+/TG+g+)</b>    | 2               | 2.2        | 1.2          | 539      | 281      | 234      | 0.5       | 3.4       | 2.0       |
| <b>III(G-G-g+/TG-g-)</b>  | 3               | 1.6        | 1.6          | 608      | 280      | 269      | 0.5       | 1.2       | 1.1       |
| <b>IV(TG-g-/TG+t)</b>     | 4               | 3.2        | 1.8          | 512      | 320      | 257      | 0.9       | 5.0       | 2.1       |
| <b>V(TG+t/TG+t)</b>       | 5               | 4.2        | 2.4          | 636      | 247      | 196      | 6.7       | 3.3       | 0.2       |
| <b>VI(TG-g-/TG+g+)</b>    | 6               | 3.8        | 2.6          | 555      | 249      | 202      | 0.1       | 2.9       | 0.5       |
| <b>VII(TG-g-/G-G-t)</b>   | 7               | 3.1        | 2.8          | 614      | 302      | 265      | 0.1       | 2.2       | 0.9       |
| <b>VIII(TG-g-/G+G+g-)</b> | 8               | 2.7        | 2.8          | 823      | 199      | 180      | 0.0       | 0.9       | 0.0       |
| <b>IX(TG-g-/G-G-g+)</b>   | 9               | 2.8        | 3.0          | 604      | 323      | 263      | 0.4       | 2.5       | 0.1       |
| <b>X(G+G+g-/G-G-t)</b>    | 10              | 2.8        | 3.0          | 679      | 268      | 264      | 0.3       | 0.6       | 1.3       |
| <b>XI(TG-g-/TG-t)</b>     | 11              | 4.8        | 3.4          | 763      | 195      | 186      | 2.4       | 1.1       | 1.4       |
| <b>XII(G+G+g-/TG-g-)</b>  | 12              | 3.5        | 3.5          | 788      | 206      | 195      | 1.4       | 1.7       | 1.0       |
| <b>XIII(TG-g-/TTg-)</b>   | 13              | 3.4        | 3.5          | 515      | 312      | 233      | 0.7       | 3.0       | 2.0       |
| <b>XIV(G+G+t/TG-g-)</b>   | 14              | 4.5        | 3.6          | 567      | 290      | 243      | 0.0       | 3.1       | 0.9       |
| <b>XV(TG-g-/G+G+t)</b>    | 15              | 4.7        | 3.6          | 818      | 230      | 216      | 0.7       | 1.2       | 0.2       |
| <b>XVI(TG-g-/G-G-g+)</b>  | 16              | 2.9        | 3.6          | 604      | 252      | 204      | 0.4       | 0.7       | 0.3       |
| TG-g-/G+G+t <sup>b</sup>  | 17              | 4.9        | 3.8          | 589      | 267      | 223      | 0.1       | 3.4       | 2.1       |
| TG-g-/TG-g+               | 18              | 5.0        | 4.1          | 541      | 337      | 265      | 0.8       | 1.5       | 1.5       |
| TG-t/TG+t                 | 19              | 4.6        | 4.1          | 577      | 231      | 189      | 5.8       | 3.8       | 0.1       |
| TG+g+/TG-t                | 20              | 5.6        | 4.1          | 1007     | 156      | 145      | 2.6       | 0.7       | 0.2       |
| TG-t/TG+t                 | 21              | 5.0        | 4.2          | 686      | 197      | 166      | 5.6       | 5.0       | 0.2       |
| TG-g-/TG-g-               | 22              | 6.3        | 4.3          | 681      | 239      | 234      | 0.3       | 1.5       | 0.3       |
| G+G+t/TG+t                | 23              | 4.7        | 4.3          | 548      | 313      | 253      | 1.2       | 4.7       | 1.0       |
| TG-g-/TG-t                | 24              | 5.9        | 4.3          | 1006     | 160      | 148      | 1.8       | 1.4       | 0.4       |
| TG-g-/TG-t                | 25              | 5.2        | 4.4          | 528      | 292      | 242      | 1.9       | 3.9       | 2.7       |
| G+G+g-/TG-g-              | 26              | 5.9        | 4.4          | 750      | 220      | 207      | 1.2       | 1.8       | 0.7       |
| TG-g-/G-G-g+              | 27              | 4.3        | 4.5          | 568      | 300      | 222      | 0.3       | 2.0       | 0.5       |
| G+G+g-/G+G+g-             | 28              | 4.6        | 4.5          | 712      | 259      | 237      | 0.0       | 2.0       | 0.4       |
| G+G+g-/TG+t               | 29              | 3.6        | 4.5          | 991      | 172      | 157      | 2.3       | 1.9       | 0.6       |
| TG-t/TG+t                 | 30              | 5.5        | 4.6          | 603      | 265      | 202      | 6.3       | 4.0       | 1.7       |
| TG-g-/TG+t                | 31              | 6.8        | 4.7          | 742      | 185      | 172      | 1.9       | 3.2       | 1.6       |
| G+G+g-/TG+t               | 32              | 6.2        | 4.7          | 881      | 184      | 170      | 1.8       | 1.7       | 1.0       |
| TG-g+/G-G-g+              | 33              | 5.4        | 4.9          | 870      | 205      | 186      | 0.4       | 0.8       | 0.2       |
| TG-g-/G+G+t               | 34              | 4.7        | 4.9          | 759      | 197      | 176      | 1.2       | 1.9       | 1.6       |
| G+G+t/G+G+g-              | 35              | 6.5        | 5.0          | 673      | 254      | 216      | 0.4       | 1.6       | 0.7       |
| TG-g-/G+G+g+              | 36              | 4.6        | 5.0          | 735      | 229      | 213      | 2.4       | 0.8       | 0.5       |
| TG-g-/TTg+                | 37              | 5.0        | 5.1          | 585      | 248      | 192      | 0.4       | 3.1       | 0.0       |
| TG-g+/TG-t                | 38              | 7.0        | 5.1          | 588      | 267      | 260      | 0.8       | 3.8       | 2.9       |
| TG-g-/TG-g-               | 39              | 6.7        | 5.2          | 740      | 170      | 151      | 2.2       | 1.0       | 0.4       |
| TG+g-/TG-g-               | 40              | 6.2        | 5.2          | 588      | 252      | 241      | 1.3       | 2.0       | 2.8       |
| TG+g+/G+G+g+              | 41              | 6.5        | 5.3          | 560      | 315      | 264      | 2.2       | 4.1       | 1.5       |
| G+G+g-/G-G-g+             | 42              | 5.9        | 5.3          | 963      | 208      | 191      | 0.6       | 0.2       | 0.2       |
| TG+t/TG+g+                | 43              | 4.4        | 5.4          | 559      | 244      | 191      | 4.9       | 3.0       | 0.9       |
| G-G-g+/TG+t               | 44              | 7.7        | 5.5          | 937      | 179      | 165      | 2.9       | 1.2       | 0.9       |
| TG-g-/G-Tg-               | 45              | 6.2        | 5.5          | 578      | 266      | 204      | 0.8       | 2.4       | 0.3       |
| TG+t/TG+t                 | 46              | 6.3        | 5.6          | 689      | 176      | 154      | 4.9       | 4.9       | 1.0       |
| TG+t/TG-g-                | 47              | 7.4        | 5.7          | 581      | 241      | 186      | 5.3       | 3.4       | 1.3       |
| TG+t/G-G-g+               | 48              | 7.3        | 5.7          | 790      | 152      | 137      | 2.5       | 2.6       | 0.2       |
| G-G-g+/TG-g-              | 49              | 6.2        | 5.7          | 701      | 232      | 224      | 1.6       | 1.6       | 2.4       |
| TG-g-/G+G+t               | 50              | 5.9        | 5.8          | 886      | 173      | 158      | 2.0       | 1.4       | 0.5       |
| TG-g-/TG+g+               | 51              | 6.3        | 5.8          | 532      | 299      | 211      | 0.6       | 4.0       | 0.9       |
| TG+g+/TTg+                | 52              | 7.9        | 5.8          | 611      | 237      | 208      | 1.1       | 1.3       | 1.4       |

|               |     |      |     |     |     |     |     |     |     |
|---------------|-----|------|-----|-----|-----|-----|-----|-----|-----|
| TG+t/G-G-t    | 53  | 6.4  | 6.0 | 713 | 235 | 197 | 5.8 | 2.4 | 0.6 |
| G-G-t/TG-g-   | 54  | 7.0  | 6.1 | 601 | 241 | 205 | 0.2 | 3.0 | 0.6 |
| TG+g+/TG-g+   | 55  | 7.6  | 6.1 | 547 | 294 | 245 | 0.8 | 0.8 | 1.0 |
| TG+g+/TG-g-   | 56  | 7.2  | 6.2 | 738 | 167 | 149 | 1.8 | 1.4 | 2.3 |
| TG+g-/TG+g+   | 57  | 7.2  | 6.2 | 628 | 257 | 200 | 1.1 | 2.7 | 0.9 |
| TG+g+/G-Tg-   | 58  | 7.8  | 6.4 | 612 | 236 | 188 | 0.4 | 1.7 | 2.3 |
| G-G-g+/TG+t   | 59  | 8.1  | 6.4 | 624 | 269 | 245 | 0.6 | 2.2 | 2.1 |
| TG+g+/G-G+g-  | 60  | 7.4  | 6.5 | 578 | 307 | 246 | 1.9 | 0.1 | 1.3 |
| TG+g-/G-G+g-  | 61  | 6.9  | 6.5 | 732 | 207 | 181 | 1.6 | 1.1 | 0.6 |
| TG-t/TG+g+    | 62  | 7.3  | 6.6 | 701 | 159 | 141 | 3.8 | 3.9 | 1.4 |
| G-G-g+/TG+g+  | 63  | 9.2  | 6.7 | 722 | 244 | 201 | 0.8 | 2.1 | 0.3 |
| TG+t/TG+g+    | 64  | 7.7  | 6.7 | 689 | 162 | 141 | 4.1 | 4.7 | 0.9 |
| G+G+g-/TG-g-  | 65  | 8.7  | 6.8 | 857 | 166 | 151 | 2.1 | 0.2 | 1.5 |
| TG-g+/TG-g-   | 66  | 7.8  | 6.8 | 516 | 299 | 245 | 0.4 | 3.4 | 1.9 |
| G-G-g+/TG-g-  | 67  | 9.0  | 6.9 | 785 | 169 | 151 | 1.5 | 1.1 | 0.7 |
| G+G+g-/G-G-g+ | 68  | 7.6  | 6.9 | 717 | 276 | 225 | 0.5 | 0.6 | 2.1 |
| TG+g+/TG+g+   | 69  | 6.9  | 7.0 | 521 | 273 | 200 | 1.0 | 3.9 | 0.5 |
| TG-g-/G+G+g-  | 70  | 9.3  | 7.1 | 596 | 297 | 226 | 0.7 | 1.8 | 2.5 |
| TG-g-/G+G+g+  | 71  | 7.7  | 7.1 | 994 | 158 | 147 | 3.3 | 2.9 | 0.9 |
| TG-g-/G-G-t   | 72  | 8.0  | 7.2 | 909 | 168 | 154 | 1.3 | 1.6 | 2.0 |
| TG+t/G-G-t    | 73  | 7.7  | 7.2 | 840 | 140 | 128 | 2.6 | 4.7 | 0.3 |
| TG+g+/TTt     | 74  | 10.1 | 7.5 | 913 | 155 | 145 | 2.5 | 0.7 | 0.0 |
| TG+g+/TG+g+   | 75  | 8.6  | 7.5 | 549 | 343 | 270 | 0.0 | 0.0 | 0.1 |
| TG+g-/G-G-g+  | 76  | 9.7  | 7.5 | 898 | 159 | 154 | 1.9 | 2.2 | 2.1 |
| TG+t/G+G+t    | 77  | 7.7  | 7.5 | 643 | 203 | 172 | 2.6 | 4.2 | 2.2 |
| TG+t/G+G+t    | 78  | 9.8  | 7.5 | 900 | 137 | 129 | 2.8 | 3.6 | 0.8 |
| TG-g+/TG-g-   | 79  | 9.5  | 7.5 | 723 | 205 | 195 | 1.7 | 0.7 | 1.9 |
| TG-g-/G-G-g-  | 80  | 8.5  | 7.6 | 622 | 272 | 255 | 0.7 | 1.5 | 1.8 |
| TG+g+/TTt     | 81  | 8.7  | 7.7 | 508 | 279 | 216 | 0.4 | 2.3 | 1.7 |
| TG+g-/TG+g+   | 82  | 9.2  | 7.7 | 550 | 252 | 195 | 1.0 | 3.6 | 0.3 |
| TTt/TG+t      | 83  | 9.6  | 7.7 | 667 | 224 | 184 | 6.3 | 3.3 | 1.7 |
| TG+t/G+G+t    | 84  | 10.0 | 7.8 | 793 | 189 | 168 | 5.1 | 3.5 | 0.8 |
| TG-t/TG+t     | 85  | 8.8  | 7.8 | 746 | 150 | 135 | 2.5 | 4.7 | 0.6 |
| TG+g+/G-G-g-  | 86  | 9.5  | 7.8 | 530 | 366 | 252 | 1.9 | 3.6 | 3.1 |
| TG-g+/G+G+g+  | 87  | 9.4  | 8.1 | 628 | 271 | 266 | 1.1 | 2.3 | 3.5 |
| TG-g-/G+Tg+   | 88  | 8.9  | 8.2 | 696 | 211 | 182 | 1.5 | 1.3 | 0.9 |
| G+G+g-/G+G+g- | 89  | 8.4  | 8.2 | 813 | 218 | 192 | 0.2 | 1.2 | 0.1 |
| G+G+t/TG-g-   | 90  | 8.3  | 8.4 | 594 | 339 | 267 | 0.5 | 0.0 | 0.4 |
| TG-g-/G+G-g+  | 91  | 10.1 | 8.4 | 587 | 351 | 261 | 3.0 | 2.0 | 0.1 |
| TG-g-/TTg-    | 92  | 8.7  | 8.4 | 719 | 178 | 154 | 2.1 | 0.8 | 0.5 |
| TG+g+/G-G-g+  | 93  | 9.6  | 8.4 | 759 | 213 | 202 | 0.1 | 0.3 | 1.7 |
| G+G+t/TG+t    | 94  | 9.0  | 8.5 | 543 | 348 | 245 | 2.1 | 5.1 | 0.2 |
| G+G+g-/TG+t   | 95  | 9.9  | 8.5 | 583 | 288 | 251 | 0.4 | 3.5 | 2.7 |
| TG-g-/TTg-    | 96  | 9.6  | 8.5 | 643 | 200 | 183 | 0.7 | 0.4 | 0.8 |
| TG-g-/G+G+g-  | 97  | 9.9  | 8.8 | 595 | 337 | 254 | 0.2 | 1.1 | 1.5 |
| TG+t/TTt      | 98  | 8.8  | 9.0 | 497 | 258 | 187 | 5.3 | 4.1 | 0.5 |
| TG-g-/G-Tg+   | 99  | 11.1 | 9.1 | 765 | 196 | 179 | 1.9 | 1.2 | 0.2 |
| TG-g-/G+G+g-  | 100 | 9.6  | 9.2 | 964 | 162 | 151 | 4.2 | 1.6 | 0.6 |
| G+G+g-/G+G+g- | 101 | 10.5 | 9.5 | 728 | 263 | 214 | 0.8 | 1.4 | 0.8 |
| G+G+t/TG+t    | 102 | 10.1 | 9.7 | 553 | 281 | 217 | 0.7 | 5.1 | 0.8 |

<sup>a</sup> $\Delta E$  and  $\Delta E_0$  denote the raw and ZPE corrected relative energies (in kJ mol<sup>-1</sup>), respectively. and  $A$ ,  $B$ , and  $C$  are the rotational constants (in MHz).  $|\mu_{g_i}|$  ( $g = a, b, c$ ) are the magnitudes of the electric dipole moment components (in Debye).

<sup>b</sup>For conciseness, we do not add energy ordering ranks to conformers after **XIV**.

**Table S2.** Theoretical spectroscopic parameters of the sixteen conformers of the TFB dimer calculated at the B3LYP-D3BJ/6-311++G(2d,p) level of theory.<sup>a</sup>

| Conformers         | $\Delta E$ | $\Delta E_0$ | $A$ | $B$ | $C$ | $ \mu_a $ | $ \mu_b $ | $ \mu_c $ |
|--------------------|------------|--------------|-----|-----|-----|-----------|-----------|-----------|
| I(TG-g-/TG+g+)     | 0.0        | 0.0          | 561 | 304 | 275 | 1.1       | 1.9       | 1.3       |
| II(TG+g+/TG+g+)    | 1.9        | 1.0          | 538 | 285 | 237 | 0.7       | 3.4       | 2.0       |
| III(G-G-g+/TG-g-)  | 1.0        | 1.1          | 605 | 284 | 272 | 0.5       | 1.3       | 1.0       |
| IV(TG-g-/TG+t)     | 2.5        | 1.2          | 509 | 326 | 260 | 0.9       | 5.1       | 2.0       |
| V(TG+t/TG+t)       | 3.7        | 2.0          | 638 | 250 | 198 | 6.9       | 3.3       | 0.2       |
| VI(TG-g-/TG+g+)    | 3.6        | 2.4          | 554 | 252 | 204 | 0.0       | 2.9       | 0.5       |
| VII(TG-g-/G-G-t)   | 2.4        | 2.6          | 602 | 328 | 266 | 0.4       | 2.6       | 0.2       |
| VIII(TG-g-/G+G+g-) | 2.8        | 2.9          | 816 | 200 | 181 | 0.1       | 0.9       | 0.0       |
| IX(TG-g-/G-G-g+)   | 2.4        | 2.6          | 602 | 328 | 266 | 0.4       | 2.6       | 0.2       |
| X(G+G+g-/G-G-t)    | 2.1        | 2.3          | 675 | 271 | 267 | 0.3       | 0.6       | 1.2       |
| XI(TG-g-/TG-t)     | 5.5        | 4.0          | 743 | 200 | 192 | 2.5       | 0.9       | 1.5       |
| XII(G+G+g-/TG-g-)  | 3.1        | 3.4          | 762 | 221 | 208 | 1.2       | 1.8       | 0.8       |
| XIII(TG-g-/TTg-)   | 3.9        | 3.2          | 512 | 323 | 239 | 0.8       | 3.0       | 2.0       |
| XIV(G+G+t/TG-g-)   | 3.8        | 2.7          | 563 | 297 | 248 | 0.1       | 3.1       | 1.0       |
| XV(TG-g-/G+G+t)    | 2.9        | 3.6          | 814 | 232 | 218 | 0.8       | 1.2       | 0.2       |
| XVI(TG-g-/G-G-g+)  | 5.1        | 3.9          | 601 | 253 | 205 | 0.3       | 0.7       | 0.3       |

<sup>a</sup> $\Delta E$  and  $\Delta E_0$  denote the raw and ZPE corrected relative energies (in kJ mol<sup>-1</sup>), respectively. and  $A$ ,  $B$ , and  $C$  are the rotational constants (in MHz).  $|\mu_g|$  ( $g = a, b, c$ ) are the magnitudes of the electric dipole moment components (in Debye).

**Table S3.** Theoretical spectroscopic parameters of the sixteen conformers of the TFB dimer calculated at the B2PLYP-D3BJ/6-311++G(2d,p) level of theory.<sup>a</sup>

| Conformers         | $\Delta E$ | $\Delta E_0$ | $A$ | $B$ | $C$ | $ \mu_a $ | $ \mu_b $ | $ \mu_c $ |
|--------------------|------------|--------------|-----|-----|-----|-----------|-----------|-----------|
| I(TG-g-/TG+g+)     | 0.0        | 0.0          | 561 | 307 | 277 | 1.0       | 2.0       | 1.3       |
| II(TG+g+/TG+g+)    | 1.7        | 0.8          | 542 | 283 | 237 | 0.7       | 3.4       | 2.1       |
| III(G-G-g+/TG-g-)  | 1.4        | 1.2          | 605 | 285 | 272 | 0.4       | 1.3       | 1.0       |
| IV(TG-g-/TG+t)     | 1.4        | 0.1          | 509 | 330 | 260 | 1.0       | 5.2       | 2.0       |
| V(TG+t/TG+t)       | 2.6        | 1.1          | 642 | 249 | 198 | 6.9       | 3.3       | 0.2       |
| VI(TG-g-/TG+g+)    | 3.0        | 1.8          | 555 | 253 | 205 | 0.0       | 2.9       | 0.5       |
| VII(TG-g-/G-G-t)   | 1.8        | 2.2          | 604 | 331 | 269 | 0.4       | 2.5       | 0.1       |
| VIII(TG-g-/G+G+g-) | 2.7        | 2.8          | 819 | 202 | 183 | 0.1       | 0.9       | 0.1       |
| IX(TG-g-/G-G-g+)   | 1.8        | 2.2          | 604 | 332 | 269 | 0.4       | 2.5       | 0.1       |
| X(G+G+g-/G-G-t)    | 1.9        | 1.9          | 683 | 271 | 266 | 0.4       | 0.7       | 1.2       |
| XI(TG-g-/TG-t)     | 5.1        | 3.5          | 760 | 196 | 188 | 2.4       | 1.1       | 1.6       |
| XII(G+G+g-/TG-g-)  | 3.6        | 3.9          | 763 | 218 | 206 | 1.2       | 1.8       | 0.9       |
| XIII(TG-g-/TTg-)   | 3.9        | 3.1          | 514 | 325 | 241 | 0.7       | 3.0       | 2.0       |
| XIV(G+G+t/TG-g-)   | 3.3        | 2.2          | 571 | 293 | 246 | 0.2       | 3.1       | 1.0       |
| XV(TG-g-/G+G+t)    | 3.0        | 3.6          | 812 | 233 | 220 | 0.9       | 1.2       | 0.2       |
| XVI(TG-g-/G-G-g+)  | 4.6        | 3.2          | 610 | 252 | 204 | 0.3       | 0.7       | 0.2       |

<sup>a</sup> $\Delta E$  and  $\Delta E_0$  denote the raw and ZPE corrected relative energies (in kJ mol<sup>-1</sup>), respectively. and  $A$ ,  $B$ , and  $C$  are the rotational constants (in MHz).  $|\mu_g|$  ( $g = a, b, c$ ) are the magnitudes of the electric dipole moment components (in Debye).

**Table S4.** Theoretical spectroscopic parameters of the sixteen conformers of the TFB dimer calculated at the B2PLYP-D3BJ/def2-TZVP level of theory.<sup>a</sup>

| Conformers         | $\Delta E$ | $\Delta E_0$ | $A$ | $B$ | $C$ | $ \mu_a $ | $ \mu_b $ | $ \mu_c $ |
|--------------------|------------|--------------|-----|-----|-----|-----------|-----------|-----------|
| I(TG-g-/TG+g+)     | 0.0        | 0.0          | 567 | 298 | 270 | 1.1       | 1.8       | 1.4       |
| II(TG+g+/TG+g+)    | 1.7        | 0.8          | 543 | 278 | 233 | 0.5       | 3.4       | 2.0       |
| III(G-G-g+/TG-g-)  | 1.9        | 1.8          | 609 | 279 | 268 | 0.4       | 1.3       | 1.1       |
| IV(TG-g-/TG+t)     | 2.0        | 0.7          | 516 | 318 | 256 | 0.9       | 5.0       | 2.1       |
| V(TG+t/TG+t)       | 2.8        | 1.2          | 639 | 245 | 195 | 6.7       | 3.4       | 0.2       |
| VI(TG-g-/TG+g+)    | 2.6        | 1.6          | 558 | 248 | 201 | 0.1       | 2.9       | 0.4       |
| VII(TG-g-/G-G-t)   | 2.7        | 2.5          | 619 | 300 | 263 | 0.1       | 2.2       | 1.1       |
| VIII(TG-g-/G+G+g-) | 2.1        | 2.4          | 829 | 198 | 181 | 0.0       | 0.9       | 0.1       |
| IX(TG-g-/G-G-g+)   | 2.5        | 2.8          | 608 | 321 | 261 | 0.4       | 2.5       | 0.1       |
| X(G+G+g-/G-G-t)    | 2.6        | 2.8          | 686 | 267 | 262 | 0.4       | 0.7       | 1.3       |
| XI(TG-g-/TG-t)     | 3.9        | 2.7          | 786 | 190 | 181 | 2.3       | 1.2       | 1.5       |
| XII(G+G+g-/TG-g-)  | 3.5        | 3.6          | 787 | 207 | 195 | 1.3       | 1.8       | 1.0       |
| XIII(TG-g-/TTg-)   | 4.1        | 3.3          | 519 | 307 | 231 | 0.6       | 3.0       | 2.0       |
| XIV(G+G+t/TG-g-)   | 3.9        | 2.8          | 576 | 282 | 238 | 0.1       | 3.2       | 0.9       |
| XV(TG-g-/G+G+t)    | 2.9        | 3.5          | 821 | 229 | 216 | 0.8       | 1.3       | 0.2       |
| XVI(TG-g-/G-G-g+)  | 3.9        | 3.0          | 618 | 247 | 201 | 0.3       | 0.7       | 0.2       |

<sup>a</sup> $\Delta E$  and  $\Delta E_0$  denote the raw and ZPE corrected relative energies (in  $\text{kJ mol}^{-1}$ ), respectively. and  $A$ ,  $B$ , and  $C$  are the rotational constants (in MHz).  $|\mu_g|$  ( $g = a, b, c$ ) are the magnitudes of the electric dipole moment components (in Debye).

**Table S5.** Theoretical spectroscopic parameters of the sixteen conformers of the TFB dimer calculated at the MP2/6-311++G(2d,p) level of theory.<sup>a</sup>

| Conformers         | $\Delta E$ | $\Delta E_0$ | $A$ | $B$ | $C$ | $ \mu_a $ | $ \mu_b $ | $ \mu_c $ |
|--------------------|------------|--------------|-----|-----|-----|-----------|-----------|-----------|
| I(TG-g-/TG+g+)     | 0.0        | 0.7          | 560 | 312 | 280 | 1.0       | 1.9       | 1.4       |
| II(TG+g+/TG+g+)    | 1.9        | 1.9          | 543 | 287 | 239 | 0.7       | 3.4       | 2.1       |
| III(G-G-g+/TG-g-)  | 2.5        | 2.9          | 601 | 292 | 276 | 0.4       | 1.4       | 1.0       |
| IV(TG-g-/TG+t)     | 0.3        | 0.0          | 508 | 339 | 263 | 1.2       | 5.2       | 2.1       |
| V(TG+t/TG+t)       | 2.2        | 1.6          | 644 | 252 | 200 | 6.9       | 3.2       | 0.3       |
| VI(TG-g-/TG+g+)    | 3.2        | 2.9          | 556 | 258 | 208 | 0.2       | 2.9       | 0.5       |
| VII(TG-g-/G-G-t)   | 0.9        | 2.2          | 605 | 341 | 275 | 0.5       | 2.4       | 0.1       |
| VIII(TG-g-/G+G+g-) | 2.6        | 3.8          | 819 | 206 | 187 | 0.2       | 0.9       | 0.2       |
| IX(TG-g-/G-G-g+)   | 0.9        | 2.2          | 605 | 341 | 275 | 0.5       | 2.4       | 0.1       |
| X(G+G+g-/G-G-t)    | 2.1        | 2.8          | 691 | 277 | 268 | 0.6       | 1.0       | 1.2       |
| XI(TG-g-/TG-t)     | 5.2        | 4.3          | 698 | 218 | 210 | 2.4       | 0.6       | 2.1       |
| XII(G+G+g-/TG-g-)  | 5.3        | 6.5          | 744 | 228 | 216 | 1.0       | 1.9       | 0.8       |
| XIII(TG-g-/TTg-)   | 4.1        | 4.1          | 513 | 334 | 246 | 0.6       | 3.0       | 2.0       |
| XIV(G+G+t/TG-g-)   | 3.5        | 3.2          | 576 | 295 | 248 | 0.3       | 3.1       | -1.0      |
| XV(TG-g-/G+G+t)    | 3.3        | 4.8          | 811 | 236 | 222 | 1.1       | 1.3       | 0.2       |
| XVI(TG-g-/G-G-g+)  | 4.7        | 4.3          | 612 | 256 | 207 | 0.2       | 0.7       | 0.3       |

<sup>a</sup> $\Delta E$  and  $\Delta E_0$  denote the raw and ZPE corrected relative energies (in  $\text{kJ mol}^{-1}$ ), respectively. and  $A$ ,  $B$ , and  $C$  are the rotational constants (in MHz).  $|\mu_g|$  ( $g = a, b, c$ ) are the magnitudes of the electric dipole moment components (in Debye).

**Table S6.** Experimental transition frequencies of the observed parent species of conformer **I** of the TFB dimer.

| $J'$ | $Ka'$ | $Kc'$ | $J''$ | $Ka''$ | $Kc''$ | $\nu_{\text{obs}}/\text{MHz}$ | $\Delta\nu_{\text{obs-calc}}/\text{MHz}$ |
|------|-------|-------|-------|--------|--------|-------------------------------|------------------------------------------|
| 3    | 1     | 2     | 2     | 0      | 2      | 2043.9537                     | -0.0001                                  |
| 3    | 2     | 2     | 2     | 1      | 1      | 2492.9617                     | 0.0000                                   |
| 3    | 2     | 2     | 2     | 1      | 2      | 2573.2380                     | 0.0000                                   |
| 3    | 2     | 1     | 2     | 1      | 2      | 2582.5784                     | -0.0027                                  |
| 3    | 2     | 1     | 2     | 1      | 1      | 2502.3080                     | 0.0033                                   |
| 3    | 3     | 1     | 2     | 2      | 0      | 3102.4381                     | 0.0073                                   |
| 3    | 3     | 1     | 2     | 2      | 1      | 3104.3118                     | 0.0001                                   |
| 3    | 3     | 0     | 2     | 2      | 0      | 3102.5138                     | 0.0001                                   |
| 3    | 3     | 0     | 2     | 2      | 1      | 3104.3880                     | -0.0065                                  |
| 4    | 0     | 4     | 3     | 0      | 3      | 2219.0200                     | 0.0050                                   |
| 4    | 0     | 4     | 3     | 1      | 3      | 2006.0320                     | -0.0096                                  |
| 4    | 1     | 4     | 3     | 0      | 3      | 2393.2226                     | -0.0021                                  |
| 4    | 1     | 4     | 3     | 1      | 3      | 2180.2410                     | -0.0103                                  |
| 4    | 1     | 3     | 3     | 0      | 3      | 2660.2213                     | 0.0001                                   |
| 4    | 1     | 3     | 3     | 1      | 2      | 2286.7813                     | 0.0000                                   |
| 4    | 2     | 3     | 3     | 2      | 2      | 2235.8317                     | -0.0002                                  |
| 4    | 2     | 3     | 3     | 1      | 2      | 3011.8905                     | -0.0084                                  |
| 4    | 2     | 3     | 3     | 1      | 3      | 3172.3655                     | 0.0001                                   |
| 4    | 2     | 2     | 3     | 1      | 3      | 3199.9860                     | 0.0091                                   |
| 4    | 2     | 2     | 3     | 2      | 1      | 2254.1002                     | -0.0002                                  |
| 4    | 2     | 2     | 3     | 1      | 2      | 3039.5104                     | 0.0000                                   |
| 4    | 3     | 2     | 3     | 2      | 1      | 3657.8154                     | -0.0032                                  |
| 4    | 3     | 2     | 3     | 2      | 2      | 3667.1617                     | 0.0001                                   |
| 4    | 3     | 1     | 3     | 2      | 2      | 3667.7372                     | -0.0028                                  |
| 4    | 3     | 1     | 3     | 2      | 1      | 3658.3972                     | 0.0001                                   |
| 4    | 4     | 1     | 3     | 3      | 0      | 4232.8137                     | 0.0004                                   |
| 4    | 4     | 0     | 3     | 3      | 0      | 4232.8165                     | 0.0002                                   |
| 4    | 4     | 0     | 3     | 3      | 1      | 4232.9003                     | 0.0011                                   |
| 5    | 0     | 5     | 4     | 0      | 4      | 2761.4902                     | -0.0001                                  |
| 5    | 0     | 5     | 4     | 1      | 4      | 2587.2814                     | 0.0008                                   |
| 5    | 1     | 5     | 4     | 1      | 4      | 2722.2967                     | -0.0001                                  |
| 5    | 1     | 5     | 4     | 0      | 4      | 2896.5130                     | 0.0065                                   |
| 5    | 1     | 4     | 4     | 2      | 2      | 2101.6220                     | 0.0029                                   |
| 5    | 1     | 4     | 4     | 1      | 3      | 2854.3481                     | 0.0000                                   |
| 5    | 1     | 4     | 4     | 0      | 4      | 3295.5545                     | 0.0001                                   |
| 5    | 2     | 4     | 4     | 2      | 3      | 2792.4100                     | -0.0099                                  |
| 5    | 2     | 4     | 4     | 1      | 3      | 3517.5393                     | 0.0018                                   |
| 5    | 2     | 4     | 4     | 1      | 4      | 3784.5342                     | 0.0002                                   |
| 5    | 2     | 3     | 4     | 2      | 2      | 2827.4897                     | -0.0001                                  |
| 5    | 2     | 3     | 4     | 1      | 3      | 3580.2189                     | 0.0000                                   |
| 5    | 2     | 3     | 4     | 1      | 4      | 3847.2168                     | 0.0013                                   |
| 5    | 3     | 3     | 4     | 2      | 2      | 4205.9624                     | -0.0046                                  |
| 5    | 3     | 3     | 4     | 3      | 2      | 2802.2488                     | 0.0001                                   |
| 5    | 3     | 3     | 4     | 2      | 3      | 4233.5786                     | 0.0001                                   |
| 5    | 3     | 2     | 4     | 3      | 1      | 2803.9712                     | 0.0001                                   |
| 5    | 3     | 2     | 4     | 2      | 2      | 4208.2679                     | 0.0001                                   |
| 5    | 3     | 2     | 4     | 2      | 3      | 4235.8761                     | -0.0032                                  |
| 5    | 4     | 2     | 4     | 3      | 2      | 4792.8725                     | 0.0002                                   |
| 5    | 4     | 2     | 4     | 3      | 1      | 4792.2954                     | 0.0016                                   |
| 5    | 4     | 1     | 4     | 3      | 1      | 4792.3212                     | 0.0002                                   |
| 5    | 4     | 1     | 4     | 3      | 2      | 4792.8970                     | -0.0025                                  |
| 5    | 5     | 1     | 5     | 4      | 2      | 2561.4449                     | 0.0000                                   |

|   |   |   |   |   |   |           |         |
|---|---|---|---|---|---|-----------|---------|
| 5 | 5 | 1 | 4 | 4 | 1 | 5362.2498 | -0.0044 |
| 5 | 5 | 1 | 4 | 4 | 0 | 5362.2491 | -0.0021 |
| 5 | 5 | 0 | 5 | 4 | 1 | 2561.4178 | 0.0000  |
| 5 | 5 | 0 | 4 | 4 | 1 | 5362.2534 | -0.0009 |
| 6 | 0 | 6 | 5 | 0 | 5 | 3298.3252 | -0.0001 |
| 6 | 0 | 6 | 5 | 1 | 5 | 3163.3117 | 0.0025  |
| 6 | 1 | 6 | 5 | 1 | 5 | 3262.7276 | -0.0001 |
| 6 | 1 | 6 | 5 | 0 | 5 | 3397.7477 | 0.0038  |
| 6 | 1 | 5 | 5 | 2 | 3 | 2692.8410 | 0.0033  |
| 6 | 1 | 5 | 5 | 0 | 5 | 3952.7728 | 0.0002  |
| 6 | 1 | 5 | 5 | 1 | 4 | 3418.7085 | 0.0000  |
| 6 | 1 | 5 | 5 | 2 | 4 | 2755.5193 | 0.0001  |
| 6 | 2 | 5 | 5 | 1 | 4 | 4010.6379 | -0.0015 |
| 6 | 2 | 5 | 5 | 1 | 5 | 4409.6876 | 0.0003  |
| 6 | 2 | 5 | 5 | 2 | 4 | 3347.4500 | 0.0000  |
| 6 | 2 | 4 | 5 | 1 | 5 | 4529.8048 | 0.0035  |
| 6 | 2 | 4 | 5 | 1 | 4 | 4130.7534 | 0.0000  |
| 6 | 2 | 4 | 5 | 2 | 3 | 3404.8826 | 0.0000  |
| 6 | 3 | 4 | 5 | 2 | 3 | 4742.5469 | -0.0030 |
| 6 | 3 | 4 | 5 | 2 | 4 | 4805.2315 | 0.0002  |
| 6 | 3 | 3 | 5 | 3 | 2 | 3368.6075 | 0.0000  |
| 6 | 3 | 3 | 5 | 2 | 3 | 4749.3856 | 0.0002  |
| 6 | 3 | 3 | 5 | 2 | 4 | 4812.0689 | 0.0020  |
| 6 | 4 | 3 | 5 | 3 | 3 | 5352.9066 | 0.0002  |
| 6 | 4 | 3 | 5 | 3 | 2 | 5350.6054 | -0.0002 |
| 6 | 4 | 2 | 5 | 3 | 3 | 5353.0468 | 0.0049  |
| 6 | 4 | 2 | 5 | 3 | 2 | 5350.7470 | 0.0060  |
| 6 | 5 | 2 | 6 | 4 | 2 | 2559.6937 | 0.0002  |
| 6 | 5 | 2 | 5 | 4 | 2 | 5922.1122 | 0.0003  |
| 6 | 5 | 2 | 6 | 4 | 3 | 2559.8291 | 0.0000  |
| 6 | 5 | 2 | 5 | 4 | 1 | 5922.0850 | 0.0003  |
| 6 | 5 | 1 | 6 | 4 | 2 | 2559.6944 | -0.0003 |
| 6 | 5 | 1 | 5 | 4 | 2 | 5922.1133 | 0.0003  |
| 6 | 5 | 1 | 5 | 5 | 0 | 3360.6680 | 0.0000  |
| 6 | 5 | 1 | 6 | 4 | 3 | 2559.8301 | -0.0001 |
| 6 | 5 | 1 | 5 | 4 | 1 | 5922.0861 | 0.0003  |
| 6 | 6 | 1 | 6 | 5 | 2 | 3130.9617 | 0.0008  |
| 6 | 6 | 1 | 5 | 5 | 0 | 6491.6279 | 0.0001  |
| 6 | 6 | 1 | 6 | 5 | 1 | 3130.9601 | 0.0003  |
| 6 | 6 | 1 | 5 | 5 | 1 | 6491.6280 | 0.0001  |
| 6 | 6 | 0 | 6 | 5 | 2 | 3130.9612 | 0.0003  |
| 6 | 6 | 0 | 6 | 5 | 1 | 3130.9606 | 0.0008  |
| 6 | 6 | 0 | 5 | 5 | 1 | 6491.6269 | -0.0010 |
| 7 | 0 | 7 | 6 | 0 | 6 | 3831.0133 | 0.0005  |
| 7 | 0 | 7 | 6 | 1 | 6 | 3731.5954 | 0.0012  |
| 7 | 1 | 7 | 6 | 0 | 6 | 3900.9757 | -0.0013 |
| 7 | 1 | 7 | 6 | 1 | 6 | 3801.5583 | -0.0001 |
| 7 | 1 | 6 | 6 | 2 | 5 | 3386.8960 | 0.0070  |
| 7 | 1 | 6 | 6 | 1 | 5 | 3978.8199 | 0.0000  |
| 7 | 1 | 6 | 6 | 0 | 6 | 4633.2675 | 0.0004  |
| 7 | 2 | 6 | 6 | 3 | 4 | 2442.8760 | 0.0076  |
| 7 | 2 | 6 | 6 | 1 | 5 | 4492.5760 | -0.0046 |
| 7 | 2 | 6 | 6 | 2 | 5 | 3900.6497 | 0.0001  |
| 7 | 2 | 6 | 6 | 1 | 6 | 5047.6000 | -0.0092 |
| 7 | 2 | 5 | 6 | 1 | 6 | 5251.4686 | -0.0122 |

|   |   |   |   |   |   |           |         |
|---|---|---|---|---|---|-----------|---------|
| 7 | 2 | 5 | 6 | 3 | 4 | 2646.7470 | 0.0070  |
| 7 | 2 | 5 | 6 | 2 | 4 | 3984.4072 | 0.0000  |
| 7 | 2 | 5 | 6 | 1 | 5 | 4696.4522 | 0.0000  |
| 7 | 3 | 5 | 6 | 3 | 4 | 3926.0502 | 0.0000  |
| 7 | 3 | 5 | 6 | 2 | 4 | 5263.7173 | -0.0003 |
| 7 | 3 | 5 | 6 | 2 | 5 | 5383.8317 | 0.0001  |
| 7 | 3 | 4 | 6 | 3 | 3 | 3936.0358 | -0.0001 |
| 7 | 3 | 4 | 6 | 2 | 4 | 5280.5389 | 0.0002  |
| 7 | 3 | 4 | 6 | 2 | 5 | 5400.6527 | -0.0001 |
| 7 | 4 | 4 | 6 | 4 | 3 | 3924.4190 | 0.0000  |
| 7 | 4 | 4 | 6 | 3 | 3 | 5906.4172 | 0.0002  |
| 7 | 4 | 4 | 6 | 3 | 4 | 5913.2529 | 0.0003  |
| 7 | 4 | 3 | 6 | 3 | 3 | 5906.9115 | 0.0003  |
| 7 | 4 | 3 | 6 | 4 | 2 | 3924.7776 | 0.0000  |
| 7 | 4 | 3 | 6 | 3 | 4 | 5913.7470 | 0.0002  |
| 7 | 5 | 3 | 6 | 4 | 3 | 6481.7494 | 0.0002  |
| 7 | 5 | 3 | 7 | 4 | 4 | 2557.3301 | -0.0001 |
| 7 | 5 | 3 | 7 | 4 | 3 | 2556.8363 | 0.0002  |
| 7 | 5 | 3 | 6 | 4 | 2 | 6481.6138 | 0.0000  |
| 7 | 5 | 3 | 6 | 5 | 2 | 3921.9230 | 0.0028  |
| 7 | 5 | 2 | 6 | 4 | 3 | 6481.7550 | -0.0008 |
| 7 | 5 | 2 | 7 | 4 | 4 | 2557.3370 | 0.0002  |
| 7 | 5 | 2 | 6 | 4 | 2 | 6481.6205 | 0.0002  |
| 7 | 5 | 2 | 7 | 4 | 3 | 2556.8425 | -0.0002 |
| 7 | 5 | 2 | 6 | 5 | 1 | 3921.9256 | 0.0000  |
| 7 | 6 | 2 | 7 | 5 | 2 | 3129.5900 | 0.0003  |
| 7 | 6 | 2 | 6 | 6 | 1 | 3920.5557 | 0.0000  |
| 7 | 6 | 2 | 7 | 5 | 3 | 3129.5967 | 0.0004  |
| 7 | 6 | 1 | 6 | 6 | 0 | 3920.5557 | 0.0000  |
| 7 | 6 | 1 | 7 | 5 | 2 | 3129.5902 | 0.0004  |
| 7 | 6 | 1 | 7 | 5 | 3 | 3129.5966 | 0.0003  |
| 7 | 7 | 1 | 7 | 6 | 2 | 3700.4271 | -0.0012 |
| 7 | 7 | 1 | 7 | 6 | 1 | 3700.4285 | 0.0002  |
| 7 | 7 | 0 | 7 | 6 | 1 | 3700.4271 | -0.0012 |
| 7 | 7 | 0 | 7 | 6 | 2 | 3700.4286 | 0.0002  |
| 8 | 0 | 8 | 7 | 1 | 7 | 4291.4990 | 0.0016  |
| 8 | 0 | 8 | 7 | 0 | 7 | 4361.4615 | -0.0001 |
| 8 | 1 | 8 | 7 | 1 | 7 | 4338.9119 | -0.0001 |
| 8 | 1 | 8 | 7 | 0 | 7 | 4408.8870 | 0.0108  |
| 8 | 1 | 7 | 7 | 1 | 6 | 4533.5713 | 0.0000  |
| 8 | 1 | 7 | 7 | 0 | 7 | 5335.8255 | 0.0000  |
| 8 | 1 | 7 | 7 | 2 | 5 | 3815.9392 | 0.0002  |
| 8 | 1 | 7 | 7 | 2 | 6 | 4019.8130 | 0.0024  |
| 8 | 2 | 7 | 7 | 1 | 7 | 5697.8480 | 0.0106  |
| 8 | 2 | 7 | 7 | 2 | 6 | 4451.7868 | 0.0001  |
| 8 | 2 | 7 | 7 | 1 | 6 | 4965.5480 | 0.0007  |
| 8 | 2 | 6 | 7 | 3 | 5 | 3284.4145 | 0.0069  |
| 8 | 2 | 6 | 7 | 2 | 5 | 4563.7179 | 0.0000  |
| 8 | 2 | 6 | 7 | 1 | 6 | 5281.3501 | 0.0000  |
| 8 | 3 | 6 | 7 | 3 | 5 | 4487.8189 | 0.0001  |
| 8 | 3 | 6 | 7 | 2 | 5 | 5767.1305 | 0.0014  |
| 8 | 3 | 6 | 7 | 2 | 6 | 5971.0008 | 0.0001  |
| 8 | 3 | 5 | 7 | 3 | 4 | 4507.1188 | 0.0000  |
| 8 | 3 | 5 | 7 | 2 | 5 | 5803.2505 | 0.0002  |
| 8 | 3 | 5 | 7 | 2 | 6 | 6007.1252 | 0.0033  |



---

|   |   |   |   |   |   |           |         |
|---|---|---|---|---|---|-----------|---------|
| 8 | 4 | 5 | 7 | 4 | 4 | 4487.2554 | 0.0001  |
| 8 | 4 | 5 | 7 | 3 | 4 | 6457.6330 | -0.0035 |
| 8 | 4 | 5 | 7 | 3 | 5 | 6474.4578 | 0.0002  |
| 8 | 4 | 4 | 7 | 4 | 3 | 4488.2320 | 0.0001  |
| 8 | 4 | 4 | 7 | 3 | 4 | 6459.1074 | 0.0002  |
| 8 | 4 | 4 | 7 | 3 | 5 | 6475.9250 | -0.0033 |
| 8 | 5 | 4 | 8 | 4 | 4 | 2552.3031 | 0.0002  |
| 8 | 5 | 4 | 8 | 4 | 5 | 2553.7738 | 0.0001  |
| 8 | 5 | 4 | 7 | 5 | 3 | 4483.6988 | 0.0001  |
| 8 | 5 | 3 | 8 | 4 | 5 | 2553.8021 | 0.0001  |
| 8 | 5 | 3 | 7 | 5 | 2 | 4483.7206 | 0.0001  |
| 8 | 5 | 3 | 8 | 4 | 4 | 2552.3315 | 0.0002  |
| 8 | 6 | 3 | 7 | 6 | 2 | 4481.6485 | 0.0000  |
| 8 | 6 | 3 | 8 | 5 | 4 | 3127.5461 | 0.0000  |
| 8 | 6 | 3 | 8 | 5 | 3 | 3127.5180 | 0.0003  |
| 8 | 6 | 2 | 8 | 5 | 4 | 3127.5467 | 0.0003  |
| 8 | 6 | 2 | 7 | 6 | 1 | 4481.6487 | 0.0000  |
| 8 | 6 | 2 | 8 | 5 | 3 | 3127.5180 | 0.0000  |
| 8 | 7 | 2 | 8 | 6 | 3 | 3699.2469 | 0.0020  |
| 8 | 7 | 2 | 8 | 6 | 2 | 3699.2448 | 0.0002  |
| 8 | 7 | 2 | 7 | 7 | 1 | 4480.4600 | -0.0050 |
| 8 | 7 | 1 | 7 | 7 | 0 | 4480.4598 | -0.0052 |
| 8 | 7 | 1 | 8 | 6 | 3 | 3699.2451 | 0.0002  |
| 8 | 7 | 1 | 8 | 6 | 2 | 3699.2466 | 0.0020  |
| 8 | 8 | 1 | 8 | 7 | 2 | 4269.8630 | 0.0084  |
| 8 | 8 | 1 | 8 | 7 | 1 | 4269.8547 | 0.0001  |
| 8 | 8 | 0 | 8 | 7 | 1 | 4269.8630 | 0.0084  |
| 8 | 8 | 0 | 8 | 7 | 2 | 4269.8547 | 0.0001  |
| 9 | 0 | 9 | 8 | 1 | 8 | 4843.8110 | 0.0037  |
| 9 | 0 | 9 | 8 | 0 | 8 | 4891.2218 | 0.0000  |
| 9 | 1 | 9 | 8 | 0 | 8 | 4922.4017 | 0.0013  |
| 9 | 1 | 9 | 8 | 1 | 8 | 4874.9858 | 0.0000  |
| 9 | 1 | 8 | 8 | 0 | 8 | 6056.3759 | 0.0002  |
| 9 | 1 | 8 | 8 | 1 | 7 | 5082.0119 | 0.0002  |
| 9 | 1 | 8 | 8 | 2 | 7 | 4650.0330 | -0.0026 |
| 9 | 1 | 8 | 8 | 2 | 6 | 4334.2332 | 0.0004  |
| 9 | 2 | 8 | 8 | 1 | 7 | 5432.6671 | 0.0031  |
| 9 | 2 | 8 | 8 | 1 | 8 | 6359.6050 | -0.0083 |
| 9 | 2 | 8 | 8 | 2 | 7 | 5000.6882 | 0.0003  |
| 9 | 2 | 7 | 8 | 1 | 7 | 5888.5187 | 0.0000  |
| 9 | 2 | 7 | 8 | 2 | 6 | 5140.7399 | 0.0001  |
| 9 | 2 | 7 | 8 | 3 | 6 | 3937.3253 | -0.0032 |
| 9 | 3 | 7 | 8 | 2 | 6 | 6252.3495 | -0.0072 |
| 9 | 3 | 7 | 8 | 2 | 7 | 6568.1595 | 0.0001  |
| 9 | 3 | 7 | 8 | 3 | 6 | 5048.9457 | 0.0002  |
| 9 | 3 | 6 | 8 | 2 | 6 | 6322.0750 | -0.0073 |
| 9 | 3 | 6 | 8 | 4 | 5 | 3132.0343 | 0.0022  |
| 9 | 3 | 6 | 8 | 2 | 7 | 6637.8850 | 0.0000  |
| 9 | 3 | 6 | 8 | 3 | 5 | 5082.5499 | 0.0001  |
| 9 | 4 | 6 | 8 | 4 | 5 | 5050.7700 | 0.0002  |
| 9 | 4 | 5 | 8 | 4 | 4 | 5053.0799 | 0.0001  |
| 9 | 5 | 5 | 9 | 4 | 6 | 2549.0764 | -0.0003 |
| 9 | 5 | 5 | 8 | 5 | 4 | 5046.0729 | 0.0001  |
| 9 | 5 | 4 | 8 | 5 | 3 | 5046.1433 | 0.0001  |
| 9 | 5 | 4 | 9 | 4 | 5 | 2545.3939 | -0.0008 |

---

|    |   |    |    |   |   |           |         |
|----|---|----|----|---|---|-----------|---------|
| 9  | 6 | 4  | 9  | 5 | 5 | 3124.6211 | 0.0000  |
| 9  | 6 | 4  | 9  | 5 | 4 | 3124.5224 | 0.0000  |
| 9  | 6 | 4  | 8  | 6 | 3 | 5043.1480 | 0.0001  |
| 9  | 6 | 3  | 9  | 5 | 5 | 3124.6225 | 0.0000  |
| 9  | 6 | 3  | 9  | 5 | 4 | 3124.5238 | 0.0000  |
| 9  | 6 | 3  | 8  | 6 | 2 | 5043.1491 | 0.0001  |
| 9  | 7 | 3  | 9  | 6 | 4 | 3697.5411 | 0.0013  |
| 9  | 7 | 3  | 9  | 6 | 3 | 3697.5386 | 0.0002  |
| 9  | 7 | 3  | 8  | 7 | 2 | 5041.4428 | 0.0000  |
| 9  | 7 | 2  | 9  | 6 | 3 | 3697.5397 | 0.0013  |
| 9  | 7 | 2  | 9  | 6 | 4 | 3697.5400 | 0.0002  |
| 9  | 7 | 2  | 8  | 7 | 1 | 5041.4428 | 0.0000  |
| 9  | 8 | 2  | 8  | 8 | 1 | 5040.3869 | 0.0000  |
| 9  | 8 | 2  | 9  | 7 | 2 | 4268.7988 | 0.0001  |
| 9  | 8 | 2  | 9  | 7 | 3 | 4268.7984 | -0.0003 |
| 9  | 8 | 1  | 9  | 7 | 3 | 4268.7988 | 0.0001  |
| 9  | 8 | 1  | 9  | 7 | 2 | 4268.7975 | -0.0012 |
| 9  | 8 | 1  | 8  | 8 | 0 | 5040.3869 | 0.0000  |
| 9  | 9 | 1  | 9  | 8 | 2 | 4839.2471 | 0.0017  |
| 9  | 9 | 0  | 9  | 8 | 1 | 4839.2471 | 0.0017  |
| 10 | 0 | 10 | 9  | 1 | 8 | 4256.0146 | -0.0009 |
| 10 | 0 | 10 | 9  | 1 | 9 | 5389.9916 | 0.0009  |
| 10 | 0 | 10 | 9  | 0 | 9 | 5421.1693 | 0.0000  |
| 10 | 1 | 10 | 9  | 0 | 9 | 5441.1949 | 0.0045  |
| 10 | 1 | 10 | 9  | 1 | 9 | 5410.0119 | 0.0001  |
| 10 | 1 | 9  | 9  | 2 | 8 | 5273.0776 | 0.0021  |
| 10 | 1 | 9  | 9  | 1 | 8 | 5623.7281 | 0.0004  |
| 10 | 1 | 9  | 9  | 2 | 7 | 4817.2214 | 0.0007  |
| 10 | 2 | 9  | 9  | 2 | 8 | 5547.2604 | 0.0027  |
| 10 | 2 | 9  | 9  | 1 | 8 | 5897.8980 | -0.0120 |
| 10 | 2 | 8  | 9  | 3 | 7 | 4602.3346 | -0.0016 |
| 10 | 2 | 8  | 9  | 1 | 8 | 6520.4540 | -0.0060 |
| 10 | 2 | 8  | 9  | 2 | 7 | 5713.9533 | 0.0003  |
| 10 | 3 | 8  | 9  | 3 | 7 | 5608.9701 | 0.0004  |
| 10 | 3 | 7  | 9  | 2 | 7 | 6843.8114 | 0.0000  |
| 10 | 3 | 7  | 9  | 3 | 6 | 5662.4691 | 0.0002  |
| 10 | 3 | 7  | 9  | 4 | 6 | 3743.7315 | 0.0002  |
| 10 | 4 | 7  | 9  | 4 | 6 | 5614.8631 | 0.0003  |
| 10 | 4 | 6  | 9  | 4 | 5 | 5619.7656 | 0.0002  |
| 10 | 5 | 6  | 10 | 4 | 7 | 2543.3300 | 0.0112  |
| 10 | 5 | 6  | 9  | 5 | 5 | 5609.1053 | 0.0003  |
| 10 | 5 | 5  | 9  | 5 | 4 | 5609.3005 | 0.0003  |
| 10 | 5 | 5  | 10 | 4 | 6 | 2534.9298 | 0.0002  |
| 10 | 6 | 5  | 10 | 5 | 6 | 3120.6256 | 0.0037  |
| 10 | 6 | 5  | 9  | 6 | 4 | 5605.1060 | 0.0003  |
| 10 | 6 | 4  | 9  | 6 | 3 | 5605.1102 | 0.0003  |
| 10 | 6 | 4  | 10 | 5 | 5 | 3120.3420 | 0.0085  |
| 10 | 7 | 4  | 10 | 6 | 4 | 3695.1743 | 0.0002  |
| 10 | 7 | 4  | 10 | 6 | 5 | 3695.1794 | -0.0003 |
| 10 | 7 | 3  | 10 | 6 | 5 | 3695.1800 | 0.0002  |
| 10 | 7 | 3  | 10 | 6 | 4 | 3695.1715 | -0.0027 |
| 10 | 7 | 3  | 9  | 7 | 2 | 5602.7460 | 0.0003  |
| 10 | 8 | 3  | 9  | 8 | 2 | 5601.2756 | 0.0003  |
| 10 | 8 | 3  | 10 | 7 | 3 | 4267.3284 | 0.0001  |
| 10 | 8 | 3  | 10 | 7 | 4 | 4267.3250 | -0.0034 |

|    |    |    |    |    |    |           |         |
|----|----|----|----|----|----|-----------|---------|
| 10 | 8  | 2  | 10 | 7  | 4  | 4267.3285 | 0.0001  |
| 10 | 8  | 2  | 10 | 7  | 3  | 4267.3250 | -0.0033 |
| 10 | 8  | 2  | 9  | 8  | 1  | 5601.2756 | 0.0003  |
| 10 | 9  | 2  | 10 | 8  | 3  | 4838.2855 | -0.0016 |
| 10 | 9  | 1  | 10 | 8  | 2  | 4838.2855 | -0.0016 |
| 10 | 10 | 0  | 10 | 9  | 1  | 5408.6022 | 0.0001  |
| 10 | 10 | 1  | 10 | 9  | 2  | 5408.6022 | 0.0001  |
| 11 | 0  | 11 | 10 | 1  | 10 | 5931.6067 | 0.0022  |
| 11 | 0  | 11 | 10 | 0  | 10 | 5951.6265 | 0.0009  |
| 11 | 1  | 11 | 10 | 0  | 10 | 5964.2456 | 0.0025  |
| 11 | 1  | 11 | 10 | 1  | 10 | 5944.2140 | -0.0079 |
| 11 | 1  | 10 | 10 | 2  | 9  | 5885.0318 | 0.0018  |
| 11 | 1  | 10 | 10 | 1  | 9  | 6159.2090 | -0.0033 |
| 11 | 2  | 10 | 10 | 2  | 9  | 6091.4832 | -0.0078 |
| 11 | 2  | 10 | 10 | 1  | 9  | 6365.6735 | 0.0002  |
| 11 | 2  | 9  | 10 | 3  | 8  | 5275.6130 | -0.0038 |
| 11 | 2  | 9  | 10 | 2  | 8  | 6282.2509 | 0.0004  |
| 11 | 3  | 9  | 10 | 3  | 8  | 6167.4473 | 0.0013  |
| 11 | 3  | 8  | 10 | 3  | 7  | 6246.0800 | -0.0021 |
| 11 | 4  | 8  | 10 | 4  | 7  | 6179.3445 | 0.0010  |
| 11 | 4  | 8  | 11 | 3  | 9  | 2006.2539 | 0.0000  |
| 11 | 4  | 7  | 10 | 4  | 6  | 6188.8800 | 0.0089  |
| 11 | 5  | 7  | 10 | 5  | 6  | 6172.8442 | 0.0010  |
| 11 | 5  | 6  | 10 | 5  | 5  | 6173.3267 | 0.0009  |
| 11 | 6  | 6  | 10 | 6  | 5  | 6167.5758 | 0.0010  |
| 11 | 6  | 6  | 11 | 5  | 7  | 3115.3528 | -0.0006 |
| 11 | 6  | 6  | 11 | 5  | 6  | 3114.5770 | 0.0000  |
| 11 | 6  | 5  | 11 | 5  | 6  | 3114.5958 | 0.0000  |
| 11 | 6  | 5  | 11 | 5  | 7  | 3115.3723 | 0.0000  |
| 11 | 6  | 5  | 10 | 6  | 4  | 6167.5890 | 0.0010  |
| 11 | 7  | 5  | 11 | 6  | 6  | 3692.0179 | 0.0021  |
| 11 | 7  | 5  | 10 | 7  | 4  | 6164.4119 | 0.0009  |
| 11 | 7  | 5  | 11 | 6  | 5  | 3691.9972 | 0.0002  |
| 11 | 7  | 4  | 10 | 7  | 3  | 6164.4121 | 0.0009  |
| 11 | 7  | 4  | 11 | 6  | 6  | 3692.0163 | 0.0002  |
| 11 | 7  | 4  | 11 | 6  | 5  | 3692.0062 | 0.0090  |
| 11 | 8  | 4  | 11 | 7  | 4  | 4265.3484 | 0.0001  |
| 11 | 8  | 4  | 11 | 7  | 5  | 4265.3487 | 0.0002  |
| 11 | 8  | 3  | 11 | 7  | 4  | 4265.3480 | -0.0003 |
| 11 | 8  | 3  | 11 | 7  | 5  | 4265.3486 | 0.0001  |
| 11 | 9  | 3  | 11 | 8  | 4  | 4836.9892 | 0.0015  |
| 11 | 9  | 2  | 11 | 8  | 3  | 4836.9892 | 0.0015  |
| 11 | 10 | 2  | 10 | 10 | 1  | 6160.2541 | 0.0007  |
| 11 | 10 | 2  | 11 | 9  | 3  | 5407.7200 | -0.0038 |
| 11 | 10 | 1  | 11 | 9  | 2  | 5407.7200 | -0.0038 |
| 11 | 10 | 1  | 10 | 10 | 0  | 6160.2541 | 0.0007  |
| 12 | 0  | 12 | 11 | 1  | 11 | 6469.9872 | -0.0028 |
| 12 | 1  | 12 | 11 | 0  | 11 | 6490.4324 | -0.0078 |
| 12 | 1  | 11 | 11 | 2  | 10 | 6483.4563 | -0.0015 |
| 12 | 1  | 11 | 11 | 1  | 10 | 6689.9100 | -0.0088 |
| 12 | 2  | 11 | 11 | 1  | 10 | 6839.9389 | 0.0000  |
| 12 | 2  | 11 | 11 | 2  | 10 | 6633.5000 | 0.0220  |
| 12 | 2  | 10 | 11 | 3  | 9  | 5952.8723 | -0.0016 |
| 12 | 2  | 10 | 11 | 2  | 9  | 6844.7031 | 0.0000  |
| 12 | 3  | 10 | 11 | 4  | 7  | 4699.5137 | 0.0007  |

|    |    |    |    |   |    |           |         |
|----|----|----|----|---|----|-----------|---------|
| 12 | 3  | 9  | 12 | 2 | 11 | 2105.1116 | -0.0005 |
| 12 | 3  | 9  | 11 | 4 | 8  | 5027.1980 | 0.0004  |
| 12 | 5  | 8  | 12 | 4 | 9  | 2530.2038 | 0.0001  |
| 12 | 8  | 5  | 12 | 7 | 6  | 4262.7516 | -0.0021 |
| 12 | 8  | 5  | 12 | 7 | 5  | 4262.7528 | 0.0001  |
| 12 | 8  | 4  | 12 | 7 | 5  | 4262.7502 | -0.0025 |
| 12 | 8  | 4  | 12 | 7 | 6  | 4262.7538 | 0.0001  |
| 12 | 9  | 4  | 12 | 8 | 5  | 4835.2814 | 0.0051  |
| 12 | 9  | 3  | 12 | 8 | 4  | 4835.2814 | 0.0051  |
| 12 | 10 | 3  | 12 | 9 | 4  | 5406.5523 | -0.0052 |
| 12 | 10 | 2  | 12 | 9 | 3  | 5406.5523 | -0.0052 |
| 13 | 2  | 11 | 12 | 3 | 10 | 6629.3576 | 0.0003  |
| 13 | 4  | 10 | 13 | 3 | 11 | 2056.1990 | -0.0001 |
| 13 | 4  | 9  | 12 | 5 | 8  | 4842.3750 | 0.0004  |
| 13 | 5  | 9  | 13 | 4 | 10 | 2524.4596 | 0.0000  |
| 13 | 6  | 8  | 13 | 5 | 9  | 3100.4095 | 0.0000  |
| 13 | 6  | 7  | 13 | 5 | 8  | 3096.4366 | 0.0000  |
| 13 | 7  | 7  | 13 | 6 | 7  | 3682.4600 | 0.0000  |
| 13 | 7  | 7  | 13 | 6 | 8  | 3682.6111 | 0.0000  |
| 13 | 7  | 6  | 13 | 6 | 8  | 3682.6145 | 0.0000  |
| 13 | 7  | 6  | 13 | 6 | 7  | 3682.4635 | 0.0000  |
| 13 | 8  | 6  | 13 | 7 | 6  | 4259.4241 | 0.0001  |
| 13 | 8  | 6  | 13 | 7 | 7  | 4259.4252 | -0.0023 |
| 13 | 8  | 5  | 13 | 7 | 6  | 4259.4252 | 0.0012  |
| 13 | 8  | 5  | 13 | 7 | 7  | 4259.4277 | 0.0001  |
| 13 | 9  | 5  | 13 | 8 | 6  | 4833.0700 | -0.0052 |
| 13 | 9  | 4  | 13 | 8 | 5  | 4833.0700 | -0.0052 |
| 13 | 10 | 4  | 13 | 9 | 5  | 5405.0499 | 0.0015  |
| 13 | 10 | 3  | 13 | 9 | 4  | 5405.0499 | 0.0015  |
| 14 | 7  | 8  | 14 | 6 | 9  | 3676.0121 | 0.0000  |
| 14 | 7  | 8  | 14 | 6 | 8  | 3675.6385 | 0.0000  |
| 14 | 7  | 7  | 14 | 6 | 9  | 3676.0225 | 0.0000  |
| 14 | 7  | 7  | 14 | 6 | 8  | 3675.6489 | 0.0000  |
| 14 | 8  | 7  | 14 | 7 | 8  | 4255.2398 | -0.0022 |
| 14 | 8  | 6  | 14 | 7 | 7  | 4255.2296 | -0.0022 |
| 14 | 9  | 6  | 14 | 8 | 7  | 4830.2996 | 0.0003  |
| 14 | 9  | 5  | 14 | 8 | 6  | 4830.2994 | 0.0003  |
| 14 | 10 | 5  | 14 | 9 | 6  | 5403.1380 | 0.0010  |
| 14 | 10 | 4  | 14 | 9 | 5  | 5403.1380 | 0.0010  |
| 15 | 5  | 10 | 15 | 4 | 11 | 2359.4290 | -0.0012 |
| 15 | 8  | 8  | 15 | 7 | 9  | 4250.0568 | -0.0010 |
| 15 | 8  | 7  | 15 | 7 | 8  | 4250.0291 | -0.0009 |
| 15 | 9  | 7  | 15 | 8 | 8  | 4826.8600 | 0.0043  |
| 15 | 9  | 6  | 15 | 8 | 7  | 4826.8600 | 0.0050  |
| 16 | 9  | 8  | 16 | 8 | 9  | 4822.6418 | -0.0015 |
| 16 | 9  | 7  | 16 | 8 | 8  | 4822.6399 | -0.0015 |

**Table S7.** Experimental transition frequencies of the observed parent species of conformer **II** of the TFB dimer.

| $J'$ | $Ka'$ | $Kc'$ | $J''$ | $Ka''$ | $Kc''$ | $\nu_{\text{obs}}/\text{MHz}$ | $\Delta\nu_{\text{obs-calc}}/\text{MHz}$ |
|------|-------|-------|-------|--------|--------|-------------------------------|------------------------------------------|
| 3    | 2     | 2     | 2     | 1      | 2      | 2445.3443                     | 0.0077                                   |
| 3    | 2     | 2     | 2     | 1      | 1      | 2313.6408                     | -0.0001                                  |
| 3    | 2     | 1     | 2     | 1      | 1      | 2337.7162                     | -0.0002                                  |
| 3    | 2     | 1     | 2     | 1      | 2      | 2469.4256                     | 0.0134                                   |
| 3    | 3     | 1     | 2     | 2      | 1      | 2970.6498                     | -0.0015                                  |
| 3    | 3     | 1     | 2     | 2      | 0      | 2965.7579                     | 0.0000                                   |
| 3    | 3     | 0     | 2     | 2      | 1      | 2970.9945                     | -0.0003                                  |
| 3    | 3     | 0     | 2     | 2      | 0      | 2966.0999                     | -0.0015                                  |
| 4    | 1     | 4     | 3     | 0      | 3      | 2083.0939                     | 0.0040                                   |
| 4    | 1     | 3     | 3     | 0      | 3      | 2519.6774                     | 0.0006                                   |
| 4    | 1     | 3     | 3     | 1      | 2      | 2073.0215                     | 0.0002                                   |
| 4    | 2     | 3     | 3     | 1      | 2      | 2746.2536                     | 0.0027                                   |
| 4    | 2     | 3     | 3     | 1      | 3      | 3009.3000                     | 0.0041                                   |
| 4    | 2     | 2     | 3     | 1      | 3      | 3079.0154                     | 0.0035                                   |
| 4    | 2     | 2     | 3     | 1      | 2      | 2815.9558                     | -0.0111                                  |
| 4    | 3     | 2     | 3     | 2      | 1      | 3454.4463                     | 0.0022                                   |
| 4    | 3     | 2     | 3     | 2      | 2      | 3478.5232                     | 0.0035                                   |
| 4    | 3     | 1     | 3     | 2      | 2      | 3480.9015                     | -0.0054                                  |
| 4    | 3     | 1     | 3     | 2      | 1      | 3456.8370                     | 0.0057                                   |
| 4    | 4     | 1     | 4     | 3      | 2      | 2050.9742                     | -0.0004                                  |
| 4    | 4     | 1     | 3     | 3      | 1      | 4055.9419                     | 0.0050                                   |
| 4    | 4     | 1     | 3     | 3      | 0      | 4055.5946                     | 0.0012                                   |
| 4    | 4     | 1     | 4     | 3      | 1      | 2048.5870                     | -0.0004                                  |
| 4    | 4     | 0     | 3     | 3      | 1      | 4055.9579                     | 0.0011                                   |
| 4    | 4     | 0     | 3     | 3      | 0      | 4055.6114                     | -0.0020                                  |
| 4    | 4     | 0     | 4     | 3      | 2      | 2050.9942                     | -0.0004                                  |
| 4    | 4     | 0     | 4     | 3      | 1      | 2048.6070                     | -0.0004                                  |
| 5    | 0     | 5     | 4     | 1      | 4      | 2278.8502                     | 0.0008                                   |
| 5    | 1     | 5     | 4     | 0      | 4      | 2499.9002                     | 0.0000                                   |
| 5    | 1     | 4     | 4     | 0      | 4      | 3148.9410                     | 0.0078                                   |
| 5    | 1     | 4     | 4     | 1      | 3      | 2579.7056                     | 0.0002                                   |
| 5    | 2     | 4     | 4     | 1      | 4      | 3594.0905                     | 0.0053                                   |
| 5    | 2     | 4     | 4     | 1      | 3      | 3157.4980                     | -0.0004                                  |
| 5    | 2     | 4     | 4     | 2      | 3      | 2484.2690                     | 0.0001                                   |
| 5    | 2     | 3     | 4     | 1      | 3      | 3310.6821                     | -0.0046                                  |
| 5    | 2     | 3     | 4     | 2      | 2      | 2567.7350                     | -0.0061                                  |
| 5    | 2     | 3     | 4     | 1      | 4      | 3747.2522                     | -0.0213                                  |
| 5    | 3     | 3     | 4     | 2      | 3      | 3994.8746                     | -0.0010                                  |
| 5    | 3     | 3     | 4     | 2      | 2      | 3925.1561                     | -0.0034                                  |
| 5    | 3     | 3     | 4     | 0      | 4      | 5237.3326                     | -0.0003                                  |
| 5    | 3     | 2     | 4     | 2      | 2      | 3934.5750                     | 0.0011                                   |
| 5    | 3     | 2     | 4     | 2      | 3      | 4004.2885                     | -0.0015                                  |
| 5    | 4     | 2     | 4     | 3      | 2      | 4556.9867                     | -0.0013                                  |
| 5    | 4     | 2     | 5     | 3      | 3      | 2048.3332                     | -0.0004                                  |
| 5    | 4     | 2     | 4     | 3      | 1      | 4554.5943                     | -0.0064                                  |
| 5    | 4     | 1     | 4     | 3      | 1      | 4554.7783                     | -0.0014                                  |
| 5    | 4     | 1     | 4     | 3      | 2      | 4557.1635                     | -0.0034                                  |
| 5    | 4     | 1     | 5     | 3      | 3      | 2048.5121                     | -0.0004                                  |
| 5    | 5     | 1     | 5     | 4      | 1      | 2636.8905                     | 0.0000                                   |
| 5    | 5     | 1     | 4     | 4      | 1      | 5143.0821                     | -0.0007                                  |
| 5    | 5     | 1     | 4     | 4      | 0      | 5143.0633                     | 0.0005                                   |
| 5    | 5     | 0     | 4     | 4      | 1      | 5143.0857                     | 0.0019                                   |

|   |   |   |   |   |   |           |         |
|---|---|---|---|---|---|-----------|---------|
| 5 | 5 | 0 | 4 | 4 | 0 | 5143.0629 | -0.0009 |
| 5 | 5 | 0 | 5 | 4 | 2 | 2637.0704 | 0.0000  |
| 6 | 0 | 6 | 5 | 1 | 5 | 2776.6929 | 0.0036  |
| 6 | 1 | 6 | 5 | 0 | 5 | 2920.1819 | 0.0006  |
| 6 | 1 | 5 | 5 | 2 | 3 | 2346.0152 | 0.0005  |
| 6 | 1 | 5 | 5 | 0 | 5 | 3814.4492 | 0.0103  |
| 6 | 1 | 5 | 5 | 2 | 4 | 2499.2069 | 0.0039  |
| 6 | 2 | 5 | 5 | 1 | 4 | 3550.1040 | 0.0027  |
| 6 | 2 | 5 | 5 | 1 | 5 | 4199.1370 | 0.0026  |
| 6 | 2 | 4 | 5 | 1 | 5 | 4480.6460 | 0.0074  |
| 6 | 2 | 4 | 5 | 1 | 4 | 3831.6110 | 0.0054  |
| 6 | 2 | 4 | 5 | 2 | 3 | 3100.6247 | 0.0004  |
| 6 | 3 | 4 | 5 | 2 | 3 | 4369.9415 | -0.0002 |
| 6 | 3 | 4 | 5 | 2 | 4 | 4523.1295 | -0.0005 |
| 6 | 3 | 4 | 5 | 3 | 3 | 3012.5271 | 0.0038  |
| 6 | 3 | 3 | 5 | 2 | 4 | 4550.6669 | -0.0010 |
| 6 | 3 | 3 | 5 | 3 | 2 | 3030.6530 | 0.0062  |
| 6 | 3 | 3 | 5 | 2 | 3 | 4397.4755 | -0.0041 |
| 6 | 4 | 3 | 5 | 3 | 2 | 5049.4906 | -0.0032 |
| 6 | 4 | 3 | 5 | 3 | 3 | 5058.9073 | -0.0009 |
| 6 | 4 | 3 | 6 | 3 | 4 | 2046.3844 | -0.0004 |
| 6 | 4 | 2 | 5 | 3 | 2 | 5050.3789 | -0.0020 |
| 6 | 4 | 2 | 6 | 3 | 4 | 2047.2750 | 0.0030  |
| 6 | 4 | 2 | 5 | 3 | 3 | 5059.7921 | -0.0032 |
| 6 | 4 | 2 | 6 | 3 | 3 | 2019.7335 | -0.0006 |
| 6 | 5 | 2 | 5 | 4 | 1 | 5643.3769 | 0.0079  |
| 6 | 5 | 2 | 6 | 4 | 3 | 2632.9733 | -0.0001 |
| 6 | 5 | 2 | 5 | 4 | 2 | 5643.5500 | 0.0021  |
| 6 | 5 | 1 | 5 | 4 | 2 | 5643.5673 | 0.0079  |
| 6 | 5 | 1 | 5 | 4 | 1 | 5643.3769 | -0.0036 |
| 6 | 5 | 1 | 6 | 4 | 2 | 2632.0860 | -0.0117 |
| 6 | 6 | 1 | 5 | 5 | 1 | 6230.3310 | -0.0017 |
| 6 | 6 | 1 | 5 | 5 | 0 | 6230.3310 | -0.0006 |
| 6 | 6 | 1 | 6 | 5 | 2 | 3223.8544 | 0.0003  |
| 6 | 6 | 1 | 6 | 5 | 1 | 3223.8448 | 0.0022  |
| 6 | 6 | 0 | 5 | 5 | 1 | 6230.3310 | -0.0017 |
| 6 | 6 | 0 | 5 | 5 | 0 | 6230.3310 | -0.0007 |
| 6 | 6 | 0 | 6 | 5 | 2 | 3223.8544 | 0.0002  |
| 6 | 6 | 0 | 6 | 5 | 1 | 3223.8448 | 0.0021  |
| 7 | 0 | 7 | 6 | 1 | 6 | 3260.8634 | 0.0041  |
| 7 | 1 | 7 | 6 | 0 | 6 | 3348.5217 | 0.0026  |
| 7 | 1 | 7 | 6 | 1 | 6 | 3293.4368 | -0.0001 |
| 7 | 1 | 6 | 6 | 0 | 6 | 4511.4600 | 0.0003  |
| 7 | 1 | 6 | 6 | 2 | 4 | 2807.5104 | 0.0001  |
| 7 | 1 | 6 | 6 | 1 | 5 | 3562.1200 | 0.0001  |
| 7 | 1 | 6 | 6 | 2 | 5 | 3089.0185 | 0.0039  |
| 7 | 2 | 6 | 6 | 1 | 6 | 4823.2424 | 0.0099  |
| 7 | 2 | 6 | 6 | 1 | 5 | 3928.9753 | 0.0004  |
| 7 | 2 | 5 | 6 | 3 | 4 | 2361.4017 | 0.0015  |
| 7 | 2 | 5 | 6 | 1 | 5 | 4385.3263 | -0.0010 |
| 7 | 2 | 5 | 6 | 3 | 3 | 2333.8630 | 0.0006  |
| 7 | 2 | 5 | 6 | 2 | 4 | 3630.7178 | 0.0001  |
| 7 | 2 | 5 | 6 | 1 | 6 | 5279.5856 | 0.0007  |
| 7 | 3 | 5 | 6 | 2 | 4 | 4784.8521 | -0.0015 |
| 7 | 3 | 5 | 6 | 2 | 5 | 5066.3650 | 0.0071  |

|   |   |   |   |   |   |           |         |
|---|---|---|---|---|---|-----------|---------|
| 7 | 3 | 5 | 6 | 3 | 4 | 3515.5361 | -0.0001 |
| 7 | 3 | 4 | 6 | 3 | 3 | 3554.0324 | 0.0000  |
| 7 | 3 | 4 | 6 | 2 | 5 | 5132.4006 | 0.0087  |
| 7 | 3 | 4 | 6 | 2 | 4 | 4850.8883 | 0.0006  |
| 7 | 4 | 4 | 7 | 3 | 5 | 2047.4810 | -0.0055 |
| 7 | 4 | 4 | 6 | 4 | 3 | 3516.6425 | 0.0047  |
| 7 | 4 | 4 | 6 | 3 | 3 | 5535.4794 | -0.0054 |
| 7 | 4 | 4 | 6 | 3 | 4 | 5563.0226 | -0.0001 |
| 7 | 4 | 3 | 6 | 3 | 4 | 5566.2302 | -0.0024 |
| 7 | 4 | 3 | 6 | 4 | 2 | 3518.9639 | 0.0033  |
| 7 | 4 | 3 | 7 | 3 | 5 | 2050.6961 | -0.0003 |
| 7 | 4 | 3 | 6 | 3 | 3 | 5538.6987 | 0.0040  |
| 7 | 5 | 3 | 6 | 4 | 2 | 6142.7132 | -0.0009 |
| 7 | 5 | 3 | 6 | 4 | 3 | 6143.6014 | 0.0003  |
| 7 | 5 | 3 | 7 | 4 | 4 | 2626.9581 | -0.0053 |
| 7 | 5 | 2 | 6 | 4 | 3 | 6143.6713 | 0.0015  |
| 7 | 5 | 2 | 6 | 4 | 2 | 6142.7829 | 0.0003  |
| 7 | 6 | 2 | 7 | 5 | 3 | 3220.2127 | 0.0009  |
| 7 | 6 | 2 | 6 | 5 | 1 | 6730.8366 | 0.0085  |
| 7 | 6 | 1 | 6 | 5 | 2 | 6730.8565 | 0.0162  |
| 7 | 6 | 1 | 7 | 5 | 2 | 3220.1447 | 0.0009  |
| 7 | 7 | 1 | 7 | 6 | 1 | 3810.5765 | 0.0010  |
| 7 | 7 | 1 | 7 | 6 | 2 | 3810.5772 | 0.0010  |
| 7 | 7 | 0 | 7 | 6 | 2 | 3810.5772 | 0.0010  |
| 7 | 7 | 0 | 7 | 6 | 1 | 3810.5765 | 0.0010  |
| 8 | 0 | 8 | 7 | 0 | 7 | 3766.8917 | 0.0000  |
| 8 | 0 | 8 | 7 | 1 | 7 | 3734.3155 | 0.0015  |
| 8 | 1 | 8 | 7 | 2 | 6 | 2223.0550 | -0.0006 |
| 8 | 1 | 8 | 7 | 1 | 7 | 3752.8509 | -0.0001 |
| 8 | 1 | 8 | 7 | 0 | 7 | 3785.4304 | 0.0017  |
| 8 | 1 | 7 | 7 | 2 | 5 | 3210.2695 | -0.0015 |
| 8 | 1 | 7 | 7 | 2 | 6 | 3666.6255 | 0.0021  |
| 8 | 1 | 7 | 7 | 0 | 7 | 5228.9979 | 0.0014  |
| 8 | 1 | 7 | 7 | 1 | 6 | 4033.4784 | 0.0001  |
| 8 | 2 | 7 | 7 | 3 | 4 | 2258.1101 | 0.0005  |
| 8 | 2 | 7 | 7 | 1 | 6 | 4301.4790 | -0.0080 |
| 8 | 2 | 7 | 7 | 1 | 7 | 5464.4310 | 0.0035  |
| 8 | 2 | 6 | 7 | 3 | 4 | 2933.4286 | 0.0013  |
| 8 | 2 | 6 | 7 | 3 | 5 | 2999.4630 | 0.0017  |
| 8 | 2 | 6 | 7 | 1 | 7 | 6139.7400 | -0.0051 |
| 8 | 2 | 6 | 7 | 1 | 6 | 4976.8020 | -0.0026 |
| 8 | 2 | 6 | 7 | 2 | 5 | 4153.5978 | 0.0006  |
| 8 | 3 | 6 | 7 | 2 | 5 | 5170.6269 | -0.0113 |
| 8 | 3 | 6 | 7 | 3 | 5 | 4016.5022 | 0.0000  |
| 8 | 3 | 6 | 7 | 2 | 6 | 5626.9927 | 0.0022  |
| 8 | 3 | 5 | 7 | 4 | 4 | 2105.3042 | 0.0006  |
| 8 | 3 | 5 | 7 | 2 | 6 | 5763.2757 | -0.0027 |
| 8 | 3 | 5 | 7 | 2 | 5 | 5306.9250 | -0.0011 |
| 8 | 4 | 5 | 7 | 3 | 5 | 6071.5143 | 0.0031  |
| 8 | 4 | 5 | 8 | 3 | 6 | 2055.0085 | -0.0005 |
| 8 | 4 | 5 | 7 | 4 | 4 | 4024.0247 | 0.0000  |
| 8 | 4 | 5 | 7 | 3 | 4 | 6005.4760 | -0.0011 |
| 8 | 4 | 4 | 8 | 3 | 6 | 2064.4461 | -0.0003 |
| 8 | 4 | 4 | 7 | 3 | 5 | 6080.9465 | -0.0021 |
| 8 | 4 | 4 | 7 | 3 | 4 | 6014.9141 | -0.0005 |

|   |   |   |   |   |   |           |         |
|---|---|---|---|---|---|-----------|---------|
| 8 | 4 | 4 | 7 | 4 | 3 | 4030.2522 | 0.0000  |
| 8 | 5 | 4 | 8 | 4 | 4 | 2609.6682 | -0.0004 |
| 8 | 5 | 4 | 7 | 4 | 4 | 6643.1302 | -0.0006 |
| 8 | 5 | 4 | 7 | 4 | 3 | 6639.9232 | 0.0023  |
| 8 | 5 | 4 | 8 | 4 | 5 | 2619.1000 | -0.0061 |
| 8 | 5 | 3 | 7 | 4 | 3 | 6640.2188 | 0.0034  |
| 8 | 5 | 3 | 7 | 4 | 4 | 6643.4250 | -0.0003 |
| 8 | 5 | 3 | 8 | 4 | 4 | 2609.9628 | -0.0004 |
| 8 | 6 | 3 | 8 | 5 | 4 | 3214.8010 | -0.0029 |
| 8 | 6 | 3 | 8 | 5 | 3 | 3214.5104 | 0.0010  |
| 8 | 6 | 2 | 8 | 5 | 3 | 3214.5147 | 0.0006  |
| 8 | 6 | 2 | 8 | 5 | 4 | 3214.8060 | -0.0026 |
| 8 | 7 | 2 | 8 | 6 | 2 | 3807.3500 | -0.0048 |
| 8 | 7 | 2 | 8 | 6 | 3 | 3807.3599 | 0.0004  |
| 8 | 7 | 1 | 8 | 6 | 2 | 3807.3500 | -0.0049 |
| 8 | 7 | 1 | 8 | 6 | 3 | 3807.3599 | 0.0003  |
| 8 | 8 | 1 | 8 | 7 | 2 | 4397.2130 | -0.0055 |
| 8 | 8 | 1 | 8 | 7 | 1 | 4397.2130 | -0.0055 |
| 8 | 8 | 0 | 8 | 7 | 1 | 4397.2130 | -0.0055 |
| 8 | 8 | 0 | 8 | 7 | 2 | 4397.2130 | -0.0055 |
| 9 | 0 | 9 | 8 | 0 | 8 | 4218.9179 | -0.0001 |
| 9 | 0 | 9 | 8 | 1 | 8 | 4200.3870 | 0.0061  |
| 9 | 1 | 9 | 8 | 1 | 8 | 4210.6292 | -0.0001 |
| 9 | 1 | 9 | 8 | 0 | 8 | 4229.1689 | 0.0026  |
| 9 | 1 | 8 | 8 | 1 | 7 | 4492.1661 | -0.0001 |
| 9 | 1 | 8 | 8 | 2 | 7 | 4224.1503 | -0.0072 |
| 9 | 1 | 8 | 8 | 0 | 8 | 5954.2725 | 0.0015  |
| 9 | 1 | 8 | 8 | 2 | 6 | 3548.8398 | -0.0001 |
| 9 | 2 | 8 | 8 | 3 | 6 | 2716.2083 | 0.0003  |
| 9 | 2 | 8 | 8 | 3 | 5 | 2579.9205 | 0.0004  |
| 9 | 2 | 8 | 8 | 1 | 8 | 6120.1433 | 0.0004  |
| 9 | 2 | 8 | 8 | 1 | 7 | 4676.5761 | 0.0009  |
| 9 | 2 | 8 | 8 | 2 | 7 | 4408.5666 | 0.0000  |
| 9 | 2 | 7 | 8 | 1 | 7 | 5609.6150 | -0.0066 |
| 9 | 2 | 7 | 8 | 2 | 6 | 4666.2953 | 0.0000  |
| 9 | 2 | 7 | 8 | 3 | 6 | 3649.2529 | -0.0015 |
| 9 | 3 | 7 | 8 | 2 | 7 | 6206.6070 | -0.0018 |
| 9 | 3 | 7 | 8 | 3 | 6 | 4514.2503 | 0.0000  |
| 9 | 3 | 7 | 8 | 2 | 6 | 5531.2870 | -0.0042 |
| 9 | 3 | 7 | 8 | 4 | 4 | 2449.8047 | 0.0008  |
| 9 | 3 | 6 | 8 | 2 | 6 | 5780.2820 | -0.0067 |
| 9 | 3 | 6 | 8 | 4 | 4 | 2698.8020 | 0.0006  |
| 9 | 3 | 6 | 8 | 3 | 5 | 4626.9570 | -0.0029 |
| 9 | 3 | 6 | 8 | 2 | 7 | 6455.5970 | -0.0093 |
| 9 | 3 | 6 | 8 | 4 | 5 | 2708.2394 | 0.0006  |
| 9 | 4 | 6 | 9 | 3 | 7 | 2073.0219 | -0.0005 |
| 9 | 4 | 6 | 8 | 3 | 6 | 6587.2726 | -0.0001 |
| 9 | 4 | 6 | 8 | 3 | 5 | 6450.9788 | -0.0060 |
| 9 | 4 | 6 | 8 | 4 | 5 | 4532.2638 | 0.0001  |
| 9 | 4 | 5 | 9 | 3 | 7 | 2096.8415 | -0.0005 |
| 9 | 4 | 5 | 8 | 3 | 5 | 6474.8029 | -0.0014 |
| 9 | 4 | 5 | 8 | 4 | 4 | 4546.6459 | 0.0001  |
| 9 | 4 | 5 | 8 | 3 | 6 | 6611.0900 | -0.0022 |
| 9 | 5 | 5 | 9 | 4 | 5 | 2586.2578 | -0.0005 |
| 9 | 5 | 5 | 9 | 4 | 6 | 2610.0774 | -0.0004 |



|    |   |    |    |   |    |           |         |
|----|---|----|----|---|----|-----------|---------|
| 9  | 5 | 4  | 9  | 4 | 5  | 2587.2860 | 0.0100  |
| 9  | 5 | 4  | 9  | 4 | 6  | 2611.0990 | 0.0034  |
| 9  | 6 | 4  | 9  | 5 | 4  | 3206.2029 | 0.0005  |
| 9  | 6 | 4  | 9  | 5 | 5  | 3207.2246 | 0.0045  |
| 9  | 6 | 4  | 8  | 6 | 3  | 4515.6516 | 0.0000  |
| 9  | 6 | 3  | 9  | 5 | 4  | 3206.2285 | 0.0029  |
| 9  | 6 | 3  | 8  | 6 | 2  | 4515.6701 | 0.0000  |
| 9  | 6 | 3  | 9  | 5 | 5  | 3207.2438 | 0.0005  |
| 9  | 7 | 3  | 8  | 7 | 2  | 4511.0512 | 0.0000  |
| 9  | 7 | 3  | 9  | 6 | 4  | 3802.7581 | -0.0010 |
| 9  | 7 | 2  | 9  | 6 | 3  | 3802.7373 | 0.0011  |
| 9  | 7 | 2  | 8  | 7 | 1  | 4511.0515 | 0.0000  |
| 9  | 8 | 2  | 9  | 7 | 3  | 4394.3004 | 0.0015  |
| 9  | 8 | 2  | 9  | 7 | 2  | 4394.3001 | 0.0015  |
| 9  | 8 | 1  | 9  | 7 | 3  | 4394.3004 | 0.0015  |
| 9  | 8 | 1  | 9  | 7 | 2  | 4394.3001 | 0.0015  |
| 9  | 9 | 1  | 9  | 8 | 2  | 4983.7975 | 0.0000  |
| 9  | 9 | 0  | 9  | 8 | 1  | 4983.7975 | 0.0000  |
| 10 | 0 | 10 | 9  | 1 | 9  | 4661.7605 | 0.0010  |
| 10 | 0 | 10 | 9  | 0 | 9  | 4672.0160 | 0.0082  |
| 10 | 0 | 10 | 9  | 1 | 8  | 2936.6540 | -0.0007 |
| 10 | 1 | 10 | 9  | 0 | 9  | 4677.5480 | -0.0023 |
| 10 | 1 | 10 | 9  | 1 | 9  | 4667.3020 | -0.0001 |
| 10 | 1 | 9  | 9  | 2 | 8  | 4757.8176 | -0.0040 |
| 10 | 1 | 9  | 9  | 2 | 7  | 3824.7750 | -0.0002 |
| 10 | 1 | 9  | 9  | 0 | 9  | 6677.5837 | 0.0000  |
| 10 | 1 | 9  | 10 | 0 | 10 | 2005.5781 | 0.0022  |
| 10 | 2 | 9  | 9  | 1 | 9  | 6787.4709 | 0.0013  |
| 10 | 2 | 9  | 9  | 1 | 8  | 5062.3603 | -0.0046 |
| 10 | 2 | 9  | 9  | 2 | 8  | 4877.9500 | -0.0058 |
| 10 | 2 | 9  | 10 | 1 | 10 | 2120.1692 | 0.0016  |
| 10 | 2 | 8  | 9  | 1 | 8  | 6283.8864 | 0.0016  |
| 10 | 2 | 8  | 9  | 2 | 7  | 5166.4294 | 0.0000  |
| 10 | 3 | 8  | 9  | 3 | 7  | 5007.7736 | 0.0000  |
| 10 | 3 | 8  | 9  | 4 | 5  | 2910.9320 | 0.0003  |
| 10 | 3 | 8  | 9  | 2 | 8  | 6805.8166 | 0.0006  |
| 10 | 3 | 8  | 9  | 2 | 7  | 5872.7746 | 0.0051  |
| 10 | 3 | 7  | 9  | 2 | 7  | 6283.6797 | 0.0004  |
| 10 | 3 | 7  | 9  | 4 | 6  | 3345.6550 | -0.0060 |
| 10 | 4 | 7  | 9  | 3 | 6  | 6864.5945 | -0.0009 |
| 10 | 4 | 7  | 10 | 3 | 8  | 2105.8187 | -0.0005 |
| 10 | 4 | 7  | 10 | 1 | 10 | 6153.8483 | 0.0014  |
| 10 | 4 | 6  | 9  | 5 | 4  | 2482.7331 | 0.0005  |
| 10 | 4 | 6  | 9  | 3 | 6  | 6917.8528 | -0.0002 |
| 10 | 4 | 6  | 9  | 5 | 5  | 2483.7508 | 0.0005  |
| 10 | 4 | 6  | 10 | 3 | 8  | 2159.0730 | -0.0039 |
| 10 | 5 | 6  | 10 | 4 | 7  | 2601.4000 | 0.0041  |
| 10 | 5 | 5  | 10 | 4 | 6  | 2551.1300 | -0.0075 |
| 10 | 6 | 5  | 10 | 5 | 5  | 3194.1373 | -0.0003 |
| 10 | 6 | 5  | 10 | 5 | 6  | 3197.1499 | 0.0131  |
| 10 | 6 | 4  | 10 | 5 | 6  | 3197.2284 | -0.0003 |
| 10 | 6 | 4  | 10 | 5 | 5  | 3194.2263 | -0.0032 |
| 10 | 7 | 4  | 10 | 6 | 4  | 3796.3347 | 0.0006  |
| 10 | 7 | 4  | 10 | 6 | 5  | 3796.4266 | 0.0006  |
| 10 | 7 | 3  | 10 | 6 | 4  | 3796.3364 | 0.0006  |

|    |    |    |    |   |    |           |         |
|----|----|----|----|---|----|-----------|---------|
| 10 | 7  | 3  | 10 | 6 | 5  | 3796.4282 | 0.0006  |
| 10 | 8  | 3  | 10 | 7 | 3  | 4390.2717 | 0.0013  |
| 10 | 8  | 3  | 10 | 7 | 4  | 4390.2734 | 0.0013  |
| 10 | 8  | 2  | 10 | 7 | 3  | 4390.2718 | 0.0013  |
| 10 | 8  | 2  | 10 | 7 | 4  | 4390.2734 | 0.0013  |
| 10 | 9  | 2  | 10 | 8 | 3  | 4981.0923 | 0.0000  |
| 10 | 9  | 1  | 10 | 8 | 2  | 4981.0923 | 0.0000  |
| 10 | 9  | 1  | 10 | 8 | 3  | 4981.0923 | 0.0000  |
| 11 | 0  | 11 | 10 | 0 | 10 | 5125.8681 | 0.0000  |
| 11 | 0  | 11 | 10 | 1 | 10 | 5120.3314 | 0.0059  |
| 11 | 1  | 11 | 10 | 1 | 10 | 5123.2717 | 0.0000  |
| 11 | 1  | 11 | 10 | 0 | 10 | 5128.8196 | 0.0054  |
| 11 | 1  | 10 | 11 | 0 | 11 | 2268.4486 | 0.0028  |
| 11 | 1  | 10 | 10 | 2 | 9  | 5268.5899 | -0.0138 |
| 11 | 1  | 10 | 10 | 1 | 9  | 5388.7378 | -0.0001 |
| 11 | 2  | 10 | 10 | 2 | 9  | 5343.3523 | 0.0000  |
| 11 | 2  | 10 | 10 | 1 | 9  | 5463.4817 | -0.0049 |
| 11 | 2  | 10 | 11 | 1 | 11 | 2340.2507 | 0.0024  |
| 11 | 2  | 9  | 10 | 2 | 8  | 5651.9560 | -0.0059 |
| 11 | 2  | 9  | 10 | 3 | 7  | 4534.7120 | 0.0000  |
| 11 | 3  | 9  | 11 | 2 | 10 | 2080.8280 | -0.0072 |
| 11 | 3  | 9  | 10 | 2 | 8  | 6202.6660 | -0.0015 |
| 11 | 3  | 9  | 10 | 4 | 6  | 3337.2508 | 0.0003  |
| 11 | 4  | 8  | 11 | 3 | 9  | 2157.3872 | -0.0005 |
| 11 | 5  | 7  | 11 | 4 | 8  | 2595.5490 | 0.0035  |
| 11 | 6  | 6  | 11 | 5 | 7  | 3184.4479 | -0.0002 |
| 11 | 6  | 6  | 11 | 5 | 6  | 3176.6405 | -0.0006 |
| 11 | 6  | 5  | 11 | 5 | 7  | 3184.7564 | -0.0002 |
| 11 | 6  | 5  | 11 | 5 | 6  | 3176.9526 | 0.0030  |
| 11 | 7  | 5  | 11 | 6 | 6  | 3787.9834 | 0.0004  |
| 11 | 7  | 4  | 11 | 6 | 6  | 3787.9907 | 0.0004  |
| 11 | 7  | 4  | 11 | 6 | 5  | 3787.6823 | 0.0004  |
| 11 | 8  | 4  | 11 | 7 | 5  | 4384.8842 | 0.0011  |
| 11 | 8  | 3  | 11 | 7 | 4  | 4384.8770 | 0.0011  |
| 11 | 9  | 3  | 11 | 8 | 4  | 4977.4710 | 0.0000  |
| 11 | 9  | 2  | 11 | 8 | 3  | 4977.4709 | 0.0000  |
| 11 | 10 | 2  | 11 | 9 | 3  | 5567.7794 | 0.0000  |
| 11 | 10 | 1  | 11 | 9 | 2  | 5567.7794 | 0.0000  |
| 12 | 0  | 12 | 11 | 1 | 11 | 5577.2728 | 0.0023  |
| 12 | 1  | 12 | 11 | 0 | 11 | 5581.7573 | -0.0037 |
| 12 | 1  | 11 | 11 | 1 | 10 | 5835.3945 | -0.0002 |
| 12 | 1  | 11 | 11 | 2 | 10 | 5760.6460 | -0.0001 |
| 12 | 2  | 11 | 11 | 1 | 10 | 5880.2258 | -0.0018 |
| 12 | 2  | 11 | 12 | 1 | 12 | 2566.9080 | -0.0044 |
| 12 | 2  | 11 | 11 | 2 | 10 | 5805.4789 | -0.0001 |
| 12 | 2  | 10 | 11 | 3 | 8  | 4947.9855 | -0.0002 |
| 12 | 3  | 10 | 11 | 2 | 9  | 6530.1917 | -0.0018 |
| 12 | 4  | 9  | 12 | 3 | 10 | 2230.9320 | -0.0066 |
| 12 | 5  | 8  | 12 | 4 | 9  | 2595.9350 | 0.0027  |
| 12 | 6  | 7  | 12 | 5 | 8  | 3169.4530 | 0.0078  |
| 12 | 6  | 6  | 12 | 5 | 8  | 3170.3545 | -0.0009 |
| 12 | 9  | 4  | 12 | 8 | 5  | 4972.7437 | 0.0000  |
| 12 | 9  | 3  | 12 | 8 | 4  | 4972.7431 | 0.0000  |
| 12 | 10 | 3  | 12 | 9 | 4  | 5564.4593 | 0.0000  |
| 12 | 10 | 2  | 12 | 9 | 3  | 5564.4593 | 0.0000  |

|    |    |    |    |   |    |           |         |
|----|----|----|----|---|----|-----------|---------|
| 13 | 0  | 13 | 12 | 0 | 12 | 6034.8490 | -0.0031 |
| 13 | 0  | 13 | 12 | 1 | 12 | 6033.3033 | -0.0045 |
| 13 | 1  | 13 | 12 | 1 | 12 | 6034.1000 | -0.0080 |
| 13 | 1  | 13 | 12 | 0 | 12 | 6035.6507 | -0.0017 |
| 13 | 1  | 12 | 12 | 2 | 11 | 6238.9823 | 0.0000  |
| 13 | 2  | 12 | 13 | 1 | 13 | 2797.9070 | -0.0029 |
| 13 | 2  | 12 | 12 | 1 | 11 | 6309.9422 | 0.0038  |
| 13 | 2  | 11 | 12 | 3 | 9  | 5287.1614 | -0.0017 |
| 13 | 3  | 11 | 12 | 2 | 10 | 6865.3920 | 0.0073  |
| 13 | 7  | 6  | 13 | 6 | 7  | 3760.9640 | 0.0074  |
| 13 | 9  | 5  | 13 | 8 | 6  | 4966.6991 | 0.0000  |
| 13 | 9  | 4  | 13 | 8 | 5  | 4966.6970 | 0.0000  |
| 13 | 10 | 4  | 13 | 9 | 5  | 5560.2142 | -0.0001 |
| 13 | 10 | 3  | 13 | 9 | 4  | 5560.2141 | -0.0001 |
| 14 | 0  | 14 | 13 | 1 | 13 | 6488.8482 | 0.0016  |
| 14 | 1  | 14 | 13 | 0 | 13 | 6490.0555 | -0.0020 |
| 14 | 1  | 13 | 13 | 2 | 12 | 6708.0655 | 0.0000  |
| 14 | 1  | 13 | 14 | 0 | 14 | 3017.1250 | -0.0038 |
| 14 | 2  | 13 | 13 | 1 | 12 | 6749.0633 | 0.0000  |
| 14 | 3  | 12 | 13 | 4 | 10 | 4601.1177 | -0.0002 |
| 14 | 10 | 5  | 14 | 9 | 6  | 5554.8829 | -0.0001 |
| 14 | 10 | 4  | 14 | 9 | 5  | 5554.8828 | -0.0001 |
| 15 | 0  | 15 | 14 | 1 | 14 | 6944.1127 | -0.0014 |
| 15 | 1  | 15 | 14 | 2 | 13 | 3912.7304 | 0.0000  |
| 15 | 1  | 15 | 14 | 0 | 14 | 6944.7324 | -0.0014 |
| 15 | 5  | 11 | 15 | 4 | 12 | 2676.1250 | -0.0045 |
| 15 | 6  | 9  | 14 | 7 | 8  | 3841.7523 | 0.0010  |
| 19 | 7  | 12 | 18 | 8 | 11 | 5349.4725 | 0.0092  |

**Table S8.** Experimental transition frequencies of the observed parent species of conformer **IV** of the TFB dimer.

| $J'$ | $Ka'$ | $Kc'$ | $J''$ | $Ka''$ | $Kc''$ | $\nu_{\text{obs}}/\text{MHz}$ | $\Delta\nu_{\text{obs-calc}}/\text{MHz}$ |
|------|-------|-------|-------|--------|--------|-------------------------------|------------------------------------------|
| 3    | 2     | 2     | 2     | 1      | 1      | 2299.9459                     | 0.0000                                   |
| 3    | 2     | 2     | 2     | 1      | 2      | 2487.0596                     | -0.0002                                  |
| 3    | 2     | 1     | 2     | 1      | 2      | 2545.8056                     | -0.0003                                  |
| 3    | 2     | 1     | 2     | 1      | 1      | 2358.6919                     | -0.0001                                  |
| 3    | 3     | 1     | 2     | 2      | 1      | 2867.8212                     | -0.0001                                  |
| 3    | 3     | 1     | 2     | 2      | 0      | 2855.4956                     | 0.0000                                   |
| 3    | 3     | 0     | 2     | 2      | 0      | 2857.0541                     | -0.0001                                  |
| 3    | 3     | 0     | 2     | 2      | 1      | 2869.3798                     | -0.0001                                  |
| 4    | 0     | 4     | 3     | 1      | 3      | 2056.5365                     | -0.0005                                  |
| 4    | 0     | 4     | 3     | 0      | 3      | 2154.7300                     | 0.0000                                   |
| 4    | 1     | 4     | 3     | 0      | 3      | 2209.6006                     | -0.0072                                  |
| 4    | 1     | 3     | 3     | 0      | 3      | 2822.6388                     | -0.0002                                  |
| 4    | 2     | 3     | 3     | 1      | 2      | 2769.5420                     | 0.0002                                   |
| 4    | 2     | 3     | 3     | 2      | 2      | 2247.1437                     | 0.0000                                   |
| 4    | 2     | 3     | 3     | 1      | 3      | 3142.2045                     | -0.0002                                  |
| 4    | 2     | 2     | 3     | 1      | 2      | 2930.2088                     | -0.0005                                  |
| 4    | 2     | 2     | 3     | 1      | 3      | 3302.8721                     | -0.0001                                  |
| 4    | 3     | 2     | 3     | 3      | 1      | 2277.4985                     | 0.0000                                   |
| 4    | 3     | 2     | 3     | 2      | 1      | 3393.9474                     | 0.0004                                   |
| 4    | 3     | 2     | 3     | 2      | 2      | 3452.6960                     | 0.0029                                   |
| 4    | 3     | 1     | 3     | 2      | 1      | 3404.6040                     | -0.0001                                  |
| 4    | 3     | 1     | 3     | 2      | 2      | 3463.3509                     | 0.0007                                   |

|   |   |   |   |   |   |           |         |
|---|---|---|---|---|---|-----------|---------|
| 4 | 4 | 1 | 3 | 3 | 0 | 3893.2509 | 0.0030  |
| 4 | 4 | 0 | 3 | 3 | 1 | 3894.9722 | 0.0030  |
| 4 | 4 | 0 | 3 | 3 | 0 | 3893.4200 | 0.0093  |
| 5 | 0 | 5 | 4 | 1 | 4 | 2597.1808 | -0.0006 |
| 5 | 0 | 5 | 4 | 0 | 4 | 2652.0591 | 0.0000  |
| 5 | 1 | 5 | 4 | 0 | 4 | 2679.5766 | 0.0001  |
| 5 | 1 | 4 | 4 | 2 | 3 | 2488.7635 | -0.0005 |
| 5 | 1 | 4 | 4 | 1 | 3 | 2906.5224 | -0.0002 |
| 5 | 1 | 4 | 4 | 0 | 4 | 3574.4420 | 0.0104  |
| 5 | 1 | 4 | 4 | 2 | 2 | 2328.0990 | 0.0026  |
| 5 | 2 | 4 | 4 | 2 | 3 | 2793.7140 | -0.0003 |
| 5 | 2 | 4 | 4 | 1 | 4 | 3824.5027 | -0.0015 |
| 5 | 2 | 4 | 4 | 1 | 3 | 3211.4733 | 0.0003  |
| 5 | 2 | 3 | 4 | 1 | 4 | 4152.8278 | 0.0002  |
| 5 | 2 | 3 | 4 | 1 | 3 | 3539.7962 | -0.0001 |
| 5 | 3 | 3 | 4 | 2 | 2 | 3894.5380 | 0.0019  |
| 5 | 3 | 3 | 4 | 2 | 3 | 4055.2028 | -0.0008 |
| 5 | 3 | 2 | 4 | 2 | 3 | 4095.8414 | 0.0019  |
| 5 | 3 | 2 | 4 | 2 | 2 | 3935.1717 | -0.0002 |
| 5 | 4 | 2 | 4 | 3 | 2 | 4465.6292 | -0.0005 |
| 5 | 4 | 2 | 4 | 3 | 1 | 4454.9704 | -0.0021 |
| 5 | 4 | 1 | 4 | 3 | 2 | 4467.0740 | 0.0015  |
| 5 | 4 | 1 | 4 | 3 | 1 | 4456.4150 | -0.0004 |
| 5 | 5 | 1 | 4 | 4 | 1 | 4925.7084 | -0.0001 |
| 5 | 5 | 1 | 4 | 4 | 0 | 4925.5492 | 0.0035  |
| 5 | 5 | 0 | 4 | 4 | 0 | 4925.5610 | -0.0001 |
| 5 | 5 | 0 | 4 | 4 | 1 | 4925.7250 | 0.0011  |
| 6 | 0 | 6 | 5 | 1 | 5 | 3120.3995 | -0.0003 |
| 6 | 1 | 6 | 5 | 0 | 5 | 3160.7313 | 0.0001  |
| 6 | 1 | 6 | 5 | 1 | 5 | 3133.2330 | 0.0191  |
| 6 | 1 | 5 | 5 | 2 | 4 | 3131.0240 | -0.0020 |
| 6 | 1 | 5 | 5 | 0 | 5 | 4358.3512 | 0.0023  |
| 6 | 1 | 5 | 5 | 2 | 3 | 2802.7000 | -0.0027 |
| 6 | 1 | 5 | 5 | 1 | 4 | 3435.9763 | -0.0002 |
| 6 | 2 | 5 | 5 | 1 | 5 | 4530.9878 | -0.0023 |
| 6 | 2 | 5 | 5 | 1 | 4 | 3636.1353 | 0.0003  |
| 6 | 2 | 5 | 5 | 2 | 4 | 3331.1843 | -0.0003 |
| 6 | 2 | 4 | 5 | 2 | 3 | 3562.8540 | 0.0052  |
| 6 | 2 | 4 | 5 | 1 | 4 | 4196.1256 | 0.0031  |
| 6 | 2 | 4 | 5 | 1 | 5 | 5090.9779 | 0.0002  |
| 6 | 3 | 4 | 5 | 2 | 3 | 4351.9197 | 0.0004  |
| 6 | 3 | 4 | 5 | 2 | 4 | 4680.2428 | 0.0001  |
| 6 | 3 | 3 | 5 | 2 | 3 | 4463.7994 | -0.0002 |
| 6 | 3 | 3 | 5 | 3 | 2 | 3490.0000 | 0.0022  |
| 6 | 3 | 3 | 5 | 2 | 4 | 4792.1249 | 0.0019  |
| 6 | 4 | 3 | 5 | 3 | 3 | 5041.3810 | 0.0061  |
| 6 | 4 | 3 | 5 | 3 | 2 | 5000.7392 | 0.0001  |
| 6 | 4 | 2 | 5 | 3 | 3 | 5048.3961 | 0.0001  |
| 6 | 4 | 2 | 5 | 3 | 2 | 5007.7601 | 0.0000  |
| 6 | 5 | 2 | 6 | 4 | 3 | 2068.5204 | 0.0008  |
| 6 | 5 | 2 | 5 | 4 | 1 | 5492.4738 | -0.0024 |
| 6 | 5 | 2 | 5 | 4 | 2 | 5493.9189 | -0.0003 |
| 6 | 5 | 1 | 5 | 4 | 1 | 5492.6429 | -0.0003 |
| 6 | 5 | 1 | 5 | 4 | 2 | 5494.0821 | -0.0039 |
| 6 | 6 | 1 | 6 | 5 | 1 | 2540.4006 | 0.0004  |

|   |   |   |   |   |   |           |         |
|---|---|---|---|---|---|-----------|---------|
| 6 | 6 | 1 | 5 | 5 | 1 | 5957.0989 | -0.0004 |
| 6 | 6 | 1 | 6 | 5 | 2 | 2540.5675 | 0.0004  |
| 6 | 6 | 1 | 5 | 5 | 0 | 5957.0787 | -0.0053 |
| 6 | 6 | 0 | 6 | 5 | 1 | 2540.4019 | 0.0004  |
| 6 | 6 | 0 | 5 | 5 | 1 | 5957.0981 | -0.0026 |
| 6 | 6 | 0 | 6 | 5 | 2 | 2540.5688 | 0.0004  |
| 6 | 6 | 0 | 5 | 5 | 0 | 5957.0849 | -0.0004 |
| 7 | 0 | 7 | 6 | 1 | 6 | 3632.8934 | 0.0021  |
| 7 | 0 | 7 | 6 | 0 | 6 | 3645.7027 | -0.0026 |
| 7 | 1 | 7 | 6 | 1 | 6 | 3638.5675 | 0.0000  |
| 7 | 1 | 7 | 6 | 0 | 6 | 3651.3834 | 0.0019  |
| 7 | 1 | 6 | 6 | 1 | 5 | 3941.5089 | 0.0000  |
| 7 | 1 | 6 | 6 | 0 | 6 | 5151.9373 | -0.0033 |
| 7 | 1 | 6 | 6 | 2 | 5 | 3741.3528 | 0.0024  |
| 7 | 2 | 6 | 6 | 3 | 3 | 2398.4010 | 0.0131  |
| 7 | 2 | 6 | 6 | 1 | 5 | 4059.4851 | 0.0003  |
| 7 | 2 | 6 | 6 | 1 | 6 | 5257.1026 | 0.0001  |
| 7 | 2 | 6 | 6 | 2 | 5 | 3859.3263 | 0.0000  |
| 7 | 2 | 5 | 6 | 1 | 5 | 4905.4712 | -0.0013 |
| 7 | 2 | 5 | 6 | 2 | 4 | 4145.3265 | 0.0001  |
| 7 | 2 | 5 | 6 | 3 | 4 | 3356.2430 | -0.0130 |
| 7 | 2 | 5 | 6 | 1 | 6 | 6103.0904 | 0.0001  |
| 7 | 2 | 5 | 6 | 3 | 3 | 3244.3754 | -0.0002 |
| 7 | 3 | 5 | 6 | 2 | 4 | 4770.8121 | -0.0036 |
| 7 | 3 | 5 | 6 | 2 | 5 | 5330.8033 | 0.0001  |
| 7 | 3 | 5 | 6 | 3 | 4 | 3981.7452 | 0.0000  |
| 7 | 3 | 4 | 6 | 2 | 4 | 5015.4260 | 0.0001  |
| 7 | 3 | 4 | 6 | 2 | 5 | 5575.4135 | 0.0001  |
| 7 | 4 | 4 | 6 | 4 | 3 | 4004.2417 | 0.0001  |
| 7 | 4 | 4 | 6 | 3 | 4 | 5626.8631 | -0.0002 |
| 7 | 4 | 4 | 6 | 3 | 3 | 5514.9803 | -0.0027 |
| 7 | 4 | 3 | 6 | 3 | 4 | 5651.4717 | 0.0005  |
| 7 | 4 | 3 | 6 | 4 | 2 | 4021.8287 | 0.0001  |
| 7 | 4 | 3 | 6 | 3 | 3 | 5539.5910 | 0.0001  |
| 7 | 5 | 3 | 6 | 4 | 2 | 6055.1368 | 0.0005  |
| 7 | 5 | 3 | 6 | 5 | 2 | 3993.6378 | 0.0001  |
| 7 | 5 | 3 | 6 | 4 | 3 | 6062.1524 | -0.0049 |
| 7 | 5 | 3 | 7 | 4 | 4 | 2057.9165 | 0.0008  |
| 7 | 5 | 2 | 6 | 5 | 1 | 3994.4530 | 0.0001  |
| 7 | 5 | 2 | 6 | 4 | 3 | 6063.1400 | 0.0006  |
| 7 | 5 | 2 | 7 | 4 | 3 | 2034.2906 | 0.0007  |
| 7 | 5 | 2 | 6 | 4 | 2 | 6056.1188 | 0.0003  |
| 7 | 6 | 2 | 6 | 5 | 1 | 6524.9375 | 0.0003  |
| 7 | 6 | 2 | 6 | 5 | 2 | 6525.1043 | 0.0002  |
| 7 | 6 | 2 | 7 | 5 | 2 | 2530.4845 | 0.0002  |
| 7 | 6 | 2 | 7 | 5 | 3 | 2531.4666 | 0.0003  |
| 7 | 6 | 1 | 7 | 5 | 2 | 2530.5020 | 0.0002  |
| 7 | 6 | 1 | 7 | 5 | 3 | 2531.4841 | 0.0003  |
| 7 | 6 | 1 | 6 | 5 | 2 | 6525.1219 | 0.0003  |
| 7 | 6 | 1 | 6 | 5 | 1 | 6524.9549 | 0.0002  |
| 7 | 7 | 1 | 6 | 6 | 1 | 6988.5151 | -0.0002 |
| 7 | 7 | 1 | 6 | 6 | 0 | 6988.5138 | -0.0002 |
| 7 | 7 | 1 | 7 | 6 | 2 | 3003.9791 | 0.0007  |
| 7 | 7 | 0 | 6 | 6 | 0 | 6988.5139 | -0.0002 |
| 7 | 7 | 0 | 7 | 6 | 1 | 3003.9617 | 0.0007  |

|   |   |   |   |   |   |           |         |
|---|---|---|---|---|---|-----------|---------|
| 7 | 7 | 0 | 6 | 6 | 1 | 6988.5152 | -0.0002 |
| 8 | 0 | 8 | 7 | 0 | 7 | 4145.3346 | -0.0001 |
| 8 | 0 | 8 | 7 | 1 | 7 | 4139.6590 | 0.0006  |
| 8 | 1 | 8 | 7 | 1 | 7 | 4142.0857 | 0.0000  |
| 8 | 1 | 8 | 7 | 0 | 7 | 4147.7647 | 0.0027  |
| 8 | 1 | 7 | 7 | 1 | 6 | 4433.5362 | -0.0002 |
| 8 | 1 | 7 | 7 | 0 | 7 | 5939.7719 | 0.0001  |
| 8 | 1 | 7 | 7 | 2 | 6 | 4315.5627 | 0.0021  |
| 8 | 2 | 7 | 7 | 1 | 6 | 4496.9478 | -0.0002 |
| 8 | 2 | 7 | 7 | 1 | 7 | 5997.5072 | 0.0001  |
| 8 | 2 | 7 | 7 | 2 | 6 | 4378.9717 | -0.0004 |
| 8 | 2 | 7 | 7 | 3 | 4 | 2662.8810 | -0.0040 |
| 8 | 2 | 6 | 7 | 3 | 4 | 3832.7790 | -0.0036 |
| 8 | 2 | 6 | 7 | 1 | 6 | 5666.8457 | 0.0001  |
| 8 | 2 | 6 | 7 | 3 | 5 | 4077.3943 | 0.0015  |
| 8 | 2 | 6 | 7 | 2 | 5 | 4702.8821 | 0.0001  |
| 8 | 3 | 6 | 7 | 3 | 5 | 4536.1210 | 0.0000  |
| 8 | 3 | 6 | 7 | 2 | 6 | 6007.5980 | 0.0001  |
| 8 | 3 | 6 | 7 | 2 | 5 | 5161.6120 | 0.0018  |
| 8 | 3 | 6 | 7 | 4 | 3 | 2866.3945 | -0.0004 |
| 8 | 3 | 5 | 7 | 3 | 4 | 4740.3186 | 0.0002  |
| 8 | 3 | 5 | 7 | 4 | 4 | 3339.8124 | 0.0019  |
| 8 | 3 | 5 | 7 | 2 | 5 | 5610.4183 | 0.0004  |
| 8 | 3 | 5 | 7 | 2 | 6 | 6456.4056 | 0.0000  |
| 8 | 4 | 5 | 7 | 3 | 5 | 6227.8647 | 0.0001  |
| 8 | 4 | 5 | 7 | 3 | 4 | 5983.2552 | 0.0008  |
| 8 | 4 | 5 | 7 | 4 | 4 | 4582.7461 | -0.0003 |
| 8 | 4 | 5 | 7 | 5 | 2 | 2523.8483 | -0.0004 |
| 8 | 4 | 4 | 7 | 3 | 4 | 6051.9290 | -0.0207 |
| 8 | 4 | 4 | 8 | 1 | 7 | 3452.4754 | -0.0009 |
| 8 | 4 | 4 | 7 | 4 | 3 | 4626.8338 | -0.0001 |
| 8 | 4 | 4 | 7 | 3 | 5 | 6296.5612 | 0.0013  |
| 8 | 4 | 4 | 7 | 5 | 3 | 2593.5258 | -0.0003 |
| 8 | 5 | 4 | 7 | 5 | 3 | 4573.8214 | 0.0000  |
| 8 | 5 | 4 | 7 | 4 | 3 | 6607.1299 | 0.0009  |
| 8 | 5 | 4 | 7 | 4 | 4 | 6631.7370 | 0.0000  |
| 8 | 5 | 4 | 8 | 4 | 5 | 2048.9915 | 0.0009  |
| 8 | 5 | 3 | 7 | 5 | 2 | 4576.9713 | -0.0002 |
| 8 | 5 | 3 | 7 | 4 | 4 | 6635.8704 | 0.0011  |
| 8 | 5 | 3 | 7 | 4 | 3 | 6611.2615 | 0.0001  |
| 8 | 5 | 3 | 8 | 4 | 5 | 2053.1238 | 0.0010  |
| 8 | 6 | 3 | 7 | 6 | 2 | 4560.8883 | 0.0000  |
| 8 | 6 | 3 | 8 | 5 | 4 | 2518.5334 | 0.0001  |
| 8 | 6 | 2 | 8 | 5 | 3 | 2514.5216 | 0.0001  |
| 8 | 6 | 2 | 7 | 6 | 1 | 4560.9913 | 0.0000  |
| 8 | 7 | 2 | 8 | 6 | 3 | 2995.7103 | 0.0007  |
| 8 | 7 | 1 | 8 | 6 | 2 | 2995.5915 | 0.0007  |
| 8 | 8 | 1 | 8 | 7 | 1 | 3467.2887 | 0.0005  |
| 8 | 8 | 1 | 8 | 7 | 2 | 3467.2903 | 0.0004  |
| 8 | 8 | 0 | 8 | 7 | 1 | 3467.2886 | 0.0004  |
| 8 | 8 | 0 | 8 | 7 | 2 | 3467.2904 | 0.0005  |
| 9 | 0 | 9 | 8 | 1 | 8 | 4643.6368 | 0.0026  |
| 9 | 0 | 9 | 8 | 0 | 8 | 4646.0614 | -0.0001 |
| 9 | 1 | 9 | 8 | 1 | 8 | 4644.6458 | 0.0003  |
| 9 | 1 | 9 | 8 | 0 | 8 | 4647.0768 | 0.0040  |

|    |   |    |    |   |    |           |         |
|----|---|----|----|---|----|-----------|---------|
| 9  | 1 | 8  | 9  | 0 | 9  | 2071.7940 | 0.0004  |
| 9  | 1 | 8  | 8  | 2 | 7  | 4860.0090 | 0.0026  |
| 9  | 2 | 8  | 8  | 1 | 8  | 6747.2077 | 0.0000  |
| 9  | 2 | 8  | 8  | 2 | 7  | 4891.7863 | 0.0000  |
| 9  | 2 | 8  | 9  | 1 | 9  | 2102.5592 | -0.0030 |
| 9  | 2 | 8  | 8  | 1 | 7  | 4955.1960 | -0.0018 |
| 9  | 2 | 7  | 8  | 3 | 6  | 4772.8036 | 0.0047  |
| 9  | 2 | 7  | 8  | 2 | 6  | 5231.5272 | 0.0001  |
| 9  | 2 | 7  | 9  | 1 | 9  | 3612.1965 | -0.0042 |
| 9  | 2 | 7  | 8  | 1 | 7  | 6464.8363 | 0.0000  |
| 9  | 2 | 7  | 8  | 3 | 5  | 4323.9911 | -0.0002 |
| 9  | 3 | 7  | 8  | 2 | 6  | 5539.0547 | -0.0075 |
| 9  | 3 | 7  | 8  | 2 | 7  | 6708.9599 | 0.0000  |
| 9  | 3 | 7  | 8  | 4 | 4  | 3319.8948 | -0.0003 |
| 9  | 3 | 6  | 8  | 4 | 5  | 4110.0014 | 0.0083  |
| 9  | 3 | 6  | 8  | 2 | 6  | 6260.4650 | 0.0001  |
| 9  | 3 | 6  | 8  | 4 | 4  | 4041.2981 | 0.0003  |
| 9  | 4 | 6  | 8  | 3 | 6  | 6849.7495 | 0.0000  |
| 9  | 4 | 6  | 8  | 4 | 5  | 5158.0061 | 0.0001  |
| 9  | 4 | 6  | 8  | 5 | 3  | 3104.8828 | -0.0003 |
| 9  | 4 | 6  | 8  | 3 | 5  | 6400.9425 | 0.0006  |
| 9  | 4 | 5  | 9  | 1 | 8  | 3778.3270 | -0.0033 |
| 9  | 4 | 5  | 8  | 3 | 6  | 7009.7108 | 0.0000  |
| 9  | 4 | 5  | 8  | 4 | 4  | 5249.2724 | 0.0005  |
| 9  | 4 | 5  | 8  | 5 | 4  | 3268.9768 | 0.0001  |
| 9  | 4 | 5  | 8  | 3 | 5  | 6560.9052 | 0.0020  |
| 9  | 5 | 5  | 8  | 5 | 4  | 5156.6815 | 0.0001  |
| 9  | 5 | 5  | 9  | 4 | 6  | 2047.6671 | 0.0012  |
| 9  | 5 | 4  | 8  | 5 | 3  | 5166.3987 | 0.0001  |
| 9  | 5 | 4  | 8  | 6 | 2  | 2651.8768 | -0.0002 |
| 9  | 5 | 4  | 8  | 6 | 3  | 2651.9973 | -0.0002 |
| 9  | 6 | 4  | 8  | 6 | 3  | 5140.0816 | 0.0001  |
| 9  | 6 | 4  | 9  | 5 | 5  | 2501.9334 | 0.0000  |
| 9  | 6 | 3  | 9  | 5 | 5  | 2502.5226 | 0.0000  |
| 9  | 6 | 3  | 8  | 6 | 2  | 5140.5503 | 0.0001  |
| 9  | 6 | 3  | 9  | 5 | 4  | 2488.6730 | -0.0001 |
| 9  | 7 | 3  | 9  | 6 | 4  | 2983.9480 | 0.0007  |
| 9  | 7 | 2  | 9  | 6 | 3  | 2983.3723 | 0.0007  |
| 9  | 8 | 2  | 9  | 7 | 3  | 3459.7388 | -0.0016 |
| 9  | 8 | 2  | 9  | 7 | 2  | 3459.7274 | 0.0005  |
| 9  | 8 | 1  | 9  | 7 | 2  | 3459.7255 | -0.0016 |
| 9  | 8 | 1  | 9  | 7 | 3  | 3459.7410 | 0.0005  |
| 9  | 9 | 1  | 9  | 8 | 2  | 3930.5087 | 0.0014  |
| 9  | 9 | 1  | 9  | 8 | 1  | 3930.5073 | 0.0002  |
| 9  | 9 | 0  | 9  | 8 | 2  | 3930.5075 | 0.0002  |
| 9  | 9 | 0  | 9  | 8 | 1  | 3930.5086 | 0.0014  |
| 10 | 0 | 10 | 9  | 1 | 9  | 5146.3300 | -0.0009 |
| 10 | 0 | 10 | 9  | 0 | 9  | 5147.3422 | 0.0001  |
| 10 | 1 | 10 | 9  | 1 | 9  | 5146.7439 | 0.0001  |
| 10 | 1 | 10 | 9  | 0 | 9  | 5147.7557 | 0.0007  |
| 10 | 1 | 9  | 9  | 2 | 8  | 5384.6195 | 0.0038  |
| 10 | 1 | 9  | 9  | 1 | 8  | 5416.3948 | -0.0007 |
| 10 | 1 | 9  | 10 | 0 | 10 | 2340.8500 | 0.0030  |
| 10 | 2 | 9  | 9  | 1 | 8  | 5431.5280 | -0.0021 |
| 10 | 2 | 9  | 10 | 1 | 10 | 2355.5710 | 0.0023  |

|    |    |    |    |   |    |           |         |
|----|----|----|----|---|----|-----------|---------|
| 10 | 2  | 9  | 9  | 2 | 8  | 5399.7502 | 0.0000  |
| 10 | 2  | 8  | 9  | 3 | 7  | 5426.1160 | 0.0012  |
| 10 | 2  | 8  | 9  | 2 | 7  | 5733.6499 | 0.0000  |
| 10 | 3  | 8  | 9  | 3 | 7  | 5614.0012 | 0.0001  |
| 10 | 3  | 8  | 9  | 4 | 5  | 3684.6239 | -0.0003 |
| 10 | 3  | 8  | 10 | 2 | 9  | 2031.4246 | 0.0001  |
| 10 | 3  | 8  | 9  | 2 | 7  | 5921.5356 | -0.0007 |
| 10 | 3  | 7  | 9  | 4 | 5  | 4734.5139 | 0.0003  |
| 10 | 3  | 7  | 9  | 3 | 6  | 5942.4878 | 0.0001  |
| 10 | 3  | 7  | 9  | 4 | 6  | 4894.4752 | 0.0004  |
| 10 | 3  | 7  | 9  | 2 | 7  | 6971.4150 | -0.0105 |
| 10 | 4  | 7  | 9  | 4 | 6  | 5726.8969 | 0.0001  |
| 10 | 4  | 7  | 9  | 3 | 6  | 6774.9097 | 0.0000  |
| 10 | 4  | 7  | 9  | 5 | 4  | 3665.3780 | -0.0034 |
| 10 | 4  | 6  | 9  | 4 | 5  | 5885.5706 | 0.0000  |
| 10 | 4  | 6  | 9  | 5 | 5  | 3997.8665 | 0.0005  |
| 10 | 4  | 6  | 10 | 1 | 9  | 4247.5062 | 0.0009  |
| 10 | 4  | 6  | 9  | 5 | 4  | 3984.0170 | 0.0004  |
| 10 | 5  | 6  | 9  | 5 | 5  | 5741.0181 | 0.0001  |
| 10 | 5  | 6  | 9  | 6 | 3  | 3238.4980 | 0.0026  |
| 10 | 5  | 6  | 9  | 6 | 4  | 3239.0846 | 0.0000  |
| 10 | 5  | 6  | 10 | 4 | 7  | 2061.7888 | 0.0017  |
| 10 | 5  | 5  | 10 | 2 | 8  | 4171.0086 | 0.0001  |
| 10 | 5  | 5  | 9  | 6 | 4  | 3278.1085 | 0.0001  |
| 10 | 6  | 5  | 9  | 6 | 4  | 5722.3408 | 0.0001  |
| 10 | 6  | 5  | 10 | 5 | 6  | 2483.2520 | -0.0041 |
| 10 | 6  | 4  | 10 | 5 | 5  | 2446.5167 | -0.0003 |
| 10 | 6  | 4  | 9  | 6 | 3  | 5724.0363 | 0.0001  |
| 10 | 7  | 4  | 10 | 6 | 5  | 2968.0123 | 0.0006  |
| 10 | 7  | 3  | 10 | 6 | 4  | 2965.8026 | 0.0005  |
| 10 | 8  | 3  | 10 | 7 | 3  | 3449.2385 | 0.0000  |
| 10 | 8  | 3  | 10 | 7 | 4  | 3449.3136 | 0.0000  |
| 10 | 8  | 2  | 10 | 7 | 3  | 3449.2399 | 0.0000  |
| 10 | 8  | 2  | 10 | 7 | 4  | 3449.3150 | 0.0000  |
| 10 | 9  | 2  | 10 | 8 | 3  | 3923.4880 | -0.0027 |
| 10 | 9  | 2  | 10 | 8 | 2  | 3923.4895 | 0.0002  |
| 10 | 9  | 1  | 10 | 8 | 2  | 3923.4870 | -0.0023 |
| 10 | 9  | 1  | 10 | 8 | 3  | 3923.4909 | 0.0002  |
| 10 | 10 | 1  | 10 | 9 | 1  | 4393.6547 | 0.0001  |
| 10 | 10 | 1  | 10 | 9 | 2  | 4393.6547 | 0.0001  |
| 10 | 10 | 0  | 10 | 9 | 2  | 4393.6547 | 0.0001  |
| 10 | 10 | 0  | 10 | 9 | 1  | 4393.6547 | 0.0001  |
| 11 | 0  | 11 | 10 | 1 | 10 | 5648.4670 | 0.0005  |
| 11 | 0  | 11 | 10 | 0 | 10 | 5648.8796 | 0.0003  |
| 11 | 1  | 11 | 10 | 1 | 10 | 5648.6327 | 0.0003  |
| 11 | 1  | 11 | 10 | 0 | 10 | 5649.0493 | 0.0041  |
| 11 | 1  | 10 | 11 | 0 | 11 | 2604.8137 | -0.0018 |
| 11 | 1  | 10 | 10 | 1 | 9  | 5912.8350 | -0.0128 |
| 11 | 1  | 10 | 10 | 2 | 9  | 5897.7126 | -0.0007 |
| 11 | 1  | 10 | 10 | 2 | 8  | 4054.1747 | -0.0005 |
| 11 | 2  | 10 | 10 | 1 | 9  | 5919.7864 | -0.0006 |
| 11 | 2  | 10 | 11 | 1 | 11 | 2611.5930 | 0.0042  |
| 11 | 2  | 10 | 10 | 2 | 9  | 5904.6526 | 0.0001  |
| 11 | 2  | 9  | 11 | 1 | 10 | 2165.9933 | 0.0029  |
| 11 | 2  | 9  | 10 | 3 | 8  | 6032.2792 | 0.0000  |



|    |    |    |    |    |    |           |         |
|----|----|----|----|----|----|-----------|---------|
| 11 | 2  | 9  | 10 | 2  | 8  | 6220.1657 | 0.0001  |
| 11 | 2  | 9  | 10 | 3  | 7  | 4982.3950 | 0.0050  |
| 11 | 3  | 9  | 10 | 4  | 7  | 4255.5878 | -0.0003 |
| 11 | 3  | 9  | 10 | 2  | 8  | 6325.7846 | -0.0011 |
| 11 | 3  | 9  | 11 | 2  | 10 | 2264.6713 | 0.0000  |
| 11 | 3  | 9  | 10 | 4  | 6  | 3936.9524 | -0.0005 |
| 11 | 3  | 9  | 11 | 0  | 11 | 4876.4264 | 0.0004  |
| 11 | 3  | 9  | 10 | 3  | 8  | 6137.8995 | 0.0001  |
| 11 | 3  | 8  | 10 | 3  | 7  | 6502.9704 | 0.0000  |
| 11 | 3  | 8  | 10 | 4  | 7  | 5670.5360 | -0.0123 |
| 11 | 4  | 8  | 11 | 3  | 9  | 2031.1568 | 0.0030  |
| 11 | 4  | 8  | 10 | 5  | 5  | 4185.9309 | -0.0001 |
| 11 | 4  | 7  | 10 | 5  | 6  | 4779.6810 | -0.0050 |
| 11 | 5  | 7  | 11 | 4  | 8  | 2099.7500 | -0.0052 |
| 11 | 5  | 7  | 10 | 6  | 4  | 3839.1696 | 0.0005  |
| 11 | 5  | 7  | 10 | 5  | 6  | 6324.7101 | 0.0001  |
| 11 | 5  | 6  | 10 | 5  | 5  | 6380.7999 | 0.0002  |
| 11 | 5  | 6  | 10 | 6  | 5  | 3936.5680 | 0.0007  |
| 11 | 6  | 6  | 10 | 7  | 3  | 3339.5366 | 0.0002  |
| 11 | 6  | 6  | 11 | 5  | 7  | 2466.1691 | -0.0002 |
| 11 | 6  | 5  | 11 | 5  | 6  | 2378.5009 | -0.0007 |
| 11 | 6  | 5  | 10 | 7  | 4  | 3347.0550 | -0.0023 |
| 11 | 7  | 5  | 11 | 6  | 5  | 2940.1096 | -0.0004 |
| 11 | 7  | 5  | 11 | 6  | 6  | 2947.5562 | 0.0005  |
| 11 | 7  | 4  | 11 | 6  | 5  | 2940.4397 | -0.0001 |
| 11 | 8  | 4  | 11 | 7  | 5  | 3435.3440 | -0.0001 |
| 11 | 8  | 4  | 10 | 8  | 3  | 6273.1978 | 0.0001  |
| 11 | 8  | 4  | 11 | 7  | 4  | 3435.0141 | -0.0001 |
| 11 | 8  | 3  | 11 | 7  | 5  | 3435.3528 | -0.0001 |
| 11 | 8  | 3  | 11 | 7  | 4  | 3435.0229 | -0.0001 |
| 11 | 8  | 3  | 10 | 8  | 2  | 6273.2052 | 0.0001  |
| 11 | 9  | 3  | 10 | 9  | 2  | 6263.7936 | 0.0001  |
| 11 | 9  | 3  | 11 | 8  | 4  | 3914.0833 | -0.0032 |
| 11 | 9  | 2  | 11 | 8  | 3  | 3914.0770 | -0.0008 |
| 11 | 9  | 2  | 10 | 9  | 1  | 6263.7937 | 0.0001  |
| 11 | 10 | 2  | 11 | 9  | 3  | 4387.0396 | 0.0001  |
| 11 | 10 | 2  | 11 | 9  | 2  | 4387.0394 | 0.0001  |
| 11 | 10 | 1  | 11 | 9  | 3  | 4387.0396 | 0.0001  |
| 11 | 10 | 1  | 11 | 9  | 2  | 4387.0394 | 0.0001  |
| 11 | 11 | 1  | 11 | 10 | 1  | 4856.7510 | 0.0042  |
| 11 | 11 | 0  | 11 | 10 | 2  | 4856.7510 | 0.0041  |
| 12 | 0  | 12 | 11 | 0  | 11 | 6150.5286 | 0.0002  |
| 12 | 0  | 12 | 11 | 1  | 11 | 6150.3638 | 0.0012  |
| 12 | 1  | 12 | 11 | 1  | 11 | 6150.4285 | 0.0002  |
| 12 | 1  | 12 | 11 | 0  | 11 | 6150.5954 | 0.0012  |
| 12 | 1  | 11 | 11 | 2  | 10 | 6404.7262 | -0.0005 |
| 12 | 1  | 11 | 12 | 0  | 12 | 2865.9522 | -0.0008 |
| 12 | 2  | 11 | 11 | 1  | 10 | 6414.7552 | -0.0005 |
| 12 | 2  | 10 | 12 | 1  | 11 | 2458.0907 | 0.0001  |
| 12 | 2  | 10 | 11 | 3  | 9  | 6598.1459 | 0.0000  |
| 12 | 3  | 10 | 11 | 2  | 9  | 6759.3268 | -0.0012 |
| 12 | 3  | 10 | 12 | 2  | 11 | 2510.5625 | -0.0002 |
| 12 | 3  | 9  | 11 | 4  | 8  | 6414.9920 | -0.0052 |
| 12 | 4  | 9  | 12 | 3  | 10 | 2213.2537 | 0.0028  |
| 12 | 4  | 9  | 11 | 5  | 6  | 4640.9361 | -0.0003 |

|    |    |    |    |    |    |           |         |
|----|----|----|----|----|----|-----------|---------|
| 12 | 4  | 8  | 11 | 5  | 7  | 5600.2760 | -0.0099 |
| 12 | 5  | 8  | 11 | 6  | 5  | 4431.2799 | 0.0001  |
| 12 | 5  | 8  | 12 | 4  | 9  | 2168.8526 | 0.0076  |
| 12 | 5  | 7  | 11 | 6  | 6  | 4642.0995 | 0.0005  |
| 12 | 6  | 7  | 12 | 5  | 8  | 2456.6646 | -0.0003 |
| 12 | 6  | 7  | 11 | 7  | 4  | 3947.5075 | 0.0027  |
| 12 | 6  | 6  | 12 | 5  | 7  | 2274.3836 | -0.0052 |
| 12 | 6  | 6  | 11 | 7  | 5  | 3968.9270 | -0.0050 |
| 12 | 7  | 6  | 12 | 6  | 7  | 2923.0248 | 0.0004  |
| 12 | 7  | 5  | 12 | 6  | 6  | 2903.1399 | -0.0007 |
| 12 | 8  | 5  | 12 | 7  | 6  | 3417.1504 | -0.0005 |
| 12 | 8  | 4  | 12 | 7  | 5  | 3415.9857 | 0.0052  |
| 12 | 10 | 3  | 12 | 9  | 3  | 4378.3962 | 0.0001  |
| 12 | 10 | 3  | 12 | 9  | 4  | 4378.3972 | 0.0001  |
| 12 | 10 | 2  | 12 | 9  | 4  | 4378.3972 | 0.0001  |
| 12 | 10 | 2  | 12 | 9  | 3  | 4378.3962 | 0.0001  |
| 12 | 11 | 2  | 12 | 10 | 2  | 4850.4450 | -0.0006 |
| 12 | 11 | 1  | 12 | 10 | 3  | 4850.4450 | -0.0006 |
| 12 | 12 | 1  | 12 | 11 | 2  | 5319.7926 | 0.0002  |
| 12 | 12 | 0  | 12 | 11 | 1  | 5319.7926 | 0.0002  |
| 13 | 0  | 13 | 12 | 1  | 12 | 6652.1583 | 0.0018  |
| 13 | 0  | 13 | 12 | 0  | 12 | 6652.2226 | 0.0003  |
| 13 | 1  | 13 | 12 | 1  | 12 | 6652.1826 | 0.0003  |
| 13 | 1  | 13 | 12 | 0  | 12 | 6652.2498 | 0.0018  |
| 13 | 1  | 12 | 12 | 2  | 11 | 6908.7384 | -0.0003 |
| 13 | 1  | 12 | 13 | 0  | 13 | 3125.5650 | 0.0057  |
| 13 | 2  | 12 | 12 | 1  | 11 | 6913.1722 | -0.0003 |
| 13 | 2  | 12 | 13 | 1  | 13 | 3126.8773 | -0.0002 |
| 13 | 2  | 11 | 13 | 1  | 12 | 2737.5592 | 0.0003  |
| 13 | 3  | 11 | 13 | 2  | 12 | 2764.0097 | 0.0001  |
| 13 | 3  | 10 | 12 | 4  | 8  | 6245.1263 | 0.0001  |
| 13 | 3  | 10 | 13 | 2  | 11 | 2186.8790 | 0.0007  |
| 13 | 4  | 10 | 13 | 3  | 11 | 2423.2696 | 0.0013  |
| 13 | 4  | 9  | 12 | 5  | 8  | 6437.0949 | 0.0138  |
| 13 | 5  | 9  | 13 | 4  | 10 | 2273.7570 | 0.0001  |
| 13 | 5  | 9  | 12 | 6  | 7  | 5021.8000 | 0.0060  |
| 13 | 6  | 8  | 12 | 7  | 5  | 4560.1339 | 0.0003  |
| 13 | 6  | 8  | 13 | 5  | 9  | 2462.5775 | -0.0001 |
| 13 | 6  | 7  | 12 | 7  | 6  | 4614.3761 | 0.0004  |
| 13 | 6  | 7  | 13 | 5  | 8  | 2131.1180 | 0.0015  |
| 13 | 7  | 7  | 13 | 6  | 8  | 2896.2657 | -0.0008 |
| 13 | 7  | 6  | 13 | 6  | 7  | 2847.1210 | 0.0031  |
| 13 | 7  | 6  | 12 | 8  | 5  | 4044.3429 | 0.0002  |
| 13 | 8  | 6  | 13 | 7  | 7  | 3394.1715 | 0.0016  |
| 13 | 8  | 5  | 13 | 7  | 6  | 3390.4661 | -0.0007 |
| 13 | 9  | 5  | 13 | 8  | 6  | 3885.9634 | -0.0001 |
| 13 | 9  | 4  | 13 | 8  | 5  | 3885.7919 | -0.0001 |
| 13 | 10 | 4  | 13 | 9  | 4  | 4367.3198 | 0.0000  |
| 13 | 10 | 4  | 13 | 9  | 5  | 4367.3250 | 0.0000  |
| 13 | 10 | 3  | 13 | 9  | 4  | 4367.3199 | 0.0000  |
| 13 | 10 | 3  | 13 | 9  | 5  | 4367.3251 | 0.0000  |
| 13 | 11 | 3  | 13 | 10 | 3  | 4842.3829 | -0.0043 |
| 13 | 11 | 2  | 13 | 10 | 4  | 4842.3830 | -0.0043 |
| 13 | 12 | 2  | 13 | 11 | 3  | 5313.7451 | 0.0001  |
| 13 | 12 | 1  | 13 | 11 | 2  | 5313.7451 | 0.0001  |

|    |    |    |    |    |    |           |         |
|----|----|----|----|----|----|-----------|---------|
| 13 | 13 | 1  | 13 | 12 | 2  | 5782.7959 | 0.0000  |
| 13 | 13 | 0  | 13 | 12 | 1  | 5782.7959 | 0.0000  |
| 14 | 1  | 13 | 14 | 0  | 14 | 3384.3260 | 0.0024  |
| 14 | 2  | 13 | 14 | 1  | 14 | 3384.8870 | -0.0001 |
| 14 | 2  | 12 | 14 | 1  | 13 | 3008.6608 | -0.0001 |
| 14 | 3  | 12 | 14 | 2  | 13 | 3021.4676 | -0.0002 |
| 14 | 3  | 11 | 13 | 4  | 9  | 6514.7431 | 0.0000  |
| 14 | 4  | 11 | 13 | 5  | 8  | 5242.3888 | -0.0002 |
| 14 | 4  | 11 | 14 | 3  | 12 | 2654.5233 | 0.0016  |
| 14 | 5  | 10 | 14 | 4  | 11 | 2415.7710 | -0.0039 |
| 14 | 6  | 9  | 14 | 5  | 10 | 2492.3733 | 0.0003  |
| 14 | 7  | 8  | 13 | 8  | 5  | 4652.9494 | 0.0003  |
| 14 | 7  | 8  | 14 | 6  | 9  | 2871.1125 | -0.0010 |
| 14 | 7  | 7  | 13 | 8  | 6  | 4664.1572 | 0.0004  |
| 14 | 8  | 7  | 14 | 7  | 8  | 3366.2290 | 0.0083  |
| 14 | 8  | 6  | 14 | 7  | 7  | 3355.8128 | -0.0038 |
| 14 | 9  | 6  | 14 | 8  | 7  | 3866.0223 | -0.0001 |
| 14 | 9  | 5  | 14 | 8  | 6  | 3865.4190 | -0.0001 |
| 14 | 10 | 5  | 14 | 9  | 6  | 4353.3668 | 0.0000  |
| 14 | 10 | 5  | 14 | 9  | 5  | 4353.3432 | 0.0000  |
| 14 | 10 | 4  | 14 | 9  | 5  | 4353.3438 | 0.0000  |
| 14 | 10 | 4  | 14 | 9  | 6  | 4353.3674 | 0.0000  |
| 14 | 11 | 4  | 14 | 10 | 4  | 4832.2524 | -0.0019 |
| 14 | 11 | 3  | 14 | 10 | 5  | 4832.2531 | -0.0019 |
| 14 | 12 | 3  | 14 | 11 | 3  | 5306.1499 | 0.0001  |
| 14 | 12 | 3  | 14 | 11 | 4  | 5306.1499 | 0.0001  |
| 14 | 12 | 2  | 14 | 11 | 4  | 5306.1499 | 0.0001  |
| 14 | 12 | 2  | 14 | 11 | 3  | 5306.1499 | 0.0001  |
| 14 | 13 | 2  | 14 | 12 | 3  | 5776.9596 | 0.0000  |
| 14 | 13 | 1  | 14 | 12 | 2  | 5776.9596 | 0.0000  |
| 15 | 1  | 14 | 15 | 0  | 15 | 3642.5992 | -0.0002 |
| 15 | 2  | 14 | 15 | 1  | 15 | 3642.8362 | -0.0002 |
| 15 | 2  | 13 | 15 | 1  | 14 | 3274.7445 | 0.0003  |
| 15 | 3  | 13 | 15 | 2  | 14 | 3280.7531 | 0.0003  |
| 15 | 3  | 12 | 15 | 2  | 13 | 2822.8969 | 0.0015  |
| 15 | 4  | 12 | 15 | 3  | 13 | 2900.3588 | 0.0008  |
| 15 | 6  | 10 | 15 | 5  | 11 | 2553.5592 | 0.0011  |
| 15 | 7  | 9  | 15 | 6  | 10 | 2853.6029 | -0.0011 |
| 15 | 7  | 9  | 14 | 8  | 6  | 5272.4435 | 0.0007  |
| 15 | 7  | 8  | 14 | 8  | 7  | 5301.3895 | 0.0008  |
| 15 | 8  | 8  | 15 | 7  | 9  | 3333.9410 | -0.0011 |
| 15 | 8  | 7  | 15 | 7  | 8  | 3307.5978 | -0.0013 |
| 15 | 9  | 7  | 15 | 8  | 8  | 3841.3256 | -0.0002 |
| 15 | 9  | 6  | 15 | 8  | 7  | 3839.4414 | -0.0002 |
| 15 | 10 | 6  | 15 | 9  | 7  | 4336.0067 | 0.0000  |
| 15 | 10 | 5  | 15 | 9  | 6  | 4335.9178 | 0.0000  |
| 15 | 11 | 5  | 15 | 10 | 5  | 4819.6930 | 0.0038  |
| 15 | 11 | 4  | 15 | 10 | 6  | 4819.6930 | 0.0008  |
| 15 | 12 | 4  | 15 | 11 | 4  | 5296.7506 | 0.0001  |
| 15 | 12 | 4  | 15 | 11 | 5  | 5296.7507 | 0.0001  |
| 15 | 12 | 3  | 15 | 11 | 5  | 5296.7507 | 0.0001  |
| 15 | 12 | 3  | 15 | 11 | 4  | 5296.7506 | 0.0001  |
| 15 | 13 | 3  | 15 | 12 | 4  | 5769.7420 | 0.0000  |
| 15 | 13 | 2  | 15 | 12 | 3  | 5769.7420 | 0.0000  |
| 15 | 14 | 2  | 15 | 13 | 3  | 6240.1031 | 0.0000  |

|    |    |    |    |    |    |           |         |
|----|----|----|----|----|----|-----------|---------|
| 15 | 14 | 1  | 15 | 13 | 2  | 6240.1031 | 0.0000  |
| 16 | 2  | 14 | 16 | 1  | 15 | 3537.9230 | 0.0112  |
| 16 | 3  | 14 | 16 | 2  | 15 | 3540.6460 | -0.0141 |
| 16 | 3  | 13 | 16 | 2  | 14 | 3114.5781 | 0.0012  |
| 16 | 5  | 12 | 16 | 4  | 13 | 2799.4510 | -0.0059 |
| 16 | 6  | 11 | 16 | 5  | 12 | 2651.2206 | 0.0019  |
| 16 | 7  | 10 | 16 | 6  | 11 | 2851.5677 | -0.0011 |
| 16 | 8  | 9  | 16 | 7  | 10 | 3299.3553 | -0.0014 |
| 16 | 8  | 8  | 16 | 7  | 9  | 3238.7410 | -0.0025 |
| 16 | 9  | 8  | 16 | 8  | 9  | 3811.3998 | -0.0002 |
| 16 | 9  | 7  | 16 | 8  | 8  | 3806.0920 | 0.0058  |
| 16 | 10 | 7  | 16 | 9  | 8  | 4314.6713 | -0.0001 |
| 16 | 10 | 6  | 16 | 9  | 7  | 4314.3666 | -0.0001 |
| 16 | 11 | 6  | 16 | 10 | 6  | 4804.2833 | -0.0013 |
| 16 | 11 | 5  | 16 | 10 | 7  | 4804.2962 | -0.0013 |
| 16 | 12 | 5  | 16 | 11 | 6  | 5285.2629 | 0.0000  |
| 16 | 12 | 5  | 16 | 11 | 5  | 5285.2626 | 0.0000  |
| 16 | 12 | 4  | 16 | 11 | 5  | 5285.2626 | 0.0000  |
| 16 | 12 | 4  | 16 | 11 | 6  | 5285.2629 | 0.0000  |
| 16 | 13 | 4  | 16 | 12 | 5  | 5760.9318 | 0.0000  |
| 16 | 13 | 3  | 16 | 12 | 4  | 5760.9317 | 0.0000  |
| 16 | 14 | 3  | 16 | 13 | 4  | 6233.2009 | 0.0000  |
| 16 | 14 | 2  | 16 | 13 | 3  | 6233.2009 | 0.0000  |
| 17 | 2  | 15 | 17 | 1  | 16 | 3799.3649 | 0.0002  |
| 17 | 3  | 15 | 17 | 2  | 16 | 3800.5957 | 0.0002  |
| 17 | 7  | 11 | 17 | 6  | 12 | 2873.5277 | -0.0008 |
| 17 | 9  | 9  | 17 | 8  | 10 | 3776.1871 | -0.0005 |
| 17 | 9  | 8  | 17 | 8  | 9  | 3762.4984 | -0.0006 |
| 17 | 10 | 8  | 17 | 9  | 9  | 4288.7520 | -0.0001 |
| 17 | 10 | 7  | 17 | 9  | 8  | 4287.8097 | -0.0001 |
| 17 | 12 | 6  | 17 | 11 | 6  | 5271.3678 | 0.0000  |
| 17 | 12 | 6  | 17 | 11 | 7  | 5271.3694 | 0.0000  |
| 17 | 12 | 5  | 17 | 11 | 7  | 5271.3695 | 0.0000  |
| 17 | 12 | 5  | 17 | 11 | 6  | 5271.3679 | 0.0000  |
| 17 | 13 | 5  | 17 | 12 | 6  | 5750.2966 | 0.0000  |
| 17 | 13 | 4  | 17 | 12 | 5  | 5750.2966 | 0.0000  |
| 18 | 1  | 17 | 18 | 0  | 18 | 4415.9258 | -0.0005 |
| 18 | 2  | 17 | 18 | 1  | 18 | 4415.9422 | -0.0005 |
| 18 | 7  | 12 | 18 | 6  | 13 | 2927.1828 | -0.0001 |
| 18 | 8  | 11 | 18 | 7  | 12 | 3241.1410 | 0.0031  |
| 18 | 10 | 8  | 18 | 9  | 9  | 4255.0059 | -0.0002 |
| 19 | 2  | 17 | 19 | 1  | 18 | 4319.4691 | -0.0001 |
| 19 | 3  | 17 | 19 | 2  | 18 | 4319.7037 | -0.0001 |
| 19 | 6  | 14 | 19 | 5  | 15 | 3163.3117 | 0.0021  |
| 19 | 9  | 11 | 19 | 8  | 12 | 3694.3740 | 0.0048  |
| 20 | 2  | 18 | 20 | 1  | 19 | 4578.6864 | -0.0003 |
| 20 | 3  | 18 | 20 | 2  | 19 | 4578.7867 | -0.0003 |
| 20 | 8  | 13 | 20 | 7  | 14 | 3245.7512 | -0.0011 |

**Table S9.** Experimental transition frequencies of the observed parent species of conformer **V** of the TFB dimer.

| $J'$ | $Ka'$ | $Kc'$ | $J''$ | $Ka''$ | $Kc''$ | $\nu_{\text{obs}}/\text{MHz}$ | $\Delta\nu_{\text{obs-cal}}/\text{MHz}$ |
|------|-------|-------|-------|--------|--------|-------------------------------|-----------------------------------------|
| 2    | 2     | 1     | 1     | 1      | 0      | 2097.4863                     | 0.0000                                  |
| 2    | 2     | 0     | 1     | 1      | 1      | 2151.5647                     | 0.0000                                  |
| 3    | 2     | 2     | 2     | 1      | 1      | 2483.1742                     | 0.0000                                  |
| 3    | 2     | 1     | 2     | 1      | 2      | 2654.0224                     | 0.0000                                  |
| 3    | 3     | 1     | 2     | 2      | 0      | 3390.2822                     | -0.0066                                 |
| 3    | 3     | 0     | 2     | 2      | 1      | 3394.9500                     | -0.0070                                 |
| 4    | 0     | 4     | 3     | 0      | 3      | 1699.1366                     | -0.0002                                 |
| 4    | 1     | 4     | 3     | 0      | 3      | 1921.3874                     | 0.0000                                  |
| 4    | 1     | 4     | 3     | 1      | 3      | 1633.9247                     | 0.0003                                  |
| 4    | 1     | 3     | 3     | 1      | 2      | 1831.0715                     | -0.0019                                 |
| 4    | 2     | 3     | 3     | 2      | 2      | 1737.9374                     | -0.0010                                 |
| 4    | 2     | 3     | 3     | 1      | 2      | 2843.4826                     | 0.0000                                  |
| 4    | 3     | 2     | 3     | 2      | 1      | 3816.3210                     | -0.0003                                 |
| 4    | 3     | 2     | 4     | 2      | 3      | 2100.2595                     | 0.0000                                  |
| 4    | 3     | 1     | 3     | 2      | 2      | 3839.9207                     | 0.0003                                  |
| 4    | 4     | 1     | 4     | 3      | 2      | 2913.0474                     | 0.0000                                  |
| 4    | 4     | 1     | 3     | 3      | 0      | 4662.3309                     | 0.0008                                  |
| 4    | 4     | 0     | 3     | 3      | 1      | 4662.5895                     | 0.0008                                  |
| 4    | 4     | 0     | 4     | 7      | 1      | 2911.3364                     | 0.0000                                  |
| 5    | 0     | 5     | 4     | 1      | 4      | 1874.9748                     | 0.0000                                  |
| 5    | 0     | 5     | 4     | 0      | 4      | 2097.2256                     | 0.0003                                  |
| 5    | 1     | 5     | 4     | 0      | 4      | 2257.9051                     | 0.0000                                  |
| 5    | 1     | 5     | 4     | 1      | 4      | 2035.6550                     | 0.0005                                  |
| 5    | 1     | 4     | 4     | 1      | 3      | 2278.8220                     | -0.0018                                 |
| 5    | 2     | 4     | 4     | 2      | 3      | 2166.9025                     | -0.0010                                 |
| 5    | 2     | 4     | 4     | 1      | 3      | 3179.3127                     | 0.0000                                  |
| 5    | 2     | 3     | 4     | 2      | 2      | 2246.3055                     | -0.0021                                 |
| 5    | 2     | 3     | 4     | 1      | 4      | 3817.6726                     | 0.0002                                  |
| 5    | 3     | 3     | 5     | 2      | 4      | 2122.8446                     | 0.0000                                  |
| 5    | 3     | 3     | 4     | 3      | 2      | 2189.4873                     | -0.0013                                 |
| 5    | 3     | 3     | 4     | 2      | 2      | 4225.6364                     | 0.0005                                  |
| 5    | 3     | 2     | 4     | 3      | 1      | 2194.5935                     | -0.0015                                 |
| 5    | 3     | 2     | 4     | 2      | 3      | 4296.5775                     | 0.0005                                  |
| 5    | 4     | 2     | 5     | 3      | 3      | 2910.0934                     | 0.0000                                  |
| 5    | 4     | 2     | 4     | 4      | 1      | 2186.5333                     | -0.0013                                 |
| 5    | 4     | 2     | 4     | 3      | 1      | 5097.8684                     | 0.0089                                  |
| 5    | 4     | 1     | 5     | 3      | 2      | 2903.3672                     | 0.0000                                  |
| 5    | 4     | 1     | 4     | 4      | 0      | 2186.6246                     | -0.0013                                 |
| 5    | 4     | 1     | 4     | 3      | 2      | 5099.6937                     | 0.0089                                  |
| 5    | 5     | 1     | 4     | 4      | 0      | 5932.1768                     | 0.0011                                  |
| 5    | 5     | 0     | 4     | 4      | 1      | 5932.1888                     | 0.0011                                  |
| 6    | 0     | 6     | 5     | 1      | 5      | 2324.6354                     | 0.0000                                  |
| 6    | 0     | 6     | 5     | 0      | 5      | 2485.3157                     | 0.0007                                  |
| 6    | 1     | 6     | 5     | 1      | 5      | 2434.0070                     | 0.0007                                  |
| 6    | 1     | 6     | 5     | 0      | 5      | 2594.6860                     | 0.0000                                  |
| 6    | 1     | 5     | 5     | 1      | 4      | 2718.5900                     | 0.0012                                  |
| 6    | 2     | 5     | 5     | 2      | 4      | 2592.2683                     | -0.0010                                 |
| 6    | 2     | 5     | 5     | 1      | 4      | 3492.7583                     | 0.0002                                  |
| 6    | 2     | 4     | 5     | 2      | 3      | 2718.5960                     | -0.0012                                 |
| 6    | 2     | 4     | 5     | 1      | 5      | 4500.6154                     | 0.0002                                  |
| 6    | 3     | 4     | 6     | 2      | 5      | 2160.6180                     | 0.0000                                  |
| 6    | 3     | 4     | 5     | 2      | 3      | 4609.3642                     | -0.0068                                 |

|   |   |   |   |   |   |           |         |
|---|---|---|---|---|---|-----------|---------|
| 6 | 3 | 4 | 5 | 3 | 3 | 2630.0455 | 0.0028  |
| 6 | 3 | 3 | 5 | 3 | 2 | 2643.3793 | -0.0017 |
| 6 | 3 | 3 | 5 | 2 | 4 | 4773.0511 | -0.0034 |
| 6 | 4 | 3 | 6 | 3 | 4 | 2907.0012 | 0.0000  |
| 6 | 4 | 3 | 5 | 4 | 2 | 2626.9491 | -0.0014 |
| 6 | 4 | 3 | 5 | 3 | 2 | 5530.2247 | 0.0097  |
| 6 | 4 | 2 | 5 | 3 | 3 | 5537.5627 | 0.0075  |
| 6 | 4 | 2 | 5 | 4 | 1 | 2627.3575 | -0.0015 |
| 6 | 4 | 2 | 6 | 3 | 3 | 2887.3452 | 0.0000  |
| 6 | 5 | 2 | 5 | 5 | 1 | 2623.1341 | -0.0014 |
| 6 | 5 | 2 | 5 | 4 | 1 | 6368.6863 | 0.0009  |
| 6 | 5 | 1 | 5 | 4 | 2 | 6368.7943 | 0.0009  |
| 6 | 5 | 1 | 5 | 5 | 0 | 2623.1389 | -0.0014 |
| 7 | 0 | 7 | 6 | 1 | 6 | 2758.3750 | 0.0000  |
| 7 | 0 | 7 | 6 | 0 | 6 | 2867.7468 | 0.0009  |
| 7 | 1 | 7 | 6 | 1 | 6 | 2829.2016 | 0.0008  |
| 7 | 1 | 7 | 6 | 0 | 6 | 2938.5718 | 0.0000  |
| 7 | 1 | 6 | 6 | 1 | 5 | 3147.7790 | 0.0001  |
| 7 | 2 | 6 | 6 | 2 | 5 | 3013.4627 | 0.0053  |
| 7 | 2 | 6 | 6 | 1 | 5 | 3787.6269 | 0.0002  |
| 7 | 2 | 5 | 6 | 1 | 6 | 5258.3476 | 0.0004  |
| 7 | 2 | 5 | 6 | 2 | 4 | 3191.7376 | -0.0007 |
| 7 | 3 | 5 | 7 | 2 | 6 | 2217.5771 | 0.0000  |
| 7 | 3 | 5 | 6 | 3 | 4 | 3070.4143 | -0.0021 |
| 7 | 3 | 5 | 6 | 2 | 4 | 4961.1878 | -0.0024 |
| 7 | 3 | 4 | 6 | 2 | 5 | 5280.1631 | -0.0060 |
| 7 | 3 | 4 | 6 | 3 | 3 | 3099.3811 | -0.0027 |
| 7 | 4 | 4 | 6 | 4 | 3 | 3068.8726 | 0.0049  |
| 7 | 4 | 4 | 7 | 3 | 5 | 2905.4524 | 0.0000  |
| 7 | 4 | 4 | 6 | 3 | 3 | 5955.7029 | 0.0013  |
| 7 | 4 | 3 | 7 | 3 | 4 | 2858.1769 | 0.0000  |
| 7 | 4 | 3 | 6 | 3 | 4 | 5977.7291 | 0.0012  |
| 7 | 4 | 3 | 6 | 4 | 2 | 3070.2136 | -0.0019 |
| 7 | 5 | 3 | 6 | 5 | 2 | 3063.1065 | -0.0015 |
| 7 | 5 | 3 | 6 | 4 | 2 | 6804.4372 | 0.0028  |
| 7 | 5 | 2 | 6 | 4 | 3 | 6804.9800 | 0.0028  |
| 7 | 5 | 2 | 6 | 5 | 1 | 3063.1327 | -0.0015 |
| 7 | 6 | 2 | 6 | 6 | 1 | 3059.7821 | -0.0042 |
| 7 | 6 | 1 | 6 | 6 | 0 | 3059.7821 | -0.0044 |
| 8 | 0 | 8 | 7 | 0 | 7 | 3248.3929 | -0.0028 |
| 8 | 0 | 8 | 7 | 1 | 7 | 3177.5698 | 0.0000  |
| 8 | 1 | 8 | 7 | 1 | 7 | 3221.6789 | -0.0025 |
| 8 | 1 | 8 | 7 | 0 | 7 | 3292.5073 | 0.0000  |
| 8 | 1 | 7 | 7 | 2 | 6 | 2924.1994 | 0.0000  |
| 8 | 1 | 7 | 7 | 1 | 6 | 3564.0453 | -0.0020 |
| 8 | 2 | 7 | 8 | 1 | 8 | 2189.3720 | 0.0000  |
| 8 | 2 | 7 | 7 | 2 | 6 | 3430.0316 | -0.0007 |
| 8 | 2 | 7 | 7 | 1 | 6 | 4069.8760 | -0.0041 |
| 8 | 2 | 6 | 7 | 2 | 5 | 3660.6746 | -0.0018 |
| 8 | 3 | 6 | 7 | 3 | 5 | 3509.6164 | -0.0017 |
| 8 | 3 | 6 | 7 | 2 | 5 | 5279.0625 | -0.0075 |
| 8 | 3 | 5 | 7 | 2 | 6 | 5831.0690 | -0.0048 |
| 8 | 3 | 5 | 7 | 3 | 4 | 3564.3605 | -0.0016 |
| 8 | 4 | 5 | 8 | 3 | 6 | 2908.1078 | 0.0000  |
| 8 | 4 | 5 | 7 | 4 | 4 | 3512.2718 | -0.0016 |

|    |   |    |    |   |    |           |         |
|----|---|----|----|---|----|-----------|---------|
| 8  | 4 | 5  | 7  | 3 | 4  | 6368.5924 | 0.0011  |
| 8  | 4 | 4  | 7  | 3 | 5  | 6423.2346 | 0.0010  |
| 8  | 4 | 4  | 7  | 4 | 3  | 3515.9241 | 0.0020  |
| 8  | 5 | 4  | 7  | 5 | 3  | 3504.3541 | -0.0014 |
| 8  | 5 | 3  | 7  | 5 | 2  | 3504.4582 | -0.0014 |
| 8  | 6 | 3  | 7  | 6 | 2  | 3499.4123 | -0.0014 |
| 8  | 6 | 2  | 7  | 6 | 1  | 3499.4138 | -0.0014 |
| 8  | 7 | 2  | 7  | 7 | 1  | 3496.4728 | -0.0014 |
| 8  | 7 | 1  | 7  | 7 | 0  | 3496.4729 | -0.0014 |
| 9  | 0 | 9  | 8  | 1 | 8  | 3585.3312 | 0.0000  |
| 9  | 0 | 9  | 8  | 0 | 8  | 3629.4416 | -0.0013 |
| 9  | 1 | 9  | 8  | 0 | 8  | 3656.1089 | 0.0000  |
| 9  | 1 | 9  | 8  | 1 | 8  | 3612.0007 | 0.0033  |
| 9  | 1 | 8  | 8  | 1 | 7  | 3966.3278 | -0.0001 |
| 9  | 1 | 8  | 8  | 2 | 7  | 3460.4949 | -0.0001 |
| 9  | 2 | 8  | 9  | 1 | 9  | 2419.1317 | 0.0000  |
| 9  | 2 | 8  | 8  | 2 | 7  | 3841.7571 | 0.0000  |
| 9  | 2 | 8  | 8  | 1 | 7  | 4347.5902 | 0.0003  |
| 9  | 2 | 7  | 8  | 2 | 6  | 4121.7503 | 0.0015  |
| 9  | 3 | 7  | 9  | 2 | 8  | 2401.9732 | 0.0000  |
| 9  | 3 | 7  | 8  | 2 | 6  | 5564.9528 | -0.0082 |
| 9  | 3 | 7  | 8  | 3 | 6  | 3946.5686 | 0.0013  |
| 9  | 3 | 6  | 8  | 2 | 7  | 6439.7959 | 0.0008  |
| 9  | 3 | 6  | 8  | 3 | 5  | 4038.7536 | 0.0001  |
| 9  | 4 | 6  | 8  | 4 | 5  | 3956.9540 | -0.0009 |
| 9  | 4 | 6  | 9  | 3 | 7  | 2918.4953 | 0.0000  |
| 9  | 4 | 6  | 8  | 3 | 5  | 6761.1852 | 0.0011  |
| 9  | 4 | 5  | 9  | 3 | 6  | 2736.4917 | 0.0000  |
| 9  | 4 | 5  | 8  | 4 | 4  | 3965.5080 | -0.0004 |
| 9  | 4 | 5  | 8  | 3 | 6  | 6879.1250 | 0.0012  |
| 9  | 5 | 5  | 8  | 5 | 4  | 3947.0350 | 0.0001  |
| 9  | 5 | 4  | 8  | 5 | 3  | 3947.3702 | 0.0001  |
| 9  | 6 | 4  | 8  | 6 | 3  | 3940.0530 | 0.0004  |
| 9  | 6 | 3  | 8  | 6 | 2  | 3940.0598 | 0.0004  |
| 9  | 7 | 3  | 8  | 7 | 2  | 3935.8631 | 0.0005  |
| 9  | 7 | 2  | 8  | 7 | 1  | 3935.8631 | 0.0005  |
| 9  | 8 | 2  | 8  | 8 | 1  | 3933.1700 | -0.0084 |
| 9  | 8 | 1  | 8  | 8 | 0  | 3933.1700 | -0.0084 |
| 10 | 0 | 10 | 9  | 0 | 9  | 4011.6111 | 0.0016  |
| 10 | 0 | 10 | 9  | 1 | 9  | 3984.9434 | 0.0000  |
| 10 | 1 | 10 | 9  | 0 | 9  | 4027.3600 | -0.0035 |
| 10 | 1 | 10 | 9  | 1 | 9  | 4000.6976 | 0.0001  |
| 10 | 1 | 9  | 9  | 2 | 8  | 3974.6521 | -0.0002 |
| 10 | 1 | 9  | 9  | 1 | 8  | 4355.9161 | 0.0018  |
| 10 | 2 | 9  | 9  | 2 | 8  | 4248.6351 | 0.0002  |
| 10 | 2 | 9  | 10 | 1 | 10 | 2667.0691 | 0.0000  |
| 10 | 2 | 9  | 9  | 1 | 8  | 4629.8972 | 0.0003  |
| 10 | 2 | 8  | 9  | 3 | 7  | 3129.1644 | 0.0000  |
| 10 | 2 | 8  | 9  | 2 | 7  | 4572.3779 | 0.0013  |
| 10 | 3 | 8  | 10 | 2 | 9  | 2533.5588 | 0.0000  |
| 10 | 3 | 8  | 9  | 2 | 7  | 5823.4259 | -0.0067 |
| 10 | 3 | 8  | 9  | 3 | 7  | 4380.2240 | 0.0036  |
| 10 | 3 | 7  | 9  | 3 | 6  | 4520.5633 | 0.0009  |
| 10 | 4 | 7  | 10 | 3 | 8  | 2940.7316 | 0.0000  |
| 10 | 4 | 7  | 9  | 4 | 6  | 4402.4584 | 0.0017  |

|    |    |    |    |    |    |           |         |
|----|----|----|----|----|----|-----------|---------|
| 10 | 4  | 6  | 9  | 4  | 5  | 4420.3710 | 0.0017  |
| 10 | 5  | 6  | 9  | 5  | 5  | 4391.2677 | 0.0028  |
| 10 | 5  | 5  | 9  | 5  | 4  | 4392.1936 | 0.0027  |
| 10 | 6  | 5  | 9  | 6  | 4  | 4381.8330 | -0.0008 |
| 10 | 6  | 4  | 9  | 6  | 3  | 4381.8608 | 0.0017  |
| 10 | 7  | 4  | 9  | 7  | 3  | 4376.0793 | 0.0022  |
| 10 | 7  | 3  | 9  | 7  | 2  | 4376.0797 | 0.0022  |
| 10 | 8  | 3  | 9  | 8  | 2  | 4372.3928 | 0.0009  |
| 10 | 8  | 2  | 9  | 8  | 1  | 4372.3928 | 0.0009  |
| 10 | 9  | 2  | 9  | 9  | 1  | 4369.8871 | 0.0003  |
| 10 | 9  | 1  | 9  | 9  | 0  | 4369.8871 | 0.0003  |
| 11 | 0  | 11 | 10 | 1  | 10 | 4379.1183 | 0.0000  |
| 11 | 0  | 11 | 10 | 0  | 10 | 4394.8758 | 0.0034  |
| 11 | 1  | 11 | 10 | 1  | 10 | 4388.2621 | 0.0027  |
| 11 | 1  | 11 | 10 | 0  | 10 | 4404.0134 | 0.0000  |
| 11 | 1  | 10 | 10 | 2  | 9  | 4462.5312 | -0.0002 |
| 11 | 1  | 10 | 11 | 0  | 11 | 2750.4821 | 0.0000  |
| 11 | 1  | 10 | 10 | 1  | 9  | 4736.5209 | 0.0069  |
| 11 | 2  | 10 | 11 | 1  | 11 | 2929.7296 | 0.0000  |
| 11 | 2  | 10 | 10 | 1  | 9  | 4924.9026 | 0.0002  |
| 11 | 2  | 10 | 10 | 2  | 9  | 4650.9249 | 0.0051  |
| 11 | 2  | 9  | 10 | 2  | 8  | 5010.4133 | 0.0069  |
| 11 | 2  | 9  | 10 | 3  | 8  | 3759.3520 | 0.0016  |
| 11 | 3  | 9  | 11 | 2  | 10 | 2692.3100 | 0.0000  |
| 11 | 3  | 9  | 10 | 3  | 8  | 4809.6740 | 0.0030  |
| 11 | 3  | 9  | 10 | 2  | 8  | 6060.7248 | -0.0022 |
| 11 | 3  | 8  | 10 | 3  | 7  | 5005.2541 | -0.0009 |
| 11 | 4  | 8  | 11 | 3  | 9  | 2979.1329 | 0.0000  |
| 11 | 4  | 8  | 10 | 4  | 7  | 4848.0745 | 0.0022  |
| 11 | 4  | 7  | 11 | 3  | 8  | 2513.2478 | 0.0000  |
| 11 | 4  | 7  | 10 | 4  | 6  | 4882.2051 | 0.0008  |
| 11 | 5  | 7  | 10 | 5  | 6  | 4837.0938 | -0.0022 |
| 11 | 5  | 6  | 10 | 5  | 5  | 4839.3680 | -0.0007 |
| 11 | 6  | 6  | 10 | 6  | 5  | 4824.8891 | 0.0015  |
| 11 | 6  | 5  | 10 | 6  | 4  | 4824.9694 | 0.0015  |
| 11 | 7  | 5  | 10 | 7  | 4  | 4817.2157 | 0.0015  |
| 11 | 7  | 4  | 10 | 7  | 3  | 4817.2174 | 0.0015  |
| 11 | 8  | 4  | 10 | 8  | 3  | 4812.3003 | -0.0008 |
| 11 | 8  | 3  | 10 | 8  | 2  | 4812.3003 | -0.0009 |
| 11 | 9  | 3  | 10 | 9  | 2  | 4808.9723 | 0.0069  |
| 11 | 9  | 2  | 10 | 9  | 1  | 4808.9723 | 0.0069  |
| 11 | 10 | 2  | 10 | 10 | 1  | 4806.5947 | 0.0027  |
| 11 | 10 | 1  | 10 | 10 | 0  | 4806.5947 | 0.0027  |
| 12 | 0  | 12 | 11 | 0  | 11 | 4778.9731 | 0.0018  |
| 12 | 0  | 12 | 11 | 1  | 11 | 4769.8369 | 0.0066  |
| 12 | 1  | 12 | 11 | 0  | 11 | 4784.1989 | 0.0000  |
| 12 | 1  | 12 | 11 | 1  | 11 | 4775.0610 | 0.0031  |
| 12 | 1  | 11 | 11 | 1  | 10 | 5112.7880 | 0.0022  |
| 12 | 1  | 11 | 12 | 0  | 12 | 3084.2967 | 0.0000  |
| 12 | 1  | 11 | 11 | 2  | 10 | 4924.3971 | -0.0003 |
| 12 | 2  | 11 | 11 | 2  | 10 | 5049.0868 | -0.0002 |
| 12 | 2  | 11 | 11 | 1  | 10 | 5237.4746 | -0.0008 |
| 12 | 2  | 10 | 11 | 3  | 9  | 4383.6079 | -0.0004 |
| 12 | 2  | 10 | 11 | 2  | 9  | 5433.9260 | -0.0029 |
| 12 | 2  | 10 | 12 | 1  | 11 | 2151.5208 | 0.0000  |



|    |    |    |    |    |    |           |         |
|----|----|----|----|----|----|-----------|---------|
| 12 | 3  | 10 | 11 | 3  | 9  | 5234.2217 | 0.0009  |
| 12 | 3  | 10 | 11 | 2  | 9  | 6284.5424 | 0.0010  |
| 12 | 3  | 9  | 11 | 3  | 8  | 5487.1563 | 0.0025  |
| 12 | 4  | 9  | 12 | 3  | 10 | 3037.7897 | 0.0000  |
| 12 | 4  | 9  | 11 | 4  | 8  | 5292.8759 | -0.0017 |
| 12 | 4  | 8  | 11 | 4  | 7  | 5352.6771 | -0.0024 |
| 12 | 5  | 8  | 11 | 5  | 7  | 5284.4681 | -0.0022 |
| 12 | 5  | 7  | 11 | 5  | 6  | 5289.5388 | 0.0006  |
| 12 | 6  | 7  | 11 | 6  | 6  | 5269.3375 | -0.0019 |
| 12 | 6  | 6  | 11 | 6  | 5  | 5269.5656 | 0.0016  |
| 12 | 7  | 6  | 11 | 7  | 5  | 5259.3744 | 0.0019  |
| 12 | 7  | 5  | 11 | 7  | 4  | 5259.3803 | 0.0019  |
| 12 | 8  | 5  | 11 | 8  | 4  | 5252.9735 | -0.0049 |
| 12 | 8  | 4  | 11 | 8  | 3  | 5252.9735 | -0.0050 |
| 12 | 9  | 4  | 11 | 9  | 3  | 5248.6395 | -0.0036 |
| 12 | 9  | 3  | 11 | 9  | 2  | 5248.6395 | -0.0036 |
| 12 | 10 | 3  | 11 | 10 | 2  | 5245.5618 | 0.0002  |
| 12 | 10 | 2  | 11 | 10 | 1  | 5245.5618 | 0.0002  |
| 12 | 11 | 1  | 11 | 11 | 0  | 5243.2889 | 0.0000  |
| 12 | 11 | 2  | 11 | 11 | 1  | 5243.2889 | 0.0000  |
| 13 | 0  | 13 | 12 | 0  | 12 | 5163.6344 | -0.0039 |
| 13 | 0  | 13 | 12 | 1  | 12 | 5158.4087 | -0.0020 |
| 13 | 1  | 13 | 12 | 0  | 12 | 5166.5925 | 0.0000  |
| 13 | 1  | 13 | 12 | 1  | 12 | 5161.3622 | -0.0027 |
| 13 | 1  | 12 | 13 | 0  | 13 | 3409.1378 | 0.0001  |
| 13 | 1  | 12 | 12 | 1  | 11 | 5488.4781 | -0.0012 |
| 13 | 2  | 12 | 12 | 1  | 11 | 5568.4505 | -0.0028 |
| 13 | 2  | 12 | 12 | 2  | 11 | 5443.7609 | -0.0028 |
| 13 | 2  | 12 | 13 | 1  | 13 | 3486.1577 | 0.0002  |
| 13 | 2  | 11 | 12 | 3  | 10 | 4991.1777 | -0.0001 |
| 13 | 2  | 11 | 12 | 2  | 10 | 5841.7939 | 0.0035  |
| 13 | 3  | 11 | 12 | 2  | 10 | 6504.0377 | 0.0010  |
| 13 | 3  | 11 | 12 | 3  | 10 | 5653.4260 | 0.0018  |
| 13 | 3  | 11 | 13 | 2  | 12 | 3087.1042 | 0.0000  |
| 13 | 3  | 10 | 12 | 4  | 9  | 3708.3521 | -0.0002 |
| 13 | 3  | 10 | 12 | 3  | 9  | 5961.2192 | 0.0010  |
| 13 | 4  | 10 | 12 | 4  | 9  | 5735.8038 | -0.0047 |
| 13 | 4  | 10 | 13 | 3  | 11 | 3120.1741 | 0.0000  |
| 13 | 4  | 9  | 12 | 4  | 8  | 5832.6668 | -0.0018 |
| 13 | 4  | 9  | 13 | 3  | 10 | 2250.2239 | 0.0000  |
| 13 | 5  | 9  | 12 | 5  | 8  | 5733.1767 | 0.0008  |
| 13 | 5  | 8  | 12 | 5  | 7  | 5743.5924 | -0.0067 |
| 13 | 6  | 8  | 12 | 6  | 7  | 5715.3005 | 0.0006  |
| 13 | 6  | 7  | 12 | 6  | 6  | 5715.8687 | 0.0005  |
| 13 | 7  | 7  | 12 | 7  | 6  | 5702.6497 | -0.0039 |
| 13 | 7  | 6  | 12 | 7  | 5  | 5702.6674 | -0.0049 |
| 13 | 8  | 6  | 12 | 8  | 5  | 5694.4988 | 0.0009  |
| 13 | 8  | 5  | 12 | 8  | 4  | 5694.4992 | 0.0009  |
| 13 | 9  | 5  | 12 | 9  | 4  | 5688.9771 | 0.0008  |
| 13 | 9  | 4  | 12 | 9  | 3  | 5688.9771 | 0.0008  |
| 13 | 10 | 4  | 12 | 10 | 3  | 5685.0569 | 0.0007  |
| 13 | 10 | 3  | 12 | 10 | 2  | 5685.0570 | 0.0008  |
| 13 | 11 | 3  | 12 | 11 | 2  | 5682.1678 | 0.0005  |
| 13 | 11 | 2  | 12 | 11 | 1  | 5682.1678 | 0.0005  |
| 13 | 12 | 2  | 12 | 12 | 1  | 5679.9742 | 0.0004  |

|    |    |    |    |    |    |           |         |
|----|----|----|----|----|----|-----------|---------|
| 13 | 12 | 1  | 12 | 12 | 0  | 5679.9742 | 0.0004  |
| 14 | 0  | 14 | 13 | 0  | 13 | 5548.6674 | 0.0006  |
| 14 | 0  | 14 | 13 | 1  | 13 | 5545.7092 | -0.0034 |
| 14 | 1  | 14 | 13 | 1  | 13 | 5547.3662 | 0.0007  |
| 14 | 1  | 14 | 13 | 0  | 13 | 5550.3189 | -0.0008 |
| 14 | 1  | 13 | 13 | 1  | 12 | 5865.6106 | 0.0003  |
| 14 | 1  | 13 | 13 | 2  | 12 | 5785.6360 | -0.0003 |
| 14 | 2  | 13 | 14 | 1  | 14 | 3774.4335 | 0.0001  |
| 14 | 2  | 13 | 13 | 1  | 12 | 5915.6156 | 0.0001  |
| 14 | 2  | 13 | 13 | 2  | 12 | 5835.6409 | -0.0006 |
| 14 | 2  | 12 | 13 | 3  | 11 | 5572.3003 | -0.0008 |
| 14 | 2  | 12 | 13 | 2  | 11 | 6234.5518 | 0.0044  |
| 14 | 3  | 12 | 13 | 3  | 11 | 6067.1143 | 0.0008  |
| 14 | 3  | 12 | 14 | 2  | 13 | 3318.5763 | 0.0000  |
| 14 | 3  | 11 | 13 | 3  | 10 | 6423.8059 | 0.0025  |
| 14 | 4  | 11 | 13 | 4  | 10 | 6175.7654 | 0.0009  |
| 14 | 4  | 10 | 13 | 4  | 9  | 6321.1977 | -0.0017 |
| 14 | 4  | 10 | 14 | 3  | 11 | 2147.6198 | 0.0000  |
| 14 | 5  | 10 | 13 | 5  | 9  | 6182.8068 | 0.0002  |
| 14 | 5  | 9  | 13 | 5  | 8  | 6202.7769 | -0.0009 |
| 14 | 6  | 9  | 13 | 6  | 8  | 6162.8497 | 0.0000  |
| 14 | 6  | 8  | 13 | 6  | 7  | 6164.1723 | -0.0001 |
| 14 | 7  | 8  | 13 | 7  | 7  | 6147.1616 | 0.0001  |
| 14 | 7  | 7  | 13 | 7  | 6  | 6147.2144 | 0.0001  |
| 14 | 8  | 7  | 13 | 8  | 6  | 6136.9362 | 0.0001  |
| 14 | 8  | 6  | 13 | 8  | 5  | 6136.9376 | 0.0001  |
| 14 | 9  | 6  | 13 | 9  | 5  | 6130.0228 | 0.0002  |
| 14 | 9  | 5  | 13 | 9  | 4  | 6130.0228 | 0.0002  |
| 14 | 10 | 5  | 13 | 10 | 4  | 6125.1211 | 0.0003  |
| 14 | 10 | 4  | 13 | 10 | 3  | 6125.1211 | 0.0003  |
| 14 | 11 | 4  | 13 | 11 | 3  | 6121.5122 | 0.0004  |
| 14 | 11 | 3  | 13 | 11 | 2  | 6121.5122 | 0.0004  |
| 14 | 12 | 3  | 13 | 12 | 2  | 6118.7739 | 0.0004  |
| 14 | 12 | 2  | 13 | 12 | 1  | 6118.7739 | 0.0004  |
| 15 | 0  | 15 | 14 | 1  | 14 | 5932.2613 | -0.0012 |
| 15 | 0  | 15 | 14 | 0  | 14 | 5933.9149 | -0.0005 |
| 15 | 1  | 15 | 14 | 0  | 14 | 5934.8313 | -0.0012 |
| 15 | 1  | 15 | 14 | 1  | 14 | 5933.1790 | -0.0005 |
| 15 | 1  | 14 | 14 | 1  | 13 | 6244.7677 | -0.0005 |
| 15 | 1  | 14 | 14 | 2  | 13 | 6194.7631 | 0.0001  |
| 15 | 1  | 14 | 15 | 0  | 15 | 4036.9338 | 0.0000  |
| 15 | 2  | 14 | 14 | 2  | 13 | 6225.3899 | -0.0011 |
| 15 | 2  | 14 | 14 | 1  | 13 | 6275.3961 | 0.0000  |
| 15 | 2  | 14 | 15 | 1  | 15 | 4066.6448 | 0.0000  |
| 15 | 2  | 13 | 15 | 1  | 14 | 3244.1065 | 0.0000  |
| 15 | 2  | 13 | 14 | 3  | 12 | 6120.2938 | 0.0005  |
| 15 | 2  | 13 | 14 | 2  | 12 | 6615.1103 | 0.0047  |
| 15 | 3  | 13 | 14 | 3  | 12 | 6475.4025 | 0.0008  |
| 15 | 3  | 13 | 15 | 2  | 14 | 3568.5872 | 0.0003  |
| 15 | 3  | 12 | 15 | 2  | 13 | 2201.4753 | 0.0000  |
| 15 | 3  | 12 | 14 | 4  | 11 | 5092.9432 | -0.0002 |
| 15 | 3  | 12 | 14 | 3  | 11 | 6872.3650 | 0.0042  |
| 15 | 4  | 12 | 15 | 3  | 13 | 3365.1399 | 0.0000  |
| 15 | 4  | 12 | 14 | 4  | 11 | 6611.7179 | 0.0014  |
| 15 | 4  | 11 | 14 | 4  | 10 | 6814.7681 | -0.0010 |

|    |    |    |    |    |    |           |         |
|----|----|----|----|----|----|-----------|---------|
| 15 | 5  | 11 | 14 | 5  | 10 | 6632.7383 | 0.0006  |
| 15 | 5  | 10 | 14 | 5  | 9  | 6668.6117 | -0.0012 |
| 15 | 6  | 10 | 14 | 6  | 9  | 6612.0145 | 0.0002  |
| 15 | 6  | 9  | 14 | 6  | 8  | 6614.8799 | -0.0001 |
| 15 | 7  | 9  | 14 | 7  | 8  | 6593.0013 | 0.0002  |
| 15 | 7  | 8  | 14 | 7  | 7  | 6593.1378 | 0.0002  |
| 15 | 8  | 8  | 14 | 8  | 7  | 6580.3724 | 0.0003  |
| 15 | 8  | 7  | 14 | 8  | 6  | 6580.3766 | 0.0003  |
| 15 | 9  | 7  | 14 | 9  | 6  | 6571.8409 | 0.0004  |
| 15 | 9  | 6  | 14 | 9  | 5  | 6571.8410 | 0.0004  |
| 15 | 10 | 6  | 14 | 10 | 5  | 6565.8017 | 0.0004  |
| 15 | 10 | 5  | 14 | 10 | 4  | 6565.8017 | 0.0004  |
| 15 | 12 | 4  | 14 | 12 | 3  | 6557.9921 | 0.0006  |
| 15 | 12 | 3  | 14 | 12 | 2  | 6557.9921 | 0.0006  |
| 16 | 0  | 16 | 15 | 0  | 15 | 6319.2924 | -0.0009 |
| 16 | 0  | 16 | 15 | 1  | 15 | 6318.3749 | -0.0014 |
| 16 | 1  | 16 | 15 | 1  | 15 | 6318.8805 | -0.0009 |
| 16 | 1  | 16 | 15 | 0  | 15 | 6319.7970 | -0.0014 |
| 16 | 1  | 15 | 15 | 2  | 14 | 6595.1581 | 0.0008  |
| 16 | 1  | 15 | 15 | 1  | 14 | 6625.7838 | -0.0014 |
| 16 | 2  | 15 | 15 | 1  | 14 | 6644.2290 | 0.0000  |
| 16 | 2  | 15 | 15 | 2  | 14 | 6613.5993 | -0.0017 |
| 16 | 2  | 15 | 16 | 1  | 16 | 4361.3645 | 0.0001  |
| 16 | 2  | 14 | 15 | 2  | 13 | 6988.1670 | 0.0045  |
| 16 | 3  | 14 | 15 | 3  | 13 | 6878.6593 | 0.0007  |
| 16 | 3  | 13 | 15 | 4  | 12 | 5786.1890 | -0.0008 |
| 16 | 4  | 13 | 16 | 3  | 14 | 3529.2816 | 0.0003  |
| 16 | 4  | 13 | 15 | 4  | 12 | 7042.8019 | 0.0020  |
| 16 | 8  | 9  | 15 | 8  | 8  | 7024.8890 | 0.0005  |
| 16 | 8  | 8  | 15 | 8  | 7  | 7024.9011 | 0.0004  |
| 16 | 9  | 8  | 15 | 9  | 7  | 7014.4915 | 0.0005  |
| 16 | 9  | 7  | 15 | 9  | 6  | 7014.4918 | 0.0005  |
| 16 | 10 | 7  | 15 | 10 | 6  | 7007.1447 | 0.0006  |
| 16 | 10 | 6  | 15 | 10 | 5  | 7007.1447 | 0.0006  |
| 16 | 12 | 5  | 15 | 12 | 4  | 6997.6592 | 0.0007  |
| 16 | 12 | 4  | 15 | 12 | 3  | 6997.6592 | 0.0007  |
| 17 | 0  | 17 | 16 | 0  | 16 | 6704.7427 | -0.0014 |
| 17 | 0  | 17 | 16 | 1  | 16 | 6704.2374 | -0.0016 |
| 17 | 1  | 17 | 16 | 1  | 16 | 6704.5140 | -0.0014 |
| 17 | 1  | 17 | 16 | 0  | 16 | 6705.0189 | -0.0016 |
| 17 | 1  | 16 | 16 | 1  | 15 | 7008.2389 | -0.0023 |
| 17 | 2  | 16 | 17 | 1  | 17 | 4657.6000 | 0.0034  |
| 17 | 2  | 16 | 16 | 2  | 15 | 7000.7450 | -0.0026 |
| 17 | 3  | 15 | 17 | 2  | 16 | 4110.3502 | -0.0061 |
| 17 | 5  | 13 | 17 | 4  | 14 | 3814.0407 | 0.0004  |
| 17 | 6  | 12 | 17 | 5  | 13 | 4433.5583 | 0.0002  |
| 18 | 1  | 17 | 18 | 0  | 18 | 4948.4061 | 0.0000  |
| 18 | 2  | 17 | 18 | 1  | 18 | 4954.6760 | -0.0028 |
| 18 | 2  | 16 | 18 | 1  | 17 | 4294.8297 | 0.0007  |
| 18 | 7  | 12 | 18 | 6  | 13 | 5257.1198 | -0.0020 |
| 18 | 7  | 11 | 18 | 6  | 12 | 5217.3776 | -0.0039 |
| 19 | 3  | 17 | 19 | 2  | 18 | 4687.0380 | 0.0006  |
| 19 | 7  | 13 | 19 | 6  | 14 | 5227.0799 | -0.0007 |
| 20 | 2  | 18 | 20 | 1  | 19 | 4941.7511 | -0.0043 |

**Table S10.** Experimental transition frequencies of the observed parent species of conformer **XIII** of the TFB dimer.

| $J'$ | $Ka'$ | $Kc'$ | $J''$ | $Ka''$ | $Kc''$ | $\nu_{\text{obs}}/\text{MHz}$ | $\Delta\nu_{\text{obs-calc}}/\text{MHz}$ |
|------|-------|-------|-------|--------|--------|-------------------------------|------------------------------------------|
| 3    | 3     | 1     | 2     | 2      | 0      | 2849.6907                     | -0.0001                                  |
| 3    | 3     | 0     | 2     | 2      | 1      | 2869.0800                     | -0.0050                                  |
| 4    | 2     | 3     | 3     | 1      | 3      | 3113.8985                     | 0.0000                                   |
| 4    | 2     | 3     | 3     | 1      | 2      | 2660.7693                     | -0.0002                                  |
| 4    | 2     | 2     | 3     | 1      | 3      | 3328.3091                     | 0.0004                                   |
| 4    | 3     | 2     | 3     | 2      | 2      | 3428.8512                     | 0.0000                                   |
| 4    | 3     | 2     | 3     | 2      | 1      | 3349.0025                     | 0.0024                                   |
| 4    | 3     | 1     | 3     | 2      | 2      | 3445.3929                     | -0.0160                                  |
| 4    | 3     | 1     | 3     | 2      | 1      | 3365.5577                     | 0.0000                                   |
| 4    | 4     | 1     | 3     | 3      | 1      | 3896.6357                     | -0.0034                                  |
| 4    | 4     | 1     | 3     | 3      | 0      | 3894.2011                     | 0.0006                                   |
| 4    | 4     | 0     | 3     | 3      | 1      | 3896.9245                     | -0.0040                                  |
| 4    | 4     | 0     | 3     | 3      | 0      | 3894.4900                     | 0.0000                                   |
| 5    | 0     | 5     | 4     | 1      | 4      | 2405.9130                     | -0.0005                                  |
| 5    | 1     | 5     | 4     | 0      | 4      | 2476.7594                     | -0.0004                                  |
| 5    | 1     | 4     | 4     | 0      | 4      | 3553.3753                     | 0.0000                                   |
| 5    | 2     | 4     | 4     | 1      | 3      | 3047.7053                     | -0.0078                                  |
| 5    | 2     | 4     | 4     | 1      | 4      | 3790.4189                     | 0.0000                                   |
| 5    | 2     | 3     | 4     | 1      | 3      | 3477.3893                     | 0.0000                                   |
| 5    | 3     | 3     | 4     | 2      | 3      | 4013.9692                     | 0.0032                                   |
| 5    | 3     | 3     | 4     | 2      | 2      | 3799.5523                     | -0.0035                                  |
| 5    | 3     | 2     | 4     | 2      | 3      | 4076.1850                     | 0.0002                                   |
| 5    | 3     | 2     | 4     | 2      | 2      | 3861.7747                     | 0.0000                                   |
| 5    | 4     | 2     | 4     | 3      | 2      | 4440.6937                     | 0.0074                                   |
| 5    | 4     | 2     | 4     | 3      | 1      | 4424.1290                     | 0.0003                                   |
| 5    | 4     | 1     | 4     | 3      | 1      | 4426.6830                     | 0.0006                                   |
| 5    | 4     | 1     | 4     | 3      | 2      | 4443.2430                     | 0.0029                                   |
| 5    | 5     | 1     | 4     | 4      | 0      | 4931.4240                     | -0.0057                                  |
| 5    | 5     | 1     | 4     | 4      | 1      | 4931.7192                     | 0.0000                                   |
| 5    | 5     | 0     | 4     | 4      | 1      | 4931.7550                     | 0.0048                                   |
| 5    | 5     | 0     | 4     | 4      | 0      | 4931.4608                     | 0.0000                                   |
| 6    | 0     | 6     | 5     | 1      | 5      | 2883.7034                     | -0.0004                                  |
| 6    | 1     | 6     | 5     | 0      | 5      | 2915.8579                     | -0.0043                                  |
| 6    | 1     | 5     | 5     | 0      | 5      | 4342.7742                     | -0.0001                                  |
| 6    | 1     | 5     | 5     | 2      | 4      | 2958.2758                     | 0.0070                                   |
| 6    | 2     | 5     | 5     | 1      | 4      | 3417.8389                     | 0.0051                                   |
| 6    | 2     | 5     | 5     | 1      | 5      | 4494.4550                     | 0.0058                                   |
| 6    | 2     | 4     | 5     | 1      | 4      | 4137.7103                     | -0.0001                                  |
| 6    | 3     | 4     | 5     | 2      | 4      | 4627.5672                     | -0.0003                                  |
| 6    | 3     | 4     | 5     | 2      | 3      | 4197.8911                     | -0.0002                                  |
| 6    | 3     | 3     | 5     | 2      | 4      | 4794.6887                     | 0.0078                                   |
| 6    | 3     | 3     | 5     | 2      | 3      | 4365.0048                     | 0.0000                                   |
| 6    | 4     | 3     | 5     | 3      | 3      | 4992.3106                     | -0.0001                                  |
| 6    | 4     | 3     | 5     | 3      | 2      | 4930.0887                     | -0.0031                                  |
| 6    | 4     | 2     | 5     | 3      | 3      | 5004.6394                     | 0.0050                                   |
| 6    | 4     | 2     | 5     | 3      | 2      | 4942.4220                     | 0.0064                                   |
| 6    | 5     | 2     | 5     | 4      | 2      | 5471.8209                     | -0.0039                                  |

|   |   |   |   |   |   |           |         |
|---|---|---|---|---|---|-----------|---------|
| 6 | 5 | 2 | 5 | 4 | 1 | 5469.2708 | -0.0003 |
| 6 | 5 | 1 | 5 | 4 | 1 | 5469.6049 | -0.0020 |
| 6 | 5 | 1 | 5 | 4 | 2 | 5472.1613 | 0.0006  |
| 6 | 6 | 1 | 5 | 5 | 0 | 5967.4964 | -0.0083 |
| 6 | 6 | 1 | 5 | 5 | 1 | 5967.5358 | 0.0001  |
| 6 | 6 | 0 | 5 | 5 | 0 | 5967.5079 | 0.0001  |
| 6 | 6 | 0 | 5 | 5 | 1 | 5967.5329 | -0.0060 |
| 7 | 0 | 7 | 6 | 1 | 6 | 3351.0422 | 0.0047  |
| 7 | 1 | 7 | 6 | 0 | 6 | 3364.7201 | 0.0052  |
| 7 | 1 | 6 | 6 | 2 | 5 | 3524.0827 | -0.0008 |
| 7 | 1 | 6 | 6 | 0 | 6 | 5134.8283 | -0.0007 |
| 7 | 2 | 6 | 6 | 1 | 5 | 3792.7172 | 0.0032  |
| 7 | 2 | 6 | 6 | 1 | 6 | 5219.6255 | -0.0006 |
| 7 | 2 | 5 | 6 | 1 | 5 | 4862.0055 | -0.0003 |
| 7 | 2 | 5 | 6 | 3 | 3 | 3025.5938 | 0.0000  |
| 7 | 3 | 5 | 6 | 2 | 4 | 4552.5700 | -0.0064 |
| 7 | 3 | 5 | 6 | 2 | 5 | 5272.4528 | -0.0002 |
| 7 | 3 | 4 | 6 | 2 | 4 | 4906.2290 | -0.0049 |
| 7 | 3 | 4 | 6 | 2 | 5 | 5626.1108 | 0.0003  |
| 7 | 4 | 4 | 6 | 3 | 3 | 5391.0948 | 0.0000  |
| 7 | 4 | 4 | 6 | 3 | 4 | 5558.2085 | 0.0002  |
| 7 | 4 | 3 | 6 | 3 | 4 | 5600.7753 | -0.0048 |
| 7 | 4 | 3 | 6 | 3 | 3 | 5433.6671 | 0.0004  |
| 7 | 5 | 3 | 6 | 4 | 3 | 6012.4903 | 0.0002  |
| 7 | 5 | 3 | 6 | 4 | 2 | 6000.1658 | -0.0005 |
| 7 | 5 | 2 | 6 | 4 | 2 | 6002.1319 | 0.0002  |
| 7 | 5 | 2 | 6 | 4 | 3 | 6014.4526 | -0.0029 |
| 7 | 6 | 2 | 6 | 5 | 2 | 6507.2081 | 0.0000  |
| 7 | 6 | 2 | 6 | 5 | 1 | 6506.8684 | -0.0038 |
| 7 | 6 | 1 | 6 | 5 | 1 | 6506.9122 | 0.0000  |
| 7 | 6 | 1 | 6 | 5 | 2 | 6507.2531 | 0.0050  |
| 8 | 0 | 8 | 7 | 1 | 7 | 3813.2532 | 0.0016  |
| 8 | 1 | 8 | 7 | 0 | 7 | 3818.8181 | 0.0017  |
| 8 | 1 | 7 | 7 | 0 | 7 | 5916.4042 | 0.0028  |
| 8 | 1 | 7 | 7 | 2 | 6 | 4047.8121 | -0.0006 |
| 8 | 2 | 7 | 7 | 1 | 6 | 4189.0148 | 0.0000  |
| 8 | 2 | 6 | 7 | 1 | 6 | 5642.0842 | -0.0025 |
| 8 | 2 | 6 | 7 | 3 | 5 | 3893.7205 | 0.0033  |
| 8 | 3 | 6 | 7 | 2 | 6 | 5948.2423 | 0.0001  |
| 8 | 3 | 6 | 7 | 2 | 5 | 4878.9553 | 0.0049  |
| 8 | 3 | 5 | 7 | 2 | 5 | 5506.1433 | 0.0014  |
| 8 | 4 | 5 | 7 | 3 | 4 | 5792.0344 | -0.0009 |
| 8 | 4 | 5 | 7 | 3 | 5 | 6145.6882 | -0.0046 |
| 8 | 4 | 4 | 7 | 3 | 5 | 6261.7063 | 0.0010  |
| 8 | 4 | 4 | 7 | 3 | 4 | 5908.0477 | -0.0001 |
| 8 | 5 | 4 | 7 | 4 | 4 | 6556.1622 | 0.0001  |
| 8 | 5 | 4 | 7 | 4 | 3 | 6513.5908 | 0.0006  |
| 8 | 5 | 3 | 7 | 4 | 4 | 6564.3582 | 0.0008  |
| 8 | 5 | 3 | 7 | 4 | 3 | 6521.7857 | 0.0001  |

|    |    |    |    |   |    |           |         |
|----|----|----|----|---|----|-----------|---------|
| 9  | 0  | 9  | 8  | 1 | 8  | 4273.1645 | 0.0008  |
| 9  | 1  | 9  | 8  | 0 | 8  | 4275.3623 | 0.0056  |
| 9  | 1  | 8  | 8  | 2 | 7  | 4541.2756 | -0.0062 |
| 9  | 2  | 8  | 8  | 1 | 7  | 4609.5784 | -0.0015 |
| 9  | 2  | 7  | 8  | 3 | 6  | 4550.7279 | 0.0023  |
| 9  | 3  | 7  | 8  | 2 | 6  | 5198.3859 | -0.0002 |
| 9  | 4  | 6  | 8  | 3 | 5  | 6133.5870 | 0.0035  |
| 9  | 4  | 5  | 8  | 3 | 5  | 6394.2032 | 0.0007  |
| 10 | 0  | 10 | 9  | 1 | 9  | 4732.1008 | 0.0031  |
| 10 | 0  | 10 | 9  | 0 | 9  | 4732.7118 | 0.0023  |
| 10 | 1  | 10 | 9  | 0 | 9  | 4732.9430 | 0.0015  |
| 10 | 1  | 10 | 9  | 1 | 9  | 4732.3259 | -0.0038 |
| 10 | 1  | 9  | 9  | 2 | 8  | 5016.7790 | 0.0000  |
| 10 | 2  | 9  | 9  | 1 | 8  | 5047.8668 | -0.0035 |
| 10 | 3  | 8  | 9  | 2 | 7  | 5534.7833 | -0.0012 |
| 10 | 4  | 7  | 9  | 3 | 6  | 6429.6350 | 0.0036  |
| 10 | 7  | 4  | 10 | 6 | 5  | 3165.1000 | 0.0139  |
| 10 | 9  | 2  | 10 | 8 | 3  | 4196.6309 | 0.0108  |
| 10 | 9  | 1  | 10 | 8 | 2  | 4196.6268 | 0.0108  |
| 11 | 0  | 11 | 10 | 0 | 10 | 5190.8611 | 0.0000  |
| 11 | 0  | 11 | 10 | 1 | 10 | 5190.6291 | 0.0001  |
| 11 | 1  | 11 | 10 | 0 | 10 | 5190.9477 | 0.0000  |
| 11 | 1  | 11 | 10 | 1 | 10 | 5190.7157 | 0.0000  |
| 11 | 1  | 10 | 10 | 2 | 9  | 5482.8358 | -0.0062 |
| 11 | 2  | 10 | 10 | 1 | 9  | 5496.3816 | -0.0002 |
| 11 | 2  | 9  | 10 | 3 | 8  | 5695.6610 | 0.0016  |
| 11 | 3  | 9  | 10 | 2 | 8  | 5904.0444 | -0.0001 |
| 12 | 0  | 12 | 11 | 1 | 11 | 5648.9935 | 0.0002  |
| 12 | 0  | 12 | 11 | 0 | 11 | 5649.0799 | 0.0000  |
| 12 | 1  | 12 | 11 | 0 | 11 | 5649.1120 | 0.0002  |
| 12 | 1  | 12 | 11 | 1 | 11 | 5649.0252 | 0.0000  |
| 12 | 1  | 11 | 11 | 2 | 10 | 5944.3615 | 0.0002  |
| 12 | 1  | 11 | 12 | 0 | 12 | 3318.8719 | -0.0010 |
| 12 | 2  | 11 | 12 | 1 | 12 | 3320.5080 | 0.0012  |
| 12 | 2  | 11 | 11 | 1 | 10 | 5950.0628 | 0.0001  |
| 12 | 2  | 10 | 11 | 3 | 9  | 6202.1590 | 0.0018  |
| 12 | 3  | 10 | 11 | 2 | 9  | 6306.9496 | 0.0001  |
| 12 | 10 | 3  | 12 | 9 | 4  | 4681.1124 | -0.0080 |
| 12 | 10 | 2  | 12 | 9 | 3  | 4681.1084 | -0.0089 |
| 13 | 0  | 13 | 12 | 0 | 12 | 6107.3135 | 0.0000  |
| 13 | 0  | 13 | 12 | 1 | 12 | 6107.2821 | 0.0005  |
| 13 | 1  | 13 | 12 | 0 | 12 | 6107.3256 | 0.0005  |
| 13 | 1  | 13 | 12 | 1 | 12 | 6107.2932 | 0.0000  |
| 13 | 1  | 12 | 12 | 2 | 11 | 6403.8280 | -0.0038 |
| 13 | 2  | 12 | 12 | 1 | 11 | 6406.1698 | -0.0002 |
| 14 | 0  | 14 | 13 | 0 | 13 | 6565.5385 | 0.0000  |
| 14 | 0  | 14 | 13 | 1 | 13 | 6565.5267 | -0.0002 |
| 14 | 1  | 14 | 13 | 1 | 13 | 6565.5311 | 0.0000  |
| 14 | 1  | 14 | 13 | 0 | 13 | 6565.5425 | -0.0002 |

**Table S11.** Rotational constants of the observed conformers of the TFB dimer calculated at the different levels of theory with deviations from the experimental values.<sup>a</sup>

| Conformers  | Methods                    | <i>A</i> /MHz    | <i>B</i> /MHz    | <i>C</i> /MHz    | Ave <sup>b</sup> (%) |
|-------------|----------------------------|------------------|------------------|------------------|----------------------|
|             | <b>Exp.</b>                | <b>564.70358</b> | <b>293.04485</b> | <b>266.28527</b> |                      |
| <b>I</b>    | MP2/6-311++G(2d,p)         | 560.3(0.8%)      | 312.5(-6.6%)     | 280.2(-5.2%)     | <b>4.2%</b>          |
|             | B3LYP-D3BJ/6-311++G(2d,p)  | 561.3(0.6%)      | 304.5(-3.9%)     | 274.8(-3.2%)     | <b>2.6%</b>          |
|             | B3LYP-D3BJ/def2-TZVP       | 564.6(0.0%)      | 299.5(-2.2%)     | 271.5(-2.0%)     | <b>1.4%</b>          |
|             | B2PLYP-D3BJ/6-311++G(2d,p) | 560.7(0.7%)      | 307.3(-4.9%)     | 276.5(-3.8%)     | <b>3.1%</b>          |
|             | B2PLYP-D3BJ/def2-TZVP      | 566.4(-0.3%)     | 298.2(-1.7%)     | 270.3(-1.5%)     | <b>1.2%</b>          |
|             | <b>Exp.</b>                | <b>543.64824</b> | <b>271.46605</b> | <b>227.56674</b> |                      |
| <b>II</b>   | MP2/6-311++G(2d,p)         | 543.2(0.1%)      | 286.7(-5.6%)     | 239.3(-5.2%)     | <b>3.6%</b>          |
|             | B3LYP-D3BJ/6-311++G(2d,p)  | 538.4(1.0%)      | 284.5(-4.8%)     | 236.7(-4.0%)     | <b>3.3%</b>          |
|             | B3LYP-D3BJ/def2-TZVP       | 539.4(0.8%)      | 280.7(-3.4%)     | 234.1(-2.9%)     | <b>2.4%</b>          |
|             | B2PLYP-D3BJ/6-311++G(2d,p) | 541.6(0.4%)      | 283.3(-4.4%)     | 236.5(-3.9%)     | <b>2.9%</b>          |
|             | B2PLYP-D3BJ/def2-TZVP      | 542.9(0.1%)      | 278.2(-2.5%)     | 232.6(-2.2%)     | <b>1.6%</b>          |
|             | <b>Exp.</b>                | <b>515.73096</b> | <b>313.29220</b> | <b>250.91942</b> |                      |
| <b>IV</b>   | MP2/6-311++G(2d,p)         | 508.4(1.4%)      | 339.0(-8.2%)     | 262.8(-4.7%)     | <b>4.8%</b>          |
|             | B3LYP-D3BJ/6-311++G(2d,p)  | 509.1(1.3%)      | 326.3(-4.1%)     | 259.5(-3.4%)     | <b>3.0%</b>          |
|             | B3LYP-D3BJ/def2-TZVP       | 512.4(0.7%)      | 320.0(-2.1%)     | 257.1(-2.5%)     | <b>1.8%</b>          |
|             | B2PLYP-D3BJ/6-311++G(2d,p) | 509.3(1.3%)      | 330.1(-5.3%)     | 260.5(-3.8%)     | <b>3.5%</b>          |
|             | B2PLYP-D3BJ/def2-TZVP      | 516.0(-0.1%)     | 317.7(-1.4%)     | 255.8(-1.9%)     | <b>1.1%</b>          |
|             | <b>Exp.</b>                | <b>634.88225</b> | <b>242.50349</b> | <b>192.84574</b> |                      |
| <b>V</b>    | MP2/6-311++G(2d,p)         | 644.4(-1.5%)     | 251.9(-3.9%)     | 199.8(-3.6%)     | <b>3.0%</b>          |
|             | B3LYP-D3BJ/6-311++G(2d,p)  | 637.5(-0.4%)     | 250.1(-3.1%)     | 197.7(-2.5%)     | <b>2.0%</b>          |
|             | B3LYP-D3BJ/def2-TZVP       | 635.8(-0.1%)     | 247.3(-2.0%)     | 195.8(-1.5%)     | <b>1.2%</b>          |
|             | B2PLYP-D3BJ/6-311++G(2d,p) | 642.2(-1.1%)     | 249.2(-2.7%)     | 197.6(-2.5%)     | <b>2.1%</b>          |
|             | B2PLYP-D3BJ/def2-TZVP      | 638.8(-0.6%)     | 245.3(-1.2%)     | 194.8(-1.0%)     | <b>0.9%</b>          |
|             | <b>Exp.</b>                | <b>517.9661</b>  | <b>305.1570</b>  | <b>229.22660</b> |                      |
| <b>XIII</b> | MP2/6-311++G(2d,p)         | 512.7(1.0%)      | 333.9(-9.4%)     | 246.5(-7.5%)     | <b>5.3%</b>          |
|             | B3LYP-D3BJ/6-311++G(2d,p)  | 512.2(1.1%)      | 323.1(-5.9%)     | 239.5(-4.5%)     | <b>3.8%</b>          |
|             | B3LYP-D3BJ/def2-TZVP       | 515.2(0.5%)      | 311.6(-2.1%)     | 233.2(-1.7%)     | <b>1.5%</b>          |
|             | B2PLYP-D3BJ/6-311++G(2d,p) | 513.7(0.8%)      | 324.5(-6.3%)     | 240.5(-4.9%)     | <b>4.0%</b>          |
|             | B2PLYP-D3BJ/def2-TZVP      | 518.8(-0.2%)     | 306.9(-0.6%)     | 231.0(-0.8%)     | <b>0.5%</b>          |

<sup>a</sup> The values in parentheses are percentage differences defined as:  $100\% \times (\text{experimental} - \text{theoretical})/\text{experimental}$ .

<sup>b</sup> Average absolute percentage error for each level.

**Table S12.** The decomposition of total interaction energies in  $\text{kJ mol}^{-1}$  at the SAPT2+(3)/aug-cc-pVDZ level for the six aliphatic alcohol homodimers as well as water homodimer.

|                                    | Electrostatics          | Induction  | Dispersion | Exchange | Total |
|------------------------------------|-------------------------|------------|------------|----------|-------|
| TFB-I                              | -58.6(50%) <sup>a</sup> | -19.5(17%) | -38.3(33%) | 78.4     | -38.0 |
| TFB-II                             | -49.8(50%)              | -17.9(18%) | -32.0(32%) | 66.2     | -33.5 |
| TFB-IV                             | -49.1(49%)              | -17.0(17%) | -34.2(34%) | 68.1     | -32.1 |
| TFB-V                              | -46.8(51%)              | -15.4(17%) | -30.3(33%) | 62.9     | -29.5 |
| TFB-XIII                           | -48.8(49%)              | -17.2(17%) | -33.4(34%) | 65.4     | -34.0 |
| Methanol dimer <sup>b</sup>        | -40.1(59%)              | -14.0(20%) | -14.4(21%) | 46.8     | -21.6 |
| Ethanol dimer <sup>b</sup>         | -44.3(55%)              | -15.3(19%) | -20.9(26%) | 54.7     | -25.9 |
| 2-Fluoroethanol dimer <sup>b</sup> | -65.6(56%)              | -20.6(18%) | -30.7(26%) | 84.9     | -32.0 |
| TFE dimer <sup>b</sup>             | -45.2(54%)              | -15.8(19%) | -23.3(28%) | 55.2     | -29.0 |
| TFP dimer <sup>b</sup>             | -56.2(54%)              | -20.3(19%) | -27.8(27%) | 67.6     | -36.7 |
| Water dimer                        | -35.7(63%)              | -11.1(20%) | -9.4(17%)  | 37.5     | -18.6 |

<sup>a</sup> Number in parenthesis refer to the percentage contribution of electrostatic, induction, and dispersion terms to the total attractive interactions.

<sup>b</sup> Only the most stable conformers are considered for these five alcohol homodimers.

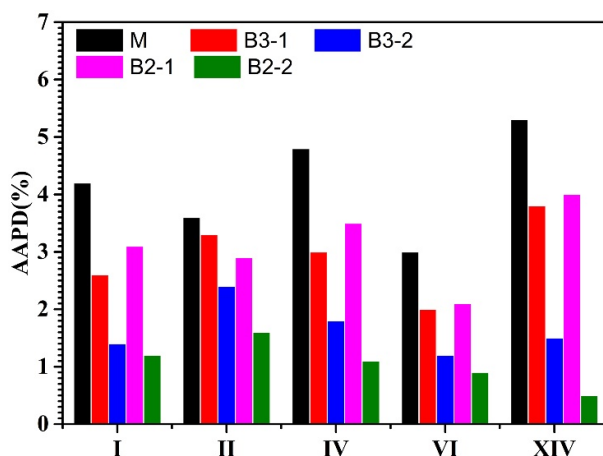

**Figure S1.** Average absolute percentage deviations (AAPD) between experimental rotational constants ( $A_0$ ,  $B_0$ , and  $C_0$ ) and theoretical values ( $A_e$ ,  $B_e$ , and  $C_e$ ) calculated at the MP2/6-311++G(2d,p) (M), B3LYP-D3BJ/6-311++G(2d,p) (B3-1), B3LYP-D3BJ/def2-TZVP (B3-2), B2PLYP-D3BJ/6-311++G(2d,p) (B2-1), and B2PLYP-D3BJ/def2-TZVP (B2-2) levels for the five observed TFB dimeric conformers.



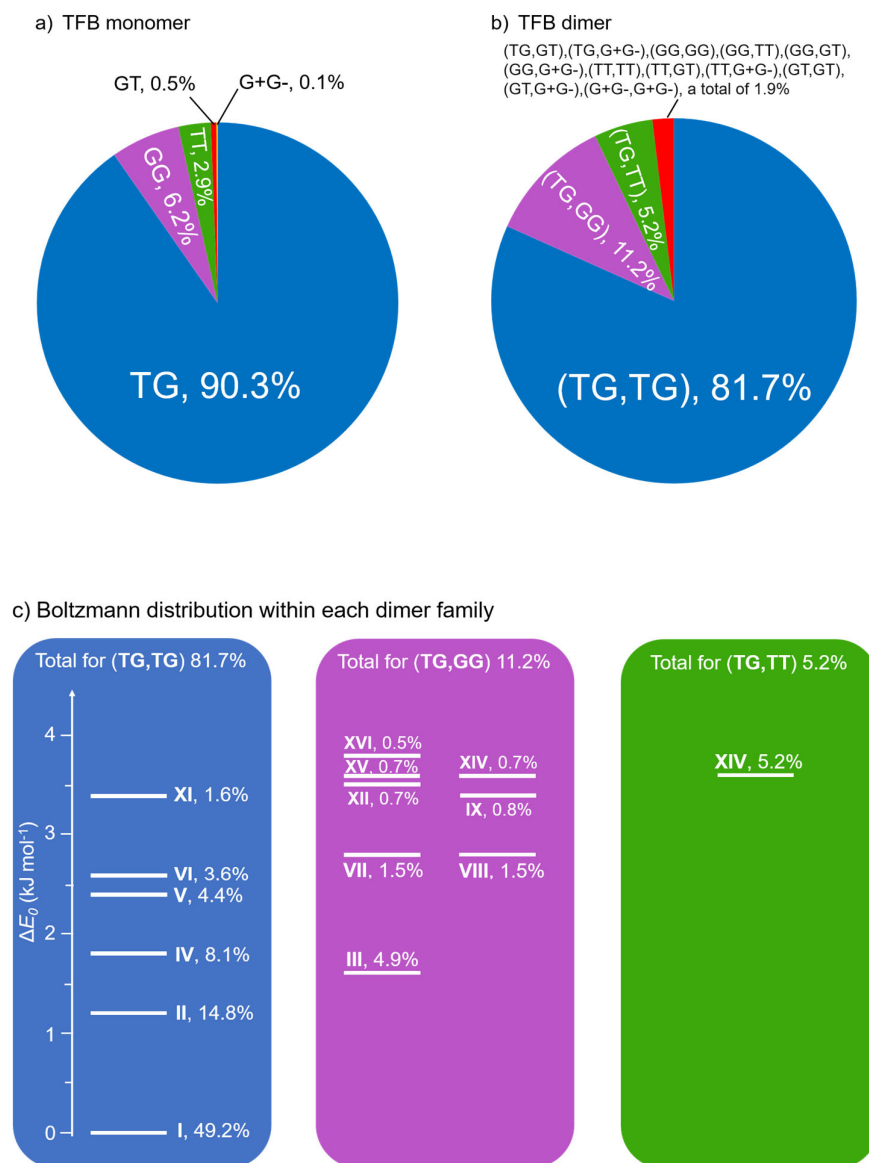

**Figure S2.** The modified kinetic-thermodynamic model for conformational abundances of the conformers of the TFB dimer in a jet. a) Boltzmann's percentage abundances of the five monomeric TFB families at a temperature of 120 K; b) The percentage abundances of the 15 TFB dimer families based on a kinetic controlled model and the available abundances of the five monomeric TFB families shown in a); c) The 16 most stable conformers in Table 1 are grouped into three TFB dimer family based on their constituents. The relative abundances of binary conformers within each TFB dimer family are calculated based on the Boltzmann distribution at a temperature of 120 K. The final percentage abundance values given take into account of both the Boltzmann distribution within a binary TFB family and the abundances of the specific family. Please see the discussions in the main text. For the predicted percentage abundances of **I:II:IV:V:XIII**, 60%:18%:10%:6%:6%, reported in the main text, we simply re-normalized the percentages of these five observed conformers.

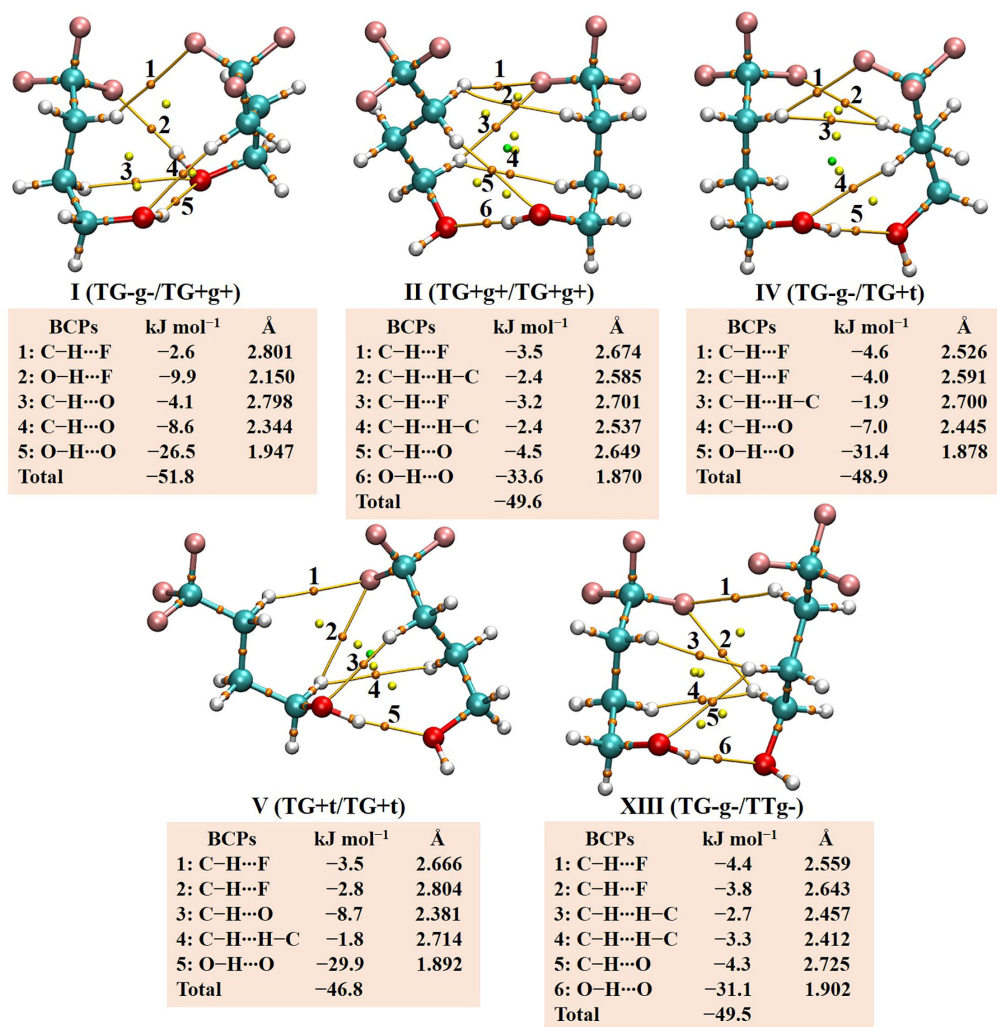

**Figure S3.** The QTAIM analysis results for the five observed conformers of TFB dimer. The orange and yellow dots indicate the bond critical points and ring critical points, and the green dots denote the cage critical points. The gold lines represent the bond paths. The energetic values of all the NCIs and the corresponding bond distance obtained at the B2PLYP-D3BJ/def2-TZVP level are also given.

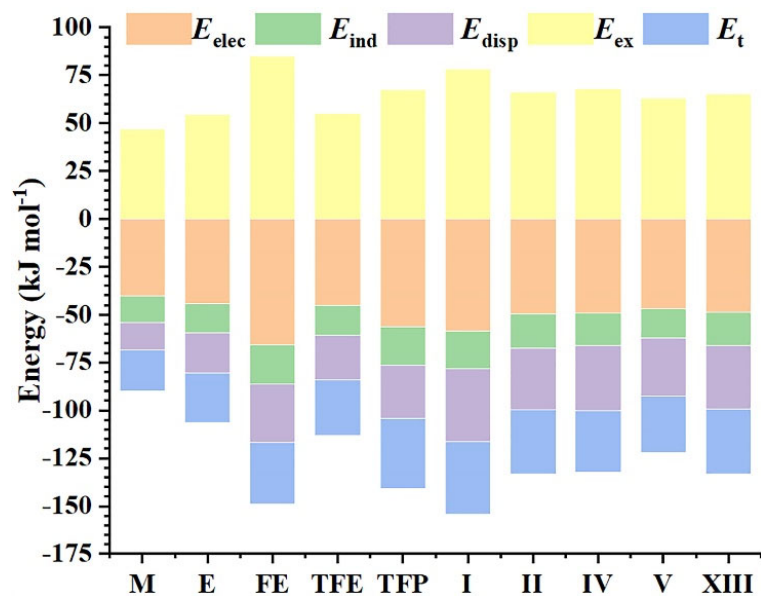

**Figure S4.** Comparison of the SAPT decompositions of total interaction energy for the most stable conformers of the methanol (M), ethanol (E), 2-fluoroethanol (FE), 2,2,2-trifluoroethanol (TFE), 3,3,3-trifluoro-1-propanol (TFP) dimers with the five observed conformers of TFP dimer, at their respective B3LYP-D3BJ/def2-TZVP geometries.
